# Supplementary material for: Rapid Evidence Review of Community Engagement in The UK During The COVID-19 Pandemic: How Can Community Assets Redress Health Inequities?
Source: Research Square preprint supplement (doi:10.21203/rs.3.rs-569641/v1), 2021-06-17
Supplement: Supplementary file 1 [file 7223dbe164390c97b5ae6f3d.docx]

**Appendix I:**

**Inclusion Criteria**

Types of studies: creative, arts and nature-related activities and resources created or changed in response to the protecting individual wellbeing and health during the COVID-19 Pandemic.

Time Period: March 2020 – January 2021

Language: English

Demographic Target: U.K. Adults

Research type: (In order of priority)

Peer-reviewed and academic journals, governmental reports, organisational reports, grey literature including online case studies examples.

Primary Databases:

Google Scholar, PubMed, Web of Science, Taylor and Francis, The Lancet, MedRXic, PsycharXiv,

**Exclusion Criteria:**

Studies on creative activities unrelated to COVID-19 Pandemic and/or Wellbeing

Studies not generalisable to UK Adults, or focused only on vulnerable groups with specific needs, as these require specific interventions that are not generalised to the wider population.
