# Supplementary material for: Rapid Evidence Review of Community Engagement in The UK During The COVID-19 Pandemic: How Can Community Assets Redress Health Inequities?
Source: Research Square preprint supplement (doi:10.21203/rs.3.rs-569641/v1), 2021-06-17
Supplement: Supplementary file 3 [file 9b6c131a6ecf086c8574e179.xlsx]

## Sheet: Sheet1
			Population					Intervention											Control	Outcome
Name of Author/ Organisation	Classification	Type of resource	RER Theme	RER Subtheme	Target Population 1 (main population)	Target Population 2 (secondary population)	n	Type	Method of delivery	Exposure	Frequency	Duration	Quality Assurance	Description	Commissioner(s) and funding sources	Cost to participant/ cost to organisation	Location (local)	Location (regional)	Control	Aims/ objectives	Evaluation Measurement 1	Evaluation Outcome 1	Evaluation Measurement 2	Evaluation Outcome 2	Outputs	Source	Link	Reference2	Weighting
Art & Soul	Grey Literature (case study within wider report)	Charity project	Psychological	Mental Health	People with mental health issues	N/A	42	Creative/Art	Online, posted	One hour	Once a week	3 months (03/2020-06/2020)	Yes - Therapist led	Remote Connectivity: An online art group, with weekly Zoom calls with art therapists, and art activity packs posted with resources and instructions.	Hampton Fund, Richmond Parish Lands Charity, Civic Pride Fund (London Borough of Richmond upon Thames).	Free for participants; Unknown	South west London	Greater London	0	"Improving mental health through creativity"	Evaluation questionnaire (unnamed)	60% of participants felt 'safe and secure' after doing the activities, 50% recorded that they 'enjoyed the company of other people' after taking part, and 50% reported that they felt very interested in trying new things after taking part.	Feedback	Feedback: ‘It was such a brilliant idea, it has saved my sanity in this terrible time.’ ‘It has been a wonderful, uplifting, eye-opening journey to embark on through quarantine. I’m starting to find my flow - it’s been so much fun hearing positive feedback and comments from different people. It’s been very inspiring seeing everybody’s scale of art and it has given me huge amounts of confidence in…	COMPLETED: Posted art materials; 14 weeks of art therapist; zoomcalls; creation of online community	https://www.artandsoul.org.uk/	CHWA - https://www.culturehealthandwellbeing.org.uk/how-creativity-and-culture-are-supporting-shielding-and-vulnerable-people-home-during-covid-19	R1	PHE > 10
Arts Derbyshire	Grey Literature (case study within wider report)	Charity project	Socioeconomic	Older	Older adults	People who are isolated/ housebound	100 target (29 currently after 3 weeks)	Creative/Art	Online, posted, phone	Unknown	ad hoc	18 months (01/2020-06/2021)	Unclear	Necklace of Stars: Together, artists and participants will make an embroidered quilt with a poem & song soundtrack inspired by lullabies. Lullabies bring calm & comfort, & also tell insightful stories that pass on the depth of human experience from generation to generation.	Hampton Fund, Richmond Parish Lands Charity, Civic Pride Fund (London Borough of Richmond upon Thames).	Free for participants; Unknown	Derbyshire	Midlands	0	"The project will build confidence & wellbeing, reduce loneliness, forge connections, re- ignite creativity. We will celebrate the work with community/participant events, alongside a 12-month exhibition tour, including Derbyshire Libraries & Museums & Sudbury Hall."	Working on Validated measurement with Institute of Mental Health	The organisation is working with the Institute of Mental Health to evaluate efficacy, but no findings yet	Feedback	Feedback: “I was feeling fragmented, fragile. I was working through that and trying to find strength and determination. So I grabbed onto the writing. I wasn’t aware of it at first, just playing with words and rhymes. And then it became clear to me, I’m speaking to myself and for myself... The writing has changed for me week to week, with my variable moods. Some days I thought: what’s the point? …	INTENDED: Embroidered quilt; 5 events; documentary film, exhibition	https://arthur-martha.com/portfolio/a-necklace-of-stars/	CHWA - https://www.culturehealthandwellbeing.org.uk/how-creativity-and-culture-are-supporting-shielding-and-vulnerable-people-home-during-covid-19	R2	PHE > 10
Arts Development Company	Grey Literature (case study within wider report)	CIC project	Socioeconomic	Community/ Isolated	People who are isolated or housebound	People with mental health issues	100 packs posted, 1456 video views	Creative/Art	Online, posted	Unknown	ad hoc	15 months (04/2020 - 07/2021)	No	Arts at Home: Mostly digital - workshops on art, music, dance and writing available, and some physical resources sent out to people.	Arts Council England, Derbyshire County Council Public Health, Arts Derbyshire	Free for participants; Unknown	SW England	SW England	0	"The project aimed to commission high quality interactive experiences designed by artists (multiple art forms) and able to be delivered digitally and by post."	Outputs measured	(See outputs)	Feedback	Feedback: “I’ve started to really look forward to them each week. P has even joined in from his wheelchair which I never thought he’d do...it’s become part of our routine.” “I loved this so much, it inspired a piece of my teaching this weekend on The Moving Connective Tissue Body” “L really responds to hearing your voice again when we play the films to her”	COMPLETED: 100 boxes delivered, digital content uploaded	https://theartsdevelopmentcompany.org.uk/arts-at-home-2/	CHWA - https://www.culturehealthandwellbeing.org.uk/how-creativity-and-culture-are-supporting-shielding-and-vulnerable-people-home-during-covid-19	R3	PHE > 10
Beaney House of Art & Knowledge	Grey Literature (case study within wider report)	Cultural Asset Case Study	Psychological	Shielding	People who are shielding	People experiencing mental health issues	100	Creative/Art	Online, over phone, posted	In your own time	ad hoc	7 months (03/2020-10/2020)	Yes - evidence based activities	Museum of You: An exhibition project inspired by lockdown and wellbeing, and a blog inspired by people's experiences with lockdown and social distancing. It invites people to create for either of these projects.	Arts Council England, Dorset Council	Free for participants; Unknown	Kent	SE England	0	"The aim of Museum of You was to produce a high-quality exhibition which captured the local experience of lockdown."	Validated	6 ways to wellbeing	Feedback	Feedback: “Many thanks for creating this opportunity for artists at this bleak time.” “These have all been great fun to produce and kept me sane” “I found the process of drawing and painting both cathartic and healing at the most difficult time of my life.” “It has given me a purpose each day and kept me positive and good-humored.”	COMPLETED: Exhibition running from 09-10/2020	https://canterburymuseums.co.uk/participate/health-and-wellbeing/museum-of-you/	CHWA - https://www.culturehealthandwellbeing.org.uk/how-creativity-and-culture-are-supporting-shielding-and-vulnerable-people-home-during-covid-19	R4	PHE > 10
Cambridge Curiosity & Imagination	Grey Literature (case study within wider report)	Charity project	Socioeconomic	Deprivation	Families	People with mental health issues	404	Creative/Art	Online, posted	Unknown	Unknown	13 Months	Yes - artist led	Creative Care programme : creative packages made by artists for families, teens and adults, art classes over Zoom.	Fullscope; Department of Healht and Social Care	Free for participants; Unknown	Cambridge; Peterborough	East England	0	"To encourage people to go out into the world around them, and reconnect with all their senses and with the pleasures of noticing, listening, making and shaping."	Working on Validated with a consultant	Independent evaluation currently underway led by arts and heritage consultant Anna Salaman	Feedback	Feedback: “All except one of the creativity boxes have been delivered and it was a delight to drop them round this morning. The children were absolutely thrilled and their parents really grateful. It really worked I thought, as a way to connect and engage with those families. I was feeling in bit of dip yesterday, with worry and feeling a bit fed up with the situation and what might happen next, …	COMPLETED: 357 packs; 698 downloads; 55 views; 12 packages developed; 13 online classes; community partnerships; social media campaign	http://www.cambridgecandi.org.uk/	CHWA - https://www.culturehealthandwellbeing.org.uk/how-creativity-and-culture-are-supporting-shielding-and-vulnerable-people-home-during-covid-19	R5	PHE > 10
Colchester & Ipswich Museums	Grey Literature (case study within wider report)	Cultural Asset Case Study	Socioeconomic	Deprivation - families	Families	Caregivers of children with special needs	1200 target (945 achieved)	Creative/Art	Posted, door to door	In your own time	ad hoc	16 Months (04/2020-08/2021)	No	Museum from Home: Creative activity packs sent out to participants, based on Ipswich musem collections.	CIMS, Arts Council England, Norfolk and Norwich Festival Bridge, Association for Suffolk Museums	Free for participants; Unknown	Colchester	East England	0	"We hoped to provide children and young people in Ipswich with creative activities to inspire them to engage with Ipswich Museums’ collections and offer a small distraction from anxieties they might be feeling due to COVID-19."	Feedback	Feedback: “Thanks so much, I know the families are very appreciative, as are we!” “we have had some amazing feedback from our vulnerable families... They loved the games and activity books.”	N/A	N/A	COMPLETED: The creation of activity packs for a range of groups – children aged 7 to 11, children with SEN, under 5s and young adults.	https://suffolkmuseums.org/taking-the-museum-to-our-community/	CHWA - https://www.culturehealthandwellbeing.org.uk/how-creativity-and-culture-are-supporting-shielding-and-vulnerable-people-home-during-covid-19	R6	PHE > 10
Coram	Grey Literature (case study within wider report)	Charity project	Socioeconomic	Deprivation - care	Careleavers	N/A	13	Creative/Art	Online, posted	2 hours	weekly	6 weeks May-June 2020	Yes - led by a teacher	Letters in Lockdown: Creative writing workshops for participants, letters are written to people who influence participants (idols), can include art, letters were to be posted after lockdown.	Royal Literary Fund	Free for participants; Unknown	National	National	0	"Combatting loneliness and improving mental health for isolated and vulnerable young people."	Evaluation questionnaire (unnamed)	Not published	Challenges and successes	Learning new technology; making high quality videos; time consuming	INTENDED: The pieces created will be exhibited and digitised versions included on our website	https://www.coram.org.uk/	CHWA - https://www.culturehealthandwellbeing.org.uk/how-creativity-and-culture-are-supporting-shielding-and-vulnerable-people-home-during-covid-19	R7	PHE > 10
Create	Grey Literature (case study within wider report)	Charity project	Socioeconomic	Deprivation - carers	Careleavers	People who are isolated/ housebound	47	Creative/Art	Online	3 hours	Once a week	4 weeks	Yes - run by professional artists	Reaching young carers: Photography, dance, drama and music workshops run by artists over 4 weeks of lockdown.	Arts Council England’s Emergency Response Fund	Free for participants; Unknown	National	National	0	"To give young carers respite from their caring responsibilities, boosted their confidence and creativity, and gave them a chance to connect with other young carers"	Evaluation questionnaire (unnamed)	Participants and artists rated the project overall at 100% success, also for technology, social skills and teamwork, participants rated 94% for creativity, 88% for artform skills, confidence, communication and wellbeing, artists rated 100% for everything.	Feedback	Feedback: “We’ve been having fun and learning how to play instruments. It has probably been the highlight of my quarantine. In quarantine, I don’t normally get to see my friends. Just seeing other people and knowing they’re all other young carers made me feel like it’s not just me. Create helps young carers because these opportunities would normally cost a lot of money. If there’s not much money …	COMPLETED: online exhibition; dance performance; radio drama performance	https://createarts.org.uk/2020/06/create-partners-with-honeypot-to-empower-young-carers-during-lockdown/	CHWA - https://www.culturehealthandwellbeing.org.uk/how-creativity-and-culture-are-supporting-shielding-and-vulnerable-people-home-during-covid-19	R8	PHE > 10
Creative Learning Guild	Grey Literature (case study within wider report)	Charity project	Socioeconomic	Deprivation - abuse	People experiencing abuse	People experiencing deprivation	2500 target (currently sent out to 1500)	Creative/Art	Posted	In your own time	ad hoc	Since April 2020	Yes - clinician approved	Arts Drop: Creative packs sent out to children to improve their wellbeing.	National lottery; calderdale metropolitcal borough council; Arts Council England	Free for participants; Unknown	Yorkshire and Humber	NE	0	"To provide clinician-approved creative activity packs that use arts and culture to boost wellbeing for the most vulnerable children."	Evaluation questionnaire (unnamed)	71% rated the packs at 10/10, 15% at 9/10 and 14% at 8/10. Social workers highlighted key themes that arose: universally positive reception, high quality content, immediate engagement in activity, promoted family activity, reducing stress, and catalysing new conversations with key workers.	Feedback	"They couldn't believe they could keep them. They couldn’t wait to use them." "Thanks for doing this and I hope that this scheme is repeated in the future"	COMPLETED: Therapeutic outputs; website; downloadable and printable activities	https://artsdrop.co.uk/	CHWA - https://www.culturehealthandwellbeing.org.uk/how-creativity-and-culture-are-supporting-shielding-and-vulnerable-people-home-during-covid-19	R9	PHE > 10
Doncaster Community Arts (DARTS)	Grey Literature (case study within wider report)	Charity project	Psychological	Mental Health	People with Anxiety Disorder	People with physical disabilities	130	Creative/Art	Online, over phone, posted	Unknown	Once a week	6 months 06-12/2020	Yes - led by poet/ broadcaster	Creative Directions: Visual art and poetry tutorials over Zoom, activity packs and books available, group sessions.	National Lottery Community Fund	Free for participants; Unknown	Yorkshire and Humber	NE	0	"To find practical ways for people to stay connected, motivated and inspired whilst at home, (without internet access) so they focus on positive outcomes and can still feel a sense of achievement."	Outputs counted	(See outputs)	N/A	N/A	INTENDED: 6 new books; delivery of the books into homes; For 45-50% of participants, going online wasn't an option.	https://wearedarts.org.uk/creative-directions-at-home-film/	CHWA - https://www.culturehealthandwellbeing.org.uk/how-creativity-and-culture-are-supporting-shielding-and-vulnerable-people-home-during-covid-19	R10	PHE > 10
Dream Time Creative	Grey Literature (case study within wider report)	Charity project	Socioeconomic	Community/ Isolated	People who are isolated or housebound	N/A	418 packs sent	Creative/Art	Posted, Facebook	In your own time	ad hoc	Since April 2020	No	Doorstep creations: Craft kits sent to participants; online exhibition of artwork	NOVA	Free for participants; Unknown	Yorkshire and Humber	NE	0	"This project was aimed at people who are lonely or socially isolated during the pandemic, so it was particularly focused on connecting people and giving them an activity that would help them to feel included, alongside expressing their creativity whilst having their voices heard."	Participant numbers	450 packs sent out	Challenges and successes	We are very proud of the project. It has been more successful than we ever thought. We have had to cap the kits now as we are getting more requests than we can budget for. People have been expressing their excitement and gratitude in emails for the creative distraction during this isolation and we have been touched by all of the participants’ voices. The engagement from participants has been wond…	INTENDED: online gallery of photographs	http://dreamtimecreative.org/	CHWA - https://www.culturehealthandwellbeing.org.uk/how-creativity-and-culture-are-supporting-shielding-and-vulnerable-people-home-during-covid-19	R11	PHE > 10
Escape Arts	Grey Literature (case study within wider report)	Charity project	Physical	Shielding	People who are shielding	N/A	10,000 leaflets posted	Creative/Art	Online, posted	In your own time	ad hoc	Since July 2020	No	The One Project: Creative packs for all ages, activities, post cards, publication printed and sent out.	Warwickshire County Council	Free for participants; Unknown	Warwickshire	West Midlands	0	"To Reduce beneficiary isolation and loneliness for the most vulnerable beneficiaries across a six-month period of self-isolation and social distancing through the provision of creative health interventions providing accessible online community and home activities, with access to Escapes wider mental health forum and one-to-one support. Promote place making, connecting communities during this per…	Working on Validated - Happiness Pulse	Not yet published	Case studies and impact statements	Not yet published	INTENDED: Distribution of 10k pamphlets. Support video tutorials. One piece of public artwork to be exhibited in two clinical centres.	http://www.escapearts.org.uk/projects-workshops/corona-response-projects/	CHWA - https://www.culturehealthandwellbeing.org.uk/how-creativity-and-culture-are-supporting-shielding-and-vulnerable-people-home-during-covid-19	R12	PHE > 10
Free Space Project	Grey Literature (case study within wider report)	Charity project	Physical	Shielding	People who are shielding	N/A	30	Creative/Art	Posted	In your own time	ad hoc	Since June 2020	Yes? - in partnership with GP pracctice	Free Space Project: Art boxes are delivered to patients; artwork is collected to display in a Kentish Town health centre.	National lottery	Free for participants; Unknown	Kentish Town	Greater London	0	"To provide something collaborative. Reducing feelings of isolation. Helping people that are bored. Encouraging creative expression."	Evaluation questionnaire (unnamed)	Survey asked patients to give 5 words to describe their shielding experience: "lonely, depressed, isolated and anxious" were most common	Challenges and successes	We had a number of responses within a matter of hours of the text messages being sent to patients. The survey results (asking patients to give us 5 words to describe their shielding experience) showed that people were feeling isolated, depressed, anxious and lonely. We hope that we can help change that.	COMPLETED: exhibition	https://www.freespaceproject.org/	CHWA - https://www.culturehealthandwellbeing.org.uk/how-creativity-and-culture-are-supporting-shielding-and-vulnerable-people-home-during-covid-19	R13	PHE > 10
Fun Palaces	Grey Literature (case study within wider report)	Charity project	Physical	Shielding	People who are shielding	People experiencing digital poverty	5000	Creative/Art	Online, printable for offline	Unknown	2-3 times a week	Since March 2020	No	Tiny revolutions of creation: Suggestions for how to connect with your community, or pass the time in isolation. Available online to be downloaded and printed to share with those who are offline (those who the organisation believes have been neglected by most organisations). Also extension in the Highlands - NHS highland mental health services - therapeutic creative activities were created to ben…	The National Lottery Community Fund; TNLCF and FEAST/CMP/Sheffield Theatres/SLIC	Free for participants; Unknown	National	National	0	"Supporting EVERYONE to take part in arts, culture &creativity, celebrating everyday creativity, celebrating creativity that is community-led (ie rather than specifically artist-led), encouraging those OFFline to take part and also to lead."	Challenges and successes	have received many emails, tweets etc of gratitude. Members of the public have sent us their own versions, which shows us that it works. Arts organisations have also used it to showcase their community work, sending us their ideas to share, all good. We perceive Fun Palaces to be a conduit and connector for community and arts/creativity workers, and this has certainly worked well in that way. Ver…	N/A	N/A	COMPLETED: Online sharing, offline sharing, people using the activities for their own communities	https://funpalaces.co.uk/1000-tiny/tiny-revolutions-of-connection/	CHWA - https://www.culturehealthandwellbeing.org.uk/how-creativity-and-culture-are-supporting-shielding-and-vulnerable-people-home-during-covid-19	R14	PHE > 10
Greater Manchester combined Authority	Grey Literature (case study within wider report)	Local Authority Museum case study	Socioeconomic	Deprivation	Care leavers	Older people	38000 kits sent out	Creative/Art	Posted	In your own time	ad hoc	Since March 2020	No	Creative Care Kits: Creative packs posted to vulnerable individuals, containing activites which can be done at home, mental wellbeing advice and phone numbers for support.	Paul Hamlyn Foundation Trafford Housing Trust Young Manchester Ambition for Ageing (Community Fund) Great Place (GMCA) project budget – from ACE and NHLF	Free for participants; Unknown	Manchester	NW England	0	"Combatting loneliness and isolation; Supporting wellbeing and mental health; A sense of purpose and social connectedness for volunteers assembling the kits; cultural organisations – working together for economy of scale and wider reach"	Working on Validated - Manchester Metropolitan University partnership	Not yet published	Challenges and successes	Unexpected successes • Supporting mental health of volunteers • Supporting mental health of cultural sector employees who are furloughed /freelancers as they felt a sense of purpose • New connections in districts between cultural organisations and voluntary sector, already leading to discussion on ways of working together in the future • Better connections between health and social care and cultu…	Not stated	https://www.greatermanchester-ca.gov.uk/media/3020/creative-care-kit-young-people.pdf	CHWA - https://www.culturehealthandwellbeing.org.uk/how-creativity-and-culture-are-supporting-shielding-and-vulnerable-people-home-during-covid-19	R15	PHE > 10
Live Music Now	Grey Literature (case study within wider report)	Charity project	Socioeconomic	Several	Older adults	Disabled people	Unknown	Creative/Art	Online, posted	access at home	ad hoc	Since April 2020	Yes - professional musician led	Live Music Now at Home: Prerecorded concerts available online or can be posted as a DVD; participatory music sessions.	Rayne Foundation, the Utley foundation; Youth Music	Free for participants; Unknown	England, Wales, NI	National	0	"As well as providing fun, enjoyable entertainment experiences that otherwise would not happen in the current context, we are aiming to support mood and engagement in older people in care, including people living with dementia; Raise morale for people working care homes as well as supporting their skills and confidence in leading music activities; Combatting loneliness and isolation; Supporting w…	Evaluation questionnaire (unnamed)	Not yet published	Case studies and impact statements	Many case studies published on website	COMPLETED: Live music videos; music sessions; dvds; 'how to' films	https://www.livemusicnow.org.uk/case_studies	CHWA - https://www.culturehealthandwellbeing.org.uk/how-creativity-and-culture-are-supporting-shielding-and-vulnerable-people-home-during-covid-19	R16	PHE > 10
Luv2MeetU	Grey Literature (case study within wider report)	Charity project	Psychological	Learning Difficulties / Autism	People with Learning Difficulties / Autism	LD	60	Social	Online	Several every week	several - 1 hour-2 hours	6 months - June to december 2020	No	Friendships and relationships by Luv2MeetU: Dating service, has suspended in person meeting but instead offers online activities such as video chat, daily live video check-ins, a closed 'safe space' Facebook group, virtual quizzes, games, group calls craft, pen-pals and one on one support.	Creative Minds; HFT	Membership fee waived (unknown)	Yorkshire and Humber	NE	0	"Reduced need to access primary/secondary health care • The project will link with learning disabilities services and other Creative Minds partners • Reduce the negative impact of social distancing on people with learning disabilities, who are already more likely to experience feelings of loneliness and isolation • Increase individuals confidence and knowledge of using telephone and digital techn…	Outputs counted	(See outputs)	Challenges and successes	Members are enjoying the virtual events and the opportunity to link up with other people online and join in with new activities; which has resulted in new friendships being developed. There will always be the need for face to face social events when it is safe to do so, however we plan on continuing some level of virtual activities within Luv2meetU following the pandemic, as this has been hugely …	INTENDED: 20 virtual group sessions; FB papge; weekly calls; social events; peer support	https://www.hft.org.uk/our-services/empowering-individuals/friendship-and-dating/luv2meetu/luv2meetu-membership/	CHWA - https://www.culturehealthandwellbeing.org.uk/how-creativity-and-culture-are-supporting-shielding-and-vulnerable-people-home-during-covid-19	R17	PHE > 10
Look Again	Grey Literature (case study within wider report)	Charity project	Psychological	Mental Health	People who are Isolated/ housebound	People experiencing abuse	600	Creative/Art/Nature	Online	Unclear	Weekly/ Daily	18 months (01/2020-06/2021)	Yes - MH professional led	Seeing with fresh eyes/ Reframe your now: Nature and creative activities: photography, mindfulness, positive thinking, an exhibition at the end.	BUPA UK; National Lottery	Free for participants; Unknown	(online) Gloucestershire	(online) SW England	0	"Supporting mental health and general wellbeing; Developing a more positive mindset; Combatting loneliness by connecting with new people online; Learning new skills in photography, mindfulness and connecting with nature; Building resilience; Focusing on the now and what is right with one’s life; Telling a positive story through photography; Staying calm and connected and getting creative at home"	Working on validated measurements with the University of Gloucester	Not yet published	Feedback	Feedback: “I have now got several tools I can use on a daily basis to help myself through times and moments of anxiety and change. I've learned that being able to really become present is a gift of self-healing. The course really has helped me see that I can constantly 're-frame' my present situation - see it differently, see it creatively, but also accept it. I hope to use mindful photography fo…	Not stated	https://www.look-again.org/reframeyournow	CHWA - https://www.culturehealthandwellbeing.org.uk/how-creativity-and-culture-are-supporting-shielding-and-vulnerable-people-home-during-covid-19	R18	PHE > 10
Magic Me	Grey Literature (case study within wider report)	Charity project	Physical	Shielding	Older adults	Families with children	171	Creative/Art/Nature	Online	Several every week	Several	4 months (04-08 2020)	No	The After Party: A series of activities based on windows, and interactions between the two target groups. The two groups share their creative work with each other over video chats.	Arts Council England, French Huguenot Church of London Charitable Trust, Hammersmith United Charities, Salter Charitable Trust, Westminster Amalgamated Charity, The Expat Foundation.	Free for participants; Unknown	Greater London	Greater London	0	"Continued intergenerational community networks, reduced social isolation for younger and older people, improved wellbeing through creative activity."	Working on Validated - commissioned a report by NAPA	Not yet published	Feedback	Feedback: From care staff “The postcards activity hit a note with the residents, we have sent some out to our volunteers - from Magic Me and others. The legacy of this still goes on and we are still making them. It allows the residents to think about the outside.” “Activities being received well, esp with 5 residents in particular engaging – most that are living with dementia. Staff capacity is v…	INTENDED: 3 x Cocktail Hour – once a month activity online for volunteers to socialise with each other, Magic Me staff and Magic Me artists. 4 x newsletters sent do care homes with creative activities for residents to respond to. 4 x care packages sent to each of the 9 care homes/schemes (for max 15 residents in the care homes). 6 x newsletters sent to pool of Cocktails in Care Homes volunteers	https://magicme.co.uk/project/the-view-from-here/	CHWA - https://www.culturehealthandwellbeing.org.uk/how-creativity-and-culture-are-supporting-shielding-and-vulnerable-people-home-during-covid-19	R19	PHE > 10
National Archives	Grey Literature (case study within wider report)	Public Service Project	Socioeconomic	Deprivation - BAME	BAME	N/A	Unknown	Creative/Art	Online	In your own time	ad hoc	Ongoing - since March 2020	Yes - archivist led	An online archive of information, including audio clips and pictures, about 5 places to promote creativity and discussion among individuals and groups. It also aims to connect people with their cultures.	The National Archives	Free for participants; Unknown	National	National	0	"Aiming to help BAME and white vulnerable adults to feel more connected with each other, to learn about different places in the world and people’s memories of them, to spark conversations that inform and entertain. "	Challenges and successes	Creating a resource differently has been the biggest challenge. Normally I would co-develop a resource by trialling this directly with individuals who know and trust me. The loss of face to face interaction where you build trust is a big impediment. Instead, I am working with ‘gatekeepers’ to help identify what will work. Working with new technological challenges is also challenging as is the nee…	N/A	N/A	INTENDED: a) A mindfulness activity available for all. b) An online resource that encourages reminiscence and discussion about what people have in common as well as exploring difference c) Letters to encourage a sense of contact with the outside world for people isolated in care homes	https://blog.nationalarchives.gov.uk/the-art-of-kindness-using-images-to-improve-mental-wellbeing/	CHWA - https://www.culturehealthandwellbeing.org.uk/how-creativity-and-culture-are-supporting-shielding-and-vulnerable-people-home-during-covid-19	R20	PHE > 10
Museum of London	Grey Literature (case study within wider report)	Charity project	Physical	Dementia	People with Dementia	N/A	1500	Creative/Art	Online, posted	Several every month	Monthly - several outputs	April - December 2020	No	A range of wellbeing resources created in order to combat loneliness, as well as a monthly podcast, singing, creative practice for movement, partnering with artists, and printed activity packs for people with lower income.	GLA	Free for participants; Unknown	Tower Hamlets, Islington, Brent, Bromley, Camden, Greenwich, Hackney, Lewisham, Newham, Redbridge, Southwark, and Waltham Forest.	Greater London	0	"To create connection to others and to the story of London"	Working on Validated - 509 Arts	Not yet published	Feedback	Feedback: ‘Keep up the great work, not easy to create meaningful content during the Lockdown but you have!’ ‘We are encouraging people to take up your activity packs as they are brilliant and will help keep people engaged and active at home.’ ‘Thank you for putting this all together and leading on accessible Arts and Culture for people living with Dementia in London..., apart from Southbank Centr…	INTENDED: We work with those living with dementia to co-create a monthly podcast – London Lives. We are also collating memories around objects to populate a new London Lives webpage. Our paper activity packs encourage people living with dementia to share their responses with us. We also deliver online events – monthly live sessions with an artist. We are also planning a socially distanced festiva…	https://www.museumoflondon.org.uk/memories/creative-connected/june-2020	CHWA - https://www.culturehealthandwellbeing.org.uk/how-creativity-and-culture-are-supporting-shielding-and-vulnerable-people-home-during-covid-19	R21	PHE > 10
Open Art Box CIC	Grey Literature (case study within wider report)	CIC project	Physical	Dementia/ Parkinsons	People with Dementia/ Parkinsons	Caregivers of people with dementia/parkinsons	30	Creative/Art	In your own time	In your own time	Twice a week check ins	Since April 2020	No	Every week a box of art supplies and an instruction kit is delivered to participants. At the end of the week, a phone call is arranged with the participant and the artwork is displayed in the window. Art is tailored to the needs of the participants.	Hertfordshire Community Foundation; Local Giving Appeal	Free for participants; Unknown	Hertfordshire	East England	0	"Our key aim in providing these packs is to help people stay well, motivated and purposeful, through an extremely challenging time. We are using these packs as an opportunity to enable and encourage creativity, support their wellbeing and make them feel valued."	Evaluation questionnaire (unnamed)	Not yet published	Feedback	Feedback: "Each week we provide a feedback sheet for our participants to fill in if they would like. They also sign a photo consent form if they are happy for us to share images of themselves and their work. We also receive verbal feedback when phoning and delivering."	INTENDED: Exhibition	https://www.openartbox.org.uk/	CHWA - https://www.culturehealthandwellbeing.org.uk/how-creativity-and-culture-are-supporting-shielding-and-vulnerable-people-home-during-covid-19	R22	PHE > 10
RAMM@Home	Grey Literature (case study within wider report)	Local Authority Museum case study	Physical	Shielding	People who are shielding	People who are isolated/ housebound	500 packs distributed	Creative/Art	Online	Several every week	Several	Since May 2020	No	Weekly art challenge to allow people to create their own 'museum collection' at home based on museum's objects, such as Drawing sessions, animation, origami, model making.	Exeter City Council	Free for participants; Unknown	Exeter	SW England	0	"We started this project as an online activity for people during lockdown but we quickly became aware that there were lots of people who were unable to get online so we wanted to reach out and make sure they could access the material and get creative at home anyway."	Evaluation questionnaire (unnamed)	Not published	Feedback	Feedback: "“It made our day, thank you, we miss RAMM” “Lovely surprise, we enjoyed. Massive thank you!” “I enjoyed drawing Gerald the giraffe!”	COMPLETED: exhibition	https://rammuseum.org.uk/young-visitors/fun-things-to-do/rammhome/	CHWA - https://www.culturehealthandwellbeing.org.uk/how-creativity-and-culture-are-supporting-shielding-and-vulnerable-people-home-during-covid-19	R23	PHE > 10
The Reader at Home	Grey Literature (case study within wider report)	CIC project	Socioeconomic	Several	Older adults	People with addiction	7000	Creative/Art	Online, over phone, posted	Several every week	Twice a week	Since March 2020	No	Delivering shared reading to people online and over phone, shared reading sessions online, support sessions for sharing ideas and experiences as well.	Arts Council England, People’s Postcode Lottery and National Lottery Community Fund	Free for participants; Unknown	National	National	0	"Shared Reading brings people together. It connects people to literature and each other, and substantially increases their wellbeing and mental health. "	Feedback	Feedback: “Last week, having waited for the 93 year-old to be set up with a laptop, we met up online to read a short poem together, and we ended up reading and talking for over an hour. There was great excitement at being able to speak to each other 'in person' as many of the group hadn’t been in touch with each other since lockdown began. The 93 year-old phoned her son the following day to say h…	Challenges and successes	Challenges: Finding alternative ways to communicate and reach individuals; new ways of working; digital poverty. Successes: participant retention and enjoymment, learning new ways to work with participants	COMPLETED: reading groups, online sessions, activity pack	https://www.thereader.org.uk/get-involved/the-reader-at-home/	CHWA - https://www.culturehealthandwellbeing.org.uk/how-creativity-and-culture-are-supporting-shielding-and-vulnerable-people-home-during-covid-19	R24	PHE > 10
Royal central school of speech and drama	Grey Literature (case study within wider report)	Cultural Asset Case Study	Socioeconomic	Community/ Isolated	People who are isolated or housebound	N/A	66	Creative/Art	Online, posted	Unclear	Unclear	2020 academic year	Yes - professional led	Online creative community for unpaid carers, also wellbeing project for older tenants in Harningey - letters and resource packs, music and film.	Royal central school of speech and drama	Free for participants; Unknown	Camden	Greater London	0	"Visibility to unpaid carers and/or artists • Bringing awareness about Camden Carers as a charity • Helped address loneliness and isolation in the context of lockdown online to make the process more important than the end goal • Wanted to learn and continue work as artists"	Feedback	Feedback: "The arts and identifying unpaid carers have a lot creativity to give and that’s brought out more in partnership working with yourselves especially in lockdown for caring for carers. It really gave people the opportunity to speak out and tell this story about how difficult life can be in lockdown for unpaid carers. Carers felt underrepresented amongst key workers and paid carers but in …	Challenges and Successes	Challenges: engagement; establishing contact Successes: intergenerational approach with grandparents and students; impact of memories being used in plays, bearing witness commemorate the memory	COMPLETED: Camden Carers: Activities varied between 10mins – 30mins • Created Forum story starter tasks • Twitter resources links to how to be creative and easy art projects to try at home • Masterclasses moving meditation • storytelling • creative writing • song writing • how to record using your phone • warm-up guide for concentration, physical activity and emotional wellbeing tasks pamphlet pr…	https://www.camdencs.org.uk/	CHWA - https://www.culturehealthandwellbeing.org.uk/how-creativity-and-culture-are-supporting-shielding-and-vulnerable-people-home-during-covid-19	R25	PHE > 10
Art By Post	Grey Literature (case study within wider report)	Cultural Asset Case Study	Physical	Dementia	People who are shielding	People experiencing digital poverty	1700	Creative/Art	Posted	In your own time	Once	Since April 2020	No	Art by post scheme: Free craft, poetry and drawing booklets delivered to participants.	Paul Hamlyn Foundation	Free for participants; Unknown	National based in London	National	0	"We hope that taking part in the poetry, drawing and craft activities will help to keep participants’ minds active, provide something to look forward to and talk about with friends, family and carers, and boost their mental health and wellbeing."	Working on validated measurements - PERMA	Are completing evaluation using the PERMA model for wellbeing, but these results are not available for public viewing.	Feedback	Feedback: One dementia charity has told us that the resources have provided a great opportunity to touch base physically with some of their most isolated people with dementia and their carers. We also heard that the booklets have given their participants a real sense of purpose and excitement at the thought of possibly having their work displayed in an exhibition at the Southbank Centre.	COMPLETED: Art packs and freepost envelopes; Exhibition	https://socialprescribingacademy.org.uk/southbank-centre-art-by-post/	CHWA - https://www.culturehealthandwellbeing.org.uk/how-creativity-and-culture-are-supporting-shielding-and-vulnerable-people-home-during-covid-19	R26	PHE > 10
Around the Table	Grey Literature (case study within wider report)	Charity project	Physical	Shielding	People who are shielding	Carers of people who are shielding	39	Creative/Art/Nature	Online, over phone, posted	Unclear	Unclear	Unclear	Yes - led by artists and chefs	Creative sessions around food, creativity and culture: Examples include edible flower gardens, foraging workpacks, etc.	Suffolk Community Foundation, Awards for All, Ganzoni Charitable Trust, The Scarfe Charitable Trust	Free for participants; Unknown	Suffolk	East England	0	"Increased wellbeing; Reducing isolation; Increasing confidence and skills"	Feedback	Feedback: "Thank you so much for my edible flower garden pack. This has cheered me so much. Had a difficult day yesterday and to receive these this morning has really made feel better. In all this madness it's easy to feel forgotten."	Challenges and successes	Working collaboratively; working with artists from outside suffolk; ;but resources needed; barriers to participation; takes lot more people power to keep in touch	INTENDED: Fashion show and exhibition	https://www.suffolkartlink.org.uk/around-the-table-at-home-begins/	CHWA - https://www.culturehealthandwellbeing.org.uk/how-creativity-and-culture-are-supporting-shielding-and-vulnerable-people-home-during-covid-19	R27	PHE > 10
Theatre Orchard	Grey Literature (case study within wider report)	Charity project	Physical	Shielding	Hospital patients	Families of hospital patients	20000	Creative/Art	Online, posted	In your own time	In your own time	Since April 2020	No	Theatre Lounge/ chapter one/holidaying at home/ creative ease/ boredom buster: Activities to reach out to people and provide entertainment;drama and writing projects, holidaying at home, poetry events, 'theatre lounge'.	Arts Council NPO; Quartet community foundation; Without walls; privaate donation; UBHW; NPAG	Free for participants; Unknown	Somerset	South West England	0	"Combatting loneliness Supporting positive mental health Building new skills Awakening new interests Preventing boredom Supporting positive family activity Enabling routes for self-expression and peer support"	Feedback	Feedback: "We have had really great feedback. What has worked particularly well is maintaining in-depth communication with communities where we have pre-existing links and have established a sense of trust. Whilst we have created a range of resources for wider population (writing films, films about play, singing resources etc."	N/A	N/A	COMPLETED: Virtual festival; zoom events; boredom buster kits	https://www.theatreorchard.org.uk/	CHWA - https://www.culturehealthandwellbeing.org.uk/how-creativity-and-culture-are-supporting-shielding-and-vulnerable-people-home-during-covid-19	R28	PHE > 10
Tees, Esk and Wear Valley NHS Trust	Grey Literature (case study within wider report)	Public Service Project	Psychological	Mental Health	People with mental health issues	NHS Staff	40	Creative/Art	Online	Unclear	Once a week	4 Months june - october 2020	N/A	Music & Wellbeing website; Wellbeing Live events: Playlists and videos designed to relax, manage moods, etc. X-system used to predict emotional impacts of sounds. Playlists can be targeted at specific issues such as depression, and trauma. There are also live events online.	Pro Bono	Free for participants; Unknown	Caulderdale, West Yorkshire	North East England	0	"Musical self-care in mental health and general wellbeing; in the Wellbeing Live events we offer connectedness, community and uplift."	Validated measurements	Regression models used in SPSS: Relaxing X-system songs reduced arousal states, and livening ones increased activity. Predictions of valence and physical wellbeing were significant. Appropriately curated and calibrated music playlists may lead the listener by entrainment to positive relaxation, to activation states or positive mood change that may have health benefits. Also in evaluation improvem…	Challenges and Successes	"The challenges were initially around developing a new form of engagement with music via the wellbeing live events. We did not have a production team to support and managed with the determination of one of our team. We have become slicker in our delivery and now have a Facebook page, a standard flyer with circulation list and a standard format which flows well. The initial challenge of time of wo…	COMPLETED: Website	https://www.recoverycollegeonline.co.uk/music-for-wellbeing/	CHWA - https://www.culturehealthandwellbeing.org.uk/how-creativity-and-culture-are-supporting-shielding-and-vulnerable-people-home-during-covid-19	R29	PHE > 10
Creative Minds	Grey Literature (case study within wider report)	Charity project	Psychological	Wellbeing	Women	People with mental health issues	40	Creative/Art	Online, over phone	Unclear	Weekly	4 Months June- Octobre 2020	N/A	Behind the Mask: Focuses on improving the quality of life for women through creative methodology - weekly art sessions with something creative- e.g., singing, visual art, breathing exercises. There is also support available through Wattsapp or video chat.	SWYPFT	Free for participants; Unknown	N/A	Yorkshire and Humber	0	"To foster improved self-confidence, reduce stress / negative feelings, build group dynamic, new friendships and peer support."	Feedback	"Behind the Mask is the only place I have been where women from different backgrounds come together and learn such a lot from each other. Really – it has opened my eyes and made me realise that as an Asian women, I feel that Asian communities are already isolated – they need to be mixed in different culture – everybody’s problems are the same and we learn more when it is a mixed group.”	N/A	N/A	COMPLETED: Pnline sessions; whatsapp groups, zoom calls, tailored and ad hoc support	http://www.verddegris.org/project/many-voices-behind-the-mask/	CHWA - https://www.culturehealthandwellbeing.org.uk/how-creativity-and-culture-are-supporting-shielding-and-vulnerable-people-home-during-covid-19	R30	PHE > 10
Edinburgh Arts Festival	Public Domain	Resource	All	Families	Everyone in the community	N/A	N/A	Creative/Art	Online	N/A	N/A	1 month (July-August 2020)	Yes - Artist led	Downloadable art packs which can be completed at home.	Charity funded	Free for participants; Unknown	National	National	0	"The instructional creativity kits give insight into an artist's practice, showing how you can use their processes and techniques to create your own unique artwork. Keep an eye out as we release more activities over the coming weeks."	No evaluation	The organisation has not completed evaluation, or at least not that can be seen by the public.	N/A	N/A	N/A	MARCH Network	https://www.edinburghartfestival.com/about/learning-and-engagement	R31	PHE<10
Arts and Minds	Public Domain	Charity project	Psychological	Mental Health	People with mental health issues	N/A	N/A	Creative/Art	Online, posted	Several every week	Several			Creative packs and virtual events have been made.				Cambridgeshire	0	N/A	Informal qualitative	No evaluation, although resources demonstrating the success of the arts in improving mental wellbeing are available on their website, supporting the success of the organisation. (Example: link to report link)	N/A	N/A	N/A	MARCH Network	https://artsandminds.org.uk/index.html	R32	PHE<10
The Reader	Public Domain	Charity project	Socioeconomic	Several	Everyone in the community	N/A	N/A	Creative/Art	Online		Weekly			Free reading packs and live reading events for people of all ages. There is a phone call service for people who want to talk.				National	0	N/A	Evaluation questionnaire (unnamed)	No evaluation done for resources created by the organisation for covid, but activities created prior to the pandemic were found to make 93% of participants 'feel better' and 84% made new friends. Also 98% stated that shared reading was good for family, 94% said it gave them a sense of achievement, and 84% self-reported that it had improved their wellbeing.	N/A	N/A	N/A	MARCH Network	https://www.thereader.org.uk/get-involved/the-reader-at-home/	R33	PHE<10
Heart n Soul	Public Domain	Charity project	Psychological	Learning Difficulties / Autism	People with Learning Difficulties	People with Autism/ Autistic people		Creative/Art	Online	Several every week	Several			Creative arts charity which holds virtual mixers and events, as well as offering downloadable creative packs for home. There is also a radio show and music.				Deptford	0	"We believe in the power and talents of people with learning disabilities, providing opportunities for people to discover, develop and share this power and talent as widely as possible. We also have a lot of fun! "	Qualitative impact report	Although no evaluation has been done since the pandemic, the impact report for 2018-19 is available online. This displays stories of participants and volunteers, and the reach of the organisation, but no evaluation appears to be done for the wellbeing impact.	N/A	N/A	N/A	MARCH Network	https://www.heartnsoul.co.uk/about	R34	Cochrane - Bronze
Art Branches Creative Challenge	Public Domain	Charity project	Socioeconomic	Community/ Isolated	Everyone in the community			Creative/Art/Nature	Online, Facebook			30 day	Yes - artist led	30 day creative challenge to keep people active during isolation. The challenges are released on Facebook, each day there is a challenge for you to do from your home/garden. Participants can share their work online. The challenges link people to environment through creative work.				East England	0	N/A	No evaluation	There is no evaluation of this project, and there appears to be little engagement with it, with few comments and likes on Facebook, and only 1 person sharing their work.	N/A	N/A	N/A	MARCH Network	https://www.facebook.com/pg/Art-Branches-Creative-Challenge-109960313983976/about/?ref=page_internal	R35	PHE<10
The Wildlife Trusts	Public Domain	Charity project	Socioeconomic	Deprivation - asset poor	People in asset poor areas			Nature	Online					Webcams set up in natural environments for people at home to watch wildlife.				National	0	N/A	No evaluation	There is no evaluation for this project's success.	N/A	N/A	N/A	MARCH Network	https://www.wildlifetrusts.org/webcams	R36	PHE<10
Pathways to Wellbeing	Public Domain	Charity project	Psychological	Mental Health	People with mental health issues	People who are isolated/ housebound		Creative/Art	Online	Several every week	Several			Downloadable activity sheets to inspire people to create at home, inspired by Holborne Museum's objects and paintings. This is less aimed at the organisation's normal target group of homeless people, and more aimed towards the other two groups.				Bath	0	N/A	No evaluation currently	There is no evaluation for the activity sheets, although for the organisation's work in general (2016-2019), which explores creativity and engagement with objects, found through feedback forms that 80% of people found the program improved their wellbeing.	N/A	N/A	N/A	MARCH Network	https://www.holburne.org/learning/community-engagement/pathways-to-wellbeing/activities/	R37	PHE<10
Small Things Creative Project	Public Domain	Charity project	Physical	Dementia	Older adults	People with Dementia		Creative/Art	Online	Several every week	Several		Yes - artist led	The Storybox Project: creative activity packs and video calls to care homes, where participants will do creative work together using their imaginations, such as poetry, music and art. The work is shared online in order to be viewed by others for donation.				National	0	N/A	No evaluation	There is no evaluation from the organisation, but it likely to be successful because of literature on creativity and wellbeing.	N/A	N/A	N/A	MARCH Network	https://smallthings.org.uk/	R38	PHE<10
Wiltshire Creative	Grey Literature (case study within wider report)	Cultural Asset Case Study	Socioeconomic	Community/ Isolated	Families	N/A	80	Creative/Art	Online, pick-up in Salisbury	In your own time	One weekend	One Weekend during lockdown	No	Hey Clay!: Clay packets and worksheets available for pickup. Worksheets also downloadable. The worksheets are stilll available but clay packets are not.	Wiltshire Creative	Free for participants; Unknown	Wiltshire	South West England	0	"Promoting creativity, enabling access to clay as creative material, connecting in a positive and creative way with our community."	Challenges and successes	Initially we gave out around 35 packs but these disappeared in matter of minutes and we had to create more packs in order not to disappoint. All was performed observing the social distancing rules. My impression was that people were in desperate need to engage in creative activity and that they knew that this activity will bring value and enjoyment to them.	N/A	N/A	COMPLETED: Hey Clay weekend	https://www.wiltshirecreative.co.uk/uploads/publications/320.pdf	CHWA - https://www.culturehealthandwellbeing.org.uk/how-creativity-and-culture-are-supporting-shielding-and-vulnerable-people-home-during-covid-19	R39	PHE > 10
Yorkshire Dance	Grey Literature (case study within wider report)	Charity project	Socioeconomic	Older	Older adults	People who are isolated/ housebound	150; 10k views	Music	Online	Unclear	weekly	Since June 2020	No	Dance On: Online video dance sessions and phone calls, with the aim to improve health and mental wellbeing, as well as offering social interaction.	Sport England & Public Health Bradford & Leeds	Free for participants; Unknown	Leeds Bradford	NE	0	"Supporting physical health, encouraging social inclusion, combatting loneliness, connecting people who know each other and making new friends."	Working on validated	The University of Leeds is the research partner and for the (physical sessions) used a combination of ways of gathering data including wearable technology, questionnaires and focus groups. Some of the key headline stats from pre-lockdown have been very encouraging and we are hoping to publish the research in the autumn. Health economic data was also gathered from participants and again looks like…	Feedback	Feedback: "Each week we provide a feedback sheet for our participants to fill in if they would like. They also sign a photo consent form if they are happy for us to share images of themselves and their work. We also receive verbal feedback when phoning an	COMPLETED: Online classes and workshops	https://yorkshiredance.com/project/dance-on/	CHWA - https://www.culturehealthandwellbeing.org.uk/how-creativity-and-culture-are-supporting-shielding-and-vulnerable-people-home-during-covid-19	R40	PHE > 10
University of Cambridge Museums	Grey Literature (case study within wider report)	University museum programme case study	Socioeconomic	Older	Older adults	People who are isolated/ housebound	250	Music	Online, over phone, posted	Unclear	Weekly	Since 2017	Yes - cled by professional dance artist	Time and Dance: Invites participants to look slowly, move, and learn exploring shared journeys. Also available are: telephone calls, art films, postcards and art packs sent out, blog posts.	National Lottery Community Fund; Cambridge City Council; Arts Council England	Free for participants; Unknown	Cambridge	East England	0	"Contribute to the psychosocial wellbeing of older people living in Cambridgeshire particularly those likely to be affected by loneliness and social isolation; To shift perceptions of the Museum –to enable participants to see it as a place for everyone as co-creators of a social and cultural community."	Working on validated	Working with Anglia Ruskin university on independent evaluation	Feedback	Feedback: "I’m struggling now; I’m having a really tough time. It’s been good to escape into this painting (where) we’d go together to the bottom of the hills and slowly climb to the top and it would be fresh air, freedom."	COMPLETED: Phone calls; zoom calls; art fil,s' postcards/posters' art packs	https://www.culturehealthandwellbeing.org.uk/sites/default/files/2020-07/Case%20study%20-%20University%20of%20Cambridge%20Museums%20-%20Time%20%26%20Dance.pdf	CHWA - https://www.culturehealthandwellbeing.org.uk/how-creativity-and-culture-are-supporting-shielding-and-vulnerable-people-home-during-covid-19	R41	PHE > 10
Outdoors for All	Public Domain	Social Prescribing Resource	Socioeconomic	Deprivation - asset poor	People in asset poor areas	N/A	N/A	Creative/Art/Nature	Online	N/A	N/A	N/A	N/A	An organisation which is trying to address the needs for access to nature, the barriers for vulnerable people when it comes to reaching nature, and design projects to improve nature services.	N/A	Free for participants; Unknown	N/A	National	0	"To bring together environmental and voluntary organisations, through a blog webiste which people can add to, sharing ways of engaging with nature."	No evaluation	The organisation has not completed self-evaluation, and no feedback is available also. The website design is confusing and has not been updated since 2016, which suggests it is not a success. However, the idea behind it is promising, and it has potential to help people engage with the natural environment.	N/A	0	N/A	MARCH Network	https://outdoorsforallweb.wordpress.com/	R42	PHE > 10
Aspex	Grey Literature (case study within wider report)	Charity project	Physical	Dementia	People with Dementia	Caregivers of people with Dementia	12 at a time	Creative/Art	Online, face to face via carers	Unclear	Unclear	Unclear	Unclear	Generate: a weekly prpgramme of art workshops for people with Dementia	ACE Catalyst Evolve & The Rayne Foundation	Free for participants; Unknown	Porstsmouth/ Hampshire	South West England	0	"Our project has a focus of improving health and wellbeing and combatting loneliness"	No evaluation but anecdotal evidence	we have posted materials to all our participants to enable working from home and we also offer telephone & post exchanges for those who do not have digital access.	N/A	N/A	COMLPETED: workshops; exhibition; celebration event	https://www.aspex.org.uk/whats-on/participation/aspex-at-home-generate/	CHWA - https://www.culturehealthandwellbeing.org.uk/how-creativity-and-culture-are-supporting-shielding-and-vulnerable-people-home-during-covid-19	R43	PHE > 10
Celebrating Age Wiltshire	Grey Literature (case study within wider report)	Cultural Asset Case Study	Socioeconomic	Older	Older adults	N/A	10 community areas?	Creative/Art	Online, over phone, posted	Several every month	Several	5 years between 2020-2025	No	CAW is a health and wellbeing project which uses arts, heritage, culture and creativity as a vehicle to improve or maintain the health and wellbeing of older people	Arts Council England; The National Lottery Community Fund, Wiltshire Council Area Boards, Wiltshire and Swindon Community Foundation, Goldsmiths Charity	Free for participants; Unknown	Wiltshire	South West England	0	"Reaching isolated older people who haven’t engaged in quality arts and cultural activity/events for a long time/before."	Feedback	Feedback: "The residents at Wiltshire Heights have been thoroughly enjoying themselves experiencing the concerts in the comfort of the home. It’s great that at this really testing time, there is still plenty of pleasure to be found – long may the Celebrating Age Wiltshire programme continue! I think what you are doing is amazing! "	N/A	N/A	COMLPETED: Events, concerts, small scale theatre, poetry readings, creative writing and poetry sessions, art workshops, singing, seated dance sessions, exhibitions of work created during activity, online concerts and events.	https://www.wiltshiremusic.org.uk/learn-take-part/celebrating-age	CHWA - https://www.culturehealthandwellbeing.org.uk/how-creativity-and-culture-are-supporting-shielding-and-vulnerable-people-home-during-covid-19	R44	PHE > 10
Butterflies/ Creative minds	Grey Literature (case study within wider report)	Charity project	Physical	Dementia	Older adults	People with Alzheimers	100	Creative/Art/Nature	Online, over phone	Several every month	Several	Since March 2020	No	Butterflies is a registered charity. It provides exercise classes to people with dementia and Alzheimer’s; change of working practice as a result of Covid	Coalfields Regen Trust, SYFCT Covid fund, Making Space, Barnsley Council, Ward Alliance Covid fund and Persimmons Homes Covid fund.	Free for participants; Unknown	Yorkshire and Humber	NE	0	"We want to provide an overall package which includes physical and mental wellbeing for participants whilst also supporting their carers."	Feedback	Feedback: "People we contact are extremely appreciative of the contact made and now enjoy lengthy conversations which often is the only link with other people. They are able to express any concerns and request help when needed after gaining the trust from the person making regular contact."	Challenges and successes	"We are delighted in how the project has been received by our members/participants. All volunteers and service workers making this regular contact have gained excellent feedback from the persons they speak to, often getting remarks stating they are often the only link to the outside world. The challenges we are now facing with this service is the lack of time we have due to the lengthy conversati…	COMPLETED: Online and downloadable content, doorstep deliveries leading back to face to face events when safe to do so.	https://fsd.barnsley.gov.uk/kb5/barnsley/fisd/service.page?id=Cl-nTuTe2p4	CHWA - https://www.culturehealthandwellbeing.org.uk/how-creativity-and-culture-are-supporting-shielding-and-vulnerable-people-home-during-covid-19	R45	PHE > 10
Christchurch belles (WI)	Grey Literature (case study within wider report)	Project case study	All	Wellbeing	Women (WI)	People who are isolated/ housebound	20	Creative/Art	Online	Unclear	Weekly	Since April 2020	No	Crafty Corner: Monthly craft club turned online sewing scrubs, face masks, scrub bags, hair bands, ear savers for NHS staff	Self-funded	Membership fee	South West	South West England	0	"We hoped to combat isolation and loneliness within our own membership but also within the community."	Challenges and successes	"Attendees enjoy the opportunity to meet virtually and share their experiences and ideas. We feel this has worked well, allowing us to maintain contact with friends and fellow members and enjoy craft challenges alongside supporting out local community. The main challenge has been the technology – getting everyone set up and familiar with Zoom, and the interaction with local broadband services and…	N/A	N/A	COMPLETED: online Gallery	https://www.culturehealthandwellbeing.org.uk/sites/default/files/2020-07/Case%20study%20-%20Christchurch%20Belles%20WI.pdf	CHWA - https://www.culturehealthandwellbeing.org.uk/how-creativity-and-culture-are-supporting-shielding-and-vulnerable-people-home-during-covid-19	R46	PHE > 10
Denbighshire Leisure Ltd	Grey Literature (case study within wider report)	Cultural Asset Case Study	Physical	Dementia	People with Dementia	People with Dementia	90	Creative/Art	Online, over phone	Several every month	Various	Since April 2020	No	Denbighshire Leisure Ltd’s Community Arts Programme, Lost in Art: Visual arts project aimed at people living with dementia, along with their family carers.	Arts Council of Wales and Denbighshire County Council	N/A	Denbighshire	Wales	0	"The aim of the project is to explore the role of the visual arts in addressing issues which can affect people living with dementia and other mental health conditions, including social isolation, confidence, communication, lack of independence and quality of life and wellbeing."	Validated measurements - LGA	We were part of the Dementia and Imagination research project (the only delivery partner in Wales) Evaluation findings can be found at www.dementiaandimagination.org.uk	N/A	N/A	COMPLETED: Participants are sharing images of the work they are creating at home with us, which we are posting on twitter and on our website virtual gallery.	https://www.culturehealthandwellbeing.org.uk/sites/default/files/2020-07/Case%20study%20-%20Denbighshire%20Leisure%20Ltd.pdf	CHWA - https://www.culturehealthandwellbeing.org.uk/how-creativity-and-culture-are-supporting-shielding-and-vulnerable-people-home-during-covid-19	R47	PHE > 10
Devon Recovery Learning Community	Grey Literature (case study within wider report)	Public Service Project	Psychological	Mental Health	Adults with mental health issues	Adults with addiction	1944	Creative/Art	Online	In your own time	In your own time	Since 2013	No	Art classes, links and resources, activities and craft, including puzzles, jigsaws, mindful colouring and other printables.	NHS	Free for participants; Unknown	Devon	South West England	0	"Our outcomes are to promote mental health and wellbeing through a recovery learning approach based on an educational model to instil hope, opportunity and control. We believe that through education people can learn how to take care of themselves, and others more effectively."	Anecdotal/ feedback/ participant numbers	We have 1944 students currently registered as students on our website	Challenges and successes	"There are of course many challenges. Tutors have had to develop new ways of working and students have had to develop new ways of learning. Not everyone has reliable access to the internet; some people have no access to the internet or for whatever reason choose not to; video-conferencing can sometimes be patchy.	COMPLETED: Open access courses;	www.devonrlc.co.uk	CHWA - https://www.culturehealthandwellbeing.org.uk/how-creativity-and-culture-are-supporting-shielding-and-vulnerable-people-home-during-covid-19	R48	PHE > 10
Fun palaces Scotland	Grey Literature (case study within wider report)	Charity project	Psychological	Mental Health	Adults with mental health issues	People with mental health issues	1000	Creative/Art	Online	Unclear	Unclear	Since May 2020	No	Tiny Revolutions of Connection: Arts and crafts for patients in hospital and vulnerable and shielding individuals	National Lottery Community Fund	Free for participants; Unknown	Scotland	Scotland	0	"Improved health and wellbeing; better faster recovery."	Challenges and successes	"So far I have heard from the NHS Highland Mental Health Service Manager for Occupational Therapy that the project has been more than just welcome; it has been essential. It has filled a gap – a need – during the COVID crisis. The activities provided have been especially valued as they can also be taken home by patients after their hospital stay, so that staff know they have therapeutic activity …	N/A	N/A	COMPLETED: Therapeutic outputs (recovery being aided via this intervention), possibly resulting in an exhibition or Fun Palace event to celebrate and showcase the work of patients, clients and staff	https://funpalaces.co.uk	CHWA - https://www.culturehealthandwellbeing.org.uk/how-creativity-and-culture-are-supporting-shielding-and-vulnerable-people-home-during-covid-19	R49	PHE > 10
Garden Museum	Grey Literature (case study within wider report)	Cultural Asset Case Study	Physical	Dementia	People with Dementia	N/A	18	Creative/Art	Online	Unclear	Monthly	Unclear	Yes - Artist led	Clay for Dementia: 8 week pottery course	Independent charity	Free for participants; Unknown	London	Greater London	0	"To keep the sessions running as planned even through lockdown; To keep everyone in touch with each other; To provide something for people to look forward to; To provide some sense of normality. To make a link with the museum and the participants."	Questionnaire (unnamed)	‘What are your favourite things about the session?’, Being Creative; Having a chat; Doing a regular weekly activity; clay; and A break from the daily routine, were all cited as equally important.	Feedback	Feedback: ‘What I’ve been wanting to say is how very much I appreciate your organizing Clay for Dementia during this lockdown period. It’s been a godsend for both of us. H looks forward to Thursday – he loves doing the clay and enjoys seeing everyone on screen too. We keep the finished products in a carton under the sofa (for lack of anywhere else!) and he gets it out regularly to see what he’s m…	COMPLETED: Display of ceramics work	https://gardenmuseum.org.uk/events/clay-for-dementia-2020/	CHWA - https://www.culturehealthandwellbeing.org.uk/how-creativity-and-culture-are-supporting-shielding-and-vulnerable-people-home-during-covid-19	R50	PHE > 10
Inclusive intergenerational dance	Grey Literature (case study within wider report)	Charity project	Physical	Dementia	People with Dementia	Older	300 target (100 currently)	Creative/Art	Online	Unclear	Weekly	Since July 2020	No	Behind Closed Doors, Smile Inside, and Tackling Inequalities: working with isolated older people 2:1 in their own homes with the aim of engaging them in discussing to create movement and prose based on museum objects	National Lottery Community Fund, Green Square Community Housing, Corsham Health and Wellbeing Board.	Free for participants; Unknown	South East and South West England	South East and South West England	0	"Lowering feelings of isolation; Lowering feelings of loneliness Empowering people to make their own choices Engaging people in skills development and creative exploration; Support physical health; Increase participation in physical activity; Support mental health and wellbeing; Support people to feel they are living their ‘best life’; Develop connections between individual people, between people…	Feedback	Feedback: Smile Inside: We have had a fantastic response and the project has been a joy to deliver. The artists have gone way beyond their small fee to create some beautiful pieces and the community are now starting to get involved. St Lawrence Primary school’s Key worker group became incredibly invested in the project and have written about what inspired them and also created a film talking abou…	Challenges and Successes	Participants shared that they really missed us and their group, the activity and the company, they didn’t want to talk to us on the phone they wanted to see us which resulted in a number of trips to talk through open windows and doors. • For a few they felt overwhelmed by the number of phone calls from friends and family and didn’t want to be on the phone any more. • For some they found it really…	COMPLETED: Behind Closed doors (Delayed due to covid but looking for ways to start): • 2 artists to visit identified older adults in their homes taking tea and cake and museum objects. Exploring dance, storytelling and prose. • Run weekly Creative Lunch sessions including seated creative dance and craft at The Pound for older people, people with dementia and their carers. • Run weekly Studio 64 s…	www.iid.org.uk/smile-inside	CHWA - https://www.culturehealthandwellbeing.org.uk/how-creativity-and-culture-are-supporting-shielding-and-vulnerable-people-home-during-covid-19	R51	PHE > 10
Manchester Museum	Grey Literature (case study within wider report)	Local Authority Museum case study	Psychological	Mothers with anxiety/ postnatal depression	Mothers	N/A	200 (1000 views online0	Music	Online	1 hour	Weekly	Since May 2019	Yes - therapist led	Muso Baby: Museum based therapeutic interventions for for mothers experiencing or at risk of anxiety or post-natal depression and their babies, who might not normally access this kind of support or visit a museum.	Manchester Museum	Free for participants; Unknown	Manchester	North West England	0	"As Muso Baby is run by a trained music therapist, there are clear therapeutic and social out comes for the sessions – both face to face and online. Themes such as combating stigma , isolation, improving emotional health, bond with babies, attunement resilience, change in long term behaviours and development are all part of the Muso Baby ethos."	Feedback	“My daughter is five and adopted and she LOVES the sessions! We are working through her attachment issues. Online works because she doesn't feel self-conscious about being older than everyone else. She regresses a bit in the sessions and just enjoys being my baby. So, thank you - it is the highlight of our week.”	N/A	N/A	INTENDED: We work with those living with dementia to co-create a monthly podcast – London Lives. We are also collating memories around objects to populate a new London Lives webpage. Our paper activity packs encourage people living with dementia to share	https://ihv.org.uk/news-and-views/voices/muso-baby-using-cultural-places-as-pioneering- spaces-to-support-parent-and-infant-relationships/	CHWA - https://www.culturehealthandwellbeing.org.uk/how-creativity-and-culture-are-supporting-shielding-and-vulnerable-people-home-during-covid-19	R52	PHE > 10
Museum of Oxford	Grey Literature (case study within wider report)	University museum programme case study	Socioeconomic	Older	Older adults	N/A	200	Creative/Art	Posted	In your own time	In your own time	Since May 2020	No	Reminiscence based hobbies and crafts delivered, newsletter	Museum of Oxford	Free for participants; Unknown	Oxford	Midlands	0	"The key outcome was to help older people, particularly those without practical access to the internet, feel a sense of connection and belonging. This was partly to be achieved by having a postcard to keep, send on, leave outside the door or give to a neighbour. The newsletters were light touch with ideas for activities."	Feedback	Feedback: We deliberately did not incorporate any evaluative tools into the programme beyond what organically came back to us either via postcards, feedback to delivery drivers. This pilot was about providing local people with something, without agenda. Verbal feedback was positive where received.	Challenges and successes	Successes: to be able to respond to a crisis in a very short space of time and be prepared to create something without requiring any specific outcomes but simply responding to clear need on the ground. • collaboration with the community hub team and council teams to distribute the newsletters; • building practical and active relationships with other teams Challenges • accepting that logistically …	COMPLETED: newsletter; postcard; reminiscence materials	https://www.culturehealthandwellbeing.org.uk/sites/default/files/2020-07/Case%20study%20-%20Museum%20of%20Oxford.pdf	CHWA - https://www.culturehealthandwellbeing.org.uk/how-creativity-and-culture-are-supporting-shielding-and-vulnerable-people-home-during-covid-19	R53	PHE > 10
National Museums liverpool (a)	Grey Literature (case study within wider report)	Local Authority Museum case study	Socioeconomic	Older	Older adults	N/A	395	Creative/Art	Online	In your own time	Monthly	ongoing' - unclear since when	No	Happy Older People: The HOP website is a hub for age-friendly arts and cultural activity	National Museums Liverpool; Art Council England ; The Baring Foundation – Celebrating Age Fund; Liverpool City Council	Free for participants; Unknown	Liverpool	NW England	0	"There are activities and online events shared in the newsletter which will support older people to remain physically healthy during lockdown – including online exercise classes and dance tutorials."	Participant count	Newsletter open rate of 44.3% (compared to industry average of 20.7%), and a click-through rate of 13.3% (compared to industry average of 2.1%).	Challenges and successes	Challenges: barriers to participation for isolated and hard to reach; digital poverty and older people not online; many workers on furlough	COMPLETED: Up to date website	www.happyolderpeople.com	CHWA - https://www.culturehealthandwellbeing.org.uk/how-creativity-and-culture-are-supporting-shielding-and-vulnerable-people-home-during-covid-19	R54	PHE > 10
National Museums liverpool (b)	Grey Literature (case study within wider report)	Local Authority Museum case study	Socioeconomic	BAME	BAME	N/A	1000	Creative/Art	Online	In your own time	In your own time	Since January 2020	Yes - historian led	Slavery Remembrance Day: We aspired to achieve deeper, and more collaborative community participation	National Museums Liverpool; Liverpool City Council	Free for participants; Unknown	Liverpool	NW England	0	"Combatting isolation • Combatting inequalities highlighted through Covid 19 risk for communities of diverse BME heritage. • Personal experiences of healing and empowerment • Greater trust between communities and NML • Shared ownership and interpretation of Black history and traumatic histories.	Feedback	There is feedback from the community conversations which took place before the pandemic and lockdown. These findings highlight the importance of greater transparency and an equal balance of power between community stakeholders and the museum itself. These themes were even more importance once the pandemic took hold, and the racist murder of George Floyd, with the themes of ongoing racial inequali…	N/A	N/A	COMPLETED: Engagement with schools; trying out different ideas; online lectures and Q&A	https://www.liverpoolmuseums.org.uk/slavery-remembrance-day	CHWA - https://www.culturehealthandwellbeing.org.uk/how-creativity-and-culture-are-supporting-shielding-and-vulnerable-people-home-during-covid-19	R55	PHE > 10
South London Gallery	Grey Literature (case study within wider report)	Local Authority Museum case study	Psychological	Parents with Mental Health Issues	Parents	People with mental health issues	21 families	Creative/Art	Online, posted	In your own time	In your own time	Since 2012	No	Supersmashers snd creative families: art and play project for up to 200 looked-after children aged 6-12 living in Southwark.	BBC Children in Need; Parental Mental Health team	Free for participants; Unknown	Greater London	Greater London	0	"feel more positive to engage in playful activities • have increased confidence in their creative abilities, a greater sense of “being good at” something. It is hoped that this will lead to the longer term impact of increasing the children’s self-esteem. • increased social skills.	Feedback	Feedback: Supersmashers: Encouraged whole foster families to make and play together • Kept children occupied and engaged in creative making • An exciting ‘event’ in the children’s week when parcels arrived Creative Families: The packs have only just been delivered, so we are waiting to hear feedback from families.	N/A	N/A	COMPLETED: - Children are encouraged to make, create and play with the materials in their packs. -Whole foster families are encouraged to work together both in response to ‘blended’ instructional packs and to more freely-chosen play prompts and ideas. (physical materials and tools as well as online videos) -There are no plans to exhibit their work at this time.	https://www.southlondongallery.org/projects/supersmashers/	CHWA - https://www.culturehealthandwellbeing.org.uk/how-creativity-and-culture-are-supporting-shielding-and-vulnerable-people-home-during-covid-19	R56	PHE > 10
Suffolk Artlink	Grey Literature (case study within wider report)	Charity project	Psychological	Learning Difficulties / Autism	People with Autism/ Autistic people	People with learning difficulties	Unclear	Creative/Art	Online, posted	In your own time	Weekly challenge	Unclear	Yes - artist led	Brave Art: is an arts training course for people with learning disabilities offering students the chance to enjoy exploring a variety of art forms whilst supporting their wellbeing and developing creative and life skills.	Unclear	Free for participants; Unknown	East England	East England	0	"Brave Art is an arts training course for people with learning disabilities offering students the chance to enjoy exploring a variety of art forms whilst supporting their wellbeing and developing creative and life skills."	No evaluation	The Brave Art Gallery – shares the work produced by students	N/A	N/A	COMPLETED: gallery	https://www.culturehealthandwellbeing.org.uk/how-creativity-and-culture-are-supporting-shielding-and-vulnerable-people-home-during-covid-19	CHWA - https://www.culturehealthandwellbeing.org.uk/how-creativity-and-culture-are-supporting-shielding-and-vulnerable-people-home-during-covid-19	R57	PHE > 10
University of Cambridge Museums (a)	Grey Literature (case study within wider report)	University museum programme case study	Physical	Caregivers of terminally ill children	Families of children with illness	N/A	786 families	Creative/Art	Online, posted	In your own time	Monthly challenge	Since 2013	No	EACH: The Fitzwilliam Museum and EACH collaboration is aimed at young children with progressive life-limiting illnesses and their families to have fun together as a family	Arts Council England	Free for participants; Unknown	Cambridgeshire	East England	0	"We are working with the EACH art therapist at the Milton Hospice to provide stimulating, targeted, creative activities, aimed at encouraging family wellbeing "	Feedback	Feedback: “I received the activity pack today — and it is lovely 🙂 You have chosen the pictures so well — I remember all the children being fascinated with the horse in armour at the workshops.” Child and Family Worker from the local Child & Family Hub	N/A	N/A	COMPLETED: Online activities, community activity packs, training for Museum staff to best prepare for when it is safe for EACH families to come back to the Museum.	https://www.museums.cam.ac.uk/blog/2017/09/04/east-anglias-childrens-hospices-at-the- fitzwilliam/	CHWA - https://www.culturehealthandwellbeing.org.uk/how-creativity-and-culture-are-supporting-shielding-and-vulnerable-people-home-during-covid-19	R58	PHE > 10
University of Cambridge Museums (b)	Grey Literature (case study within wider report)	University museum programme case study	Psychological	Cognitive impairment including dementia	People with Dementia	People with cognitive impairmant	28	Creative/Art	Online	1.5 hours	Monthly	Since 2010	No	Portals to the World: museum programme designed for people to learn, share and create together.	Arts Council England	Free for participants; Unknown	Cambridgeshire	East England	0	"Foster connectivity, relationships and belonging, combatting loneliness and isolation. Inspire curiosity, engagement and creativity, combatting diminishing sense of identity Help build resilience and agency, combatting loss of societal, familial / environmental disablement."	Feedback	"At this very early stage we are collecting feedback rather than evaluation, to help shape the programme delivery."	N/A	N/A	COMPLETED: Monthly workshops: 1.5 hours, attended by 20+ participants. Content, live talk from a subject specialist, Q&A and discussion. Follow on art activity, materials send by post, guidance created and available via video.	https://www.culturehealthandwellbeing.org.uk/sites/default/files/2020-07/Case%20study%20-%20University%20of%20Cambridge%20Museums%20-%20Portals%20to%20the%20World.pdf	CHWA - https://www.culturehealthandwellbeing.org.uk/how-creativity-and-culture-are-supporting-shielding-and-vulnerable-people-home-during-covid-19	R59	PHE > 10
University of Cambridge Museums (c)	Grey Literature (case study within wider report)	University museum programme case study	Socioeconomic	Community/ Isolated	Older adults	People who are isolated/ housebound	320	Music	Online, over phone, posted	Unclear	Weekly	Since 2017	Yes - artist led	Dance and Time with the Museum: collaboration with dance artist Filipa Pereira - Stubbs for older isolated people.	National Lottery Community Fund; Cambridge City Council; Arts Council England	Free for participants; Unknown	Cambridgeshire	East England	0	"Contribute to the psychosocial wellbeing of older people living in Cambridgeshire particularly those likely to be affected by loneliness and social isolation; To shift perceptions of the Museum –to enable participants to see it as a place for everyone as co-creators of a social and cultural community."	Working on validated	Working with Anglia Ruskin university on independent evaluation	Feedback	Feedback: "I’m struggling now; I’m having a really tough time. It’s been good to escape into this painting (where) we’d go together to the bottom of the hills and slowly climb to the top and it would be fresh air, freedom."	COMPLETED: Phone calls; zoom calls; art fil,s' postcards/posters' art packs	https://www.culturehealthandwellbeing.org.uk/sites/default/files/2020-07/Case%20study%20-%20University%20of%20Cambridge%20Museums%20-%20Time%20%26%20Dance.pdf	CHWA - https://www.culturehealthandwellbeing.org.uk/how-creativity-and-culture-are-supporting-shielding-and-vulnerable-people-home-during-covid-19	R60	PHE > 10
Arts Council (a)	Public Domain	Resource	Socioeconomic	Digital poverty	Low skilled workers	N/A	N/A	Training	Online	N/A	N/A	Since March 2020	Yes - professional led	An online toolkit designed to help organisations develop their digital offer during Covid; allow them to learn best practice and use the self-assessment tool to identify strengths and weaknesses.	Arts Council England	Membership fee waived (unknown)	Online	Online	0	"This free online toolkit can help your organisation use digital technology more effectively. Brush up on best practice and use the self-assessment tool to identify your strengths and weaknesses.	Sector report	Public Domain resource - no evaluation or evaluation unknown	N/A	N/A	N/A	Hand searching	https://www.artscouncil.org.uk/developing-creativity-and-culture/developing-digital-culture	R61	PHE<10
Arts Council (b)	Public Domain	Resource	Socioeconomic	Low income, financial hardship	People working with cultural organisations	N/A	N/A	Training	Online	N/A	N/A	Since March 2020	Yes - professional led	Recovery grants and loans resources for organisations; help in recovery during Covid; building sustainable business models for organisations	Arts Council	£70 per year + VAT	Online	Online	0	To offer a repository of organisations that can support businesses	Sector report	Public Domain resource - no evaluation or evaluation unknown	N/A	N/A	N/A	Hand searching	https://www.artscouncil.org.uk	R62	PHE<10
Arts Marketing Association	Public Domain	Resource	Socioeconomic	Employment	Low income artists	N/A	N/A	Training	Online	N/A	N/A	Since April 2020	Yes - professional led	Networking and membership organisation for arts professionals to reach more audiences	N/A	N/A	N/A	Online	0	To offer networking and resources to arts organisations	No evaluation	Public Domain resource - no evaluation or evaluation unknown	N/A	N/A	N/A	Hand searching	https://www.a-m-a.co.uk	R63	PHE<10
Lewisham Speak Up	Public Domain	Resource	Psychological	Learning Difficulties	People with Learning Difficulties	N/A	N/A	Outreach - vulnerable	Online, face to face	1 hour	Weekly	Since March 2020	No	Online accessible resources for people with learning difficulties; information about Covid and where to go for help - adults with learning disabilities in Lewisham (covid support strategy)	N/A	N/A	London, SE, SW, NE	National	0	To offer resources for people with LD to help them through Covid	Unclear from website	Public Domain resource - no evaluation or evaluation unknown	N/A	N/A	N/A	Hand searching	https://www.lsup.org.uk/pdf/CoronavirusServicesLeafletOct2020.pdf	R64	PHE > 10
Choice Support	Public Domain	Charity resources	Psychological	Learning Difficulties	People with Learning Difficulties	N/A	N/A	Outreach - vulnerable	Online	N/A	N/A	N/A	No	At home support for people with learning disabilities and Covid related resources	Choice Support	N/A	N/A	Online	0	To offer resources to people with LD	Unclear from website	Public Domain resource - no evaluation or evaluation unknown	N/A	N/A	N/A	Hand searching	https://www.choicesupport.org.uk/about-us/blog/wheres-the-manual-for-deadly-covid-19	R65	PHE<10
McIntyre	Public Domain	Charity project	Psychological	Learning Difficulties	People with Learning Difficulties	N/A	N/A	Outreach - vulnerable	Online	N/A	N/A	Since March 2020	No	Lockdown diaries - written by people using the charity to show how they have been spending locdown	McIntyre	N/A	N/A	Online	0	To offer online support to people with LD	Anecdotal/ qualitative	Public Domain resource - no evaluation or evaluation unknown	N/A	N/A	N/A	Hand searching	https://www.macintyrecharity.org/lockdown-diaries/	R66	PHE<10
Vibrance	Public Domain	Charity project	Psychological	Learning Difficulties	People on Low Income	Carers	N/A	Outreach - vulnerable	Online, face to face	N/A	N/A	N/A	N/A	Adults with learning disability; respite, rehousing, budgeting support during Covid Social care and support/ Covid	Vibrance	N/A	N/A	Online	0	To offer respite, rehousing, budgeting support to adults with LD	Report	Public Domain resource - no evaluation or evaluation unknown	N/A	N/A	N/A	Hand searching	https://www.vibrance.org.uk	R67	PHE<10
Age UK	Public Domain	Charity project	Psychological	Older	Older	N/A	N/A	Outreach - vulnerable	Online	N/A	N/A	N/A	N/A	COVID resources (shopping, test and trace, health services, lockdown restrictions, etc)	Age UK	N/A	N/A	Online	0	To offer online support for elderly	No evaluation	Public Domain resource - no evaluation or evaluation unknown	N/A	N/A	N/A	Hand searching	https://www.ageuk.org.uk/information-advice/coronavirus/coronavirus-guidance/	R68	PHE<10
Inclusion North	Public Domain	Charity project	Psychological	Learning Difficulties	People with Learning Difficulties	N/A	N/A	Outreach - vulnerable	Online	N/A	N/A	N/A	N/A	COVID Resources and online outreach - adults with LD/ASD covid factsheet	Inclusion North	N/A	N/A	North East England	0	To offer support for people with LD	No evaluation	Public Domain resource - no evaluation or evaluation unknown	N/A	N/A	N/A	Hand searching	https://inclusionnorth.org/wp-content/uploads/2020/02/coronavirus-update-23.3.2020.pdf	R69	PHE<10
Performance medicine	Public Domain	Charity project	Psychological	Healthcare professionals	Healthcare professionals	N/A	N/A	Music, art	Online	1.5 hour	Weekly	Since March 2020	Yes - professional led	Performance medicine - movements for lockdown workshops and classes for medical professionals	Performance medicine	N/A	N/A	Online	Control groups used previously but Covid related interventions unclear	To provide access to arts and music activities for healthcare professionals	Validated measurements, BMJ best practice, the Lancet previously - however Covid related interventions not yet known	N/A	N/A	N/A	N/A	Hand searching	https://performingmedicine.com/blog/recovery-room/	R70	Cochrane - Silver
Alzheimer's UK	Public Domain	Charity project	Physical	Dementia	People with Dementia	N/A	N/A	Outreach - vulnerable	Online	N/A	N/A	N/A	N/A	Dementia and carers - resources for Covid - COVID Resources and online outreach	Alzheimer's UK	N/A	N/A	Online	0	To provide resources to people with dementia and their carers	No evaluation	Public Domain resource - no evaluation or evaluation unknown	N/A	N/A	N/A	Hand searching	https://www.alzheimers.org.uk	R71	PHE<10
Mind	Public Domain	Charity project	Psychological	Mental Health	Adults with mental health issues	N/A	N/A	Outreach - vulnerable	Online	N/A	N/A	N/A	N/A	People with mental health issues and carers - COVID Resources and online outreach	Mind	N/A	N/A	Online	0	To provide resources to people with MH and their carers	No evaluation	Public Domain resource - no evaluation or evaluation unknown	N/A	N/A	N/A	Hand searching	https://www.mind.org.uk/information-support/coronavirus/coronavirus-and-your-wellbeing/	R72	PHE<10
Rehab4Addiction	Public Domain	Charity project	Psychological	Addiction	People with addiction	N/A	N/A	Outreach - vulnerable	Online	N/A	N/A	N/A	N/A	COVID Resources and online outreach	Rehab4Addiction	N/A	N/A	Online	0	To provide resources to people with addiction and their carers	No evaluation	Public Domain resource - no evaluation or evaluation unknown	N/A	N/A	N/A	Hand searching	https://www.rehab4addiction.co.uk/coronavirus/mental-health-coronavirus	R73	PHE<10
Clinks	Public Domain	Charity project	Socioeconomic	Prison Staff	Prison Staff	N/A	N/A	Resources for professionals working with vulnerable	Online	N/A	N/A	N/A	N/A	Criminal justice system covid preparedness - COVID resources for staff - action that should be taken to prepare for the pandemic; changes to prison regimes and services affecing staff, volunteers and beneficiaries	Clinks	N/A	N/A	Online	0	To provide resources to professionals working within prisons	No evaluation	Public Domain resource - no evaluation or evaluation unknown	N/A	N/A	N/A	Hand searching	https://www.clinks.org/community/blog-posts/covid-19-prison-preparedness-what-does-mean-voluntary-organisations	R74	PHE<10
Heart n soul	Public Domain	Charity project	Psychological	Learning Difficulties / Autism	People with Learning Difficulties	People with Autism/ Autistic people	N/A	Creative/Art	Online	Several every week	Several every week	Unclear	Yes - artist led	Online art classes/ meetings/ other online gatherings for people with LD	Heart n soul	N/A	N/A	Online	0	"We believe in the power and talents of people with learning disabilities, providing opportunities for people to discover, develop and share this power and talent as widely as possible. We also have a lot of fun! "	No evaluation	Public Domain resource - no evaluation or evaluation unknown	N/A	N/A	N/A	Hand searching	https://www.heartnsoul.co.uk/stayhome	R75	PHE<10
Unlimited	Public Domain	Charity project	Physical	Disabled Artists	Disabled Artists	N/A	N/A	Outreach - artists	Online	N/A	N/A	N/A	N/A	Contingency plans for disabled artists - Micro commissions and planning	Unlimited	N/A	N/A	Online	0	To provide an outline of changes in working style/ ways in which outreach to vulnerable workers	No evaluation	Public Domain resource - no evaluation or evaluation unknown	N/A	N/A	N/A	Hand searching	https://weareunlimited.org.uk/contingencies-for-coronavirus/	R76	PHE<10
A+H Hub	Public Domain	Charity project	Socioeconomic	Low income, financial hardship	Artists working in Arts and Health	Low income artists	N/A	Outreach - artists	Online	Several every week	Several every week	Unclear	Yes - artist led	Arts and Health Hub: Online space for collaboration during Covid - ideas for collaboration and networking platforms e.g. Slack and an inbuilt platform	A+H Hub	N/A	N/A	Online	0	"to provide a place to connect with other artists, share works and challenges, discover resources, or just check-in with others in the sector. We use Slack, a team communication tool. It’s free to join.	No evaluation	Public Domain resource - no evaluation or evaluation unknown	N/A	N/A	N/A	Hand searching	https://artsandhealthhub.org/lets-connect-more-introducing-our-slack-space/	R77	PHE<10
Money Advice Service	Public Domain	Charity resources	Socioeconomic	Low income, financial hardship	People on a Low income	People with mental health issues due to money worries	N/A	Resource	Online	N/A	N/A	N/A	N/A	COVID financial planning resources; benefits, employment advice, keeping up with payments, money and mental health	N/A	N/A	N/A	Online	0	To provide a guide to managing money and a resource to let people know what services are available out there	No evaluation	Public Domain resource - no evaluation or evaluation unknown	N/A	N/A	N/A	Hand searching	https://www.moneyadviceservice.org.uk/en/articles/coronavirus-what-it-means-for-you#if-youre-self-employed-or-a-sole-trader	R78	PHE<10
Independent Arts Projects	Public Domain	Charity resources	Socioeconomic	Low income, financial hardship	Low income artists	N/A	N/A	Outreach - artists	Online	N/A	N/A	N/A	Last updated August 2020	COVID-19 Links to advice and support for artists; resources; benefits; hardship funds etc.	N/A	N/A	N/A	Online	0	"Signposting benefits, statements, support for arts workers following the COVID-19 outbreak. "	No evaluation	Public Domain resource - no evaluation or evaluation unknown	N/A	N/A	N/A	Hand searching	http://www.independentartsprojects.com/covid-19-impact-on-arts-workers/	R79	PHE<10
Museum Freelance	Public Domain	Charity resources	Socioeconomic	Low income, financial hardship	Low income artists	N/A	N/A	Outreach - artists	Online	N/A	N/A	N/A	N/A	Contingency planning for the creative industries - COVID resources - dealing with the pandemic as a freelancer	N/A	N/A	N/A	Online	0	"Freelancers and small businesses everywhere are in the middle of contingency planning. We’ve decided to create a reference list of useful articles or resources that we spot across the freelance community below."	No evaluation	Public Domain resource - no evaluation or evaluation unknown	N/A	N/A	N/A	Hand searching	https://www.museumfreelance.org/news-and-views/2020/3/13/dealing-with-covid-19-outbreak-as-a-freelancer	R80	PHE<10
Money Saving Expert	Public Domain	Resource	Socioeconomic	Low income, financial hardship	People on a Low Income	N/A	N/A	Resource	Online	N/A	N/A	N/A	N/A	Financial help and guidance for COVID: Coronavirus Finance & Bills Help; Help if you're struggling to pay mortgages & other debts, plus rental help, council tax & more	N/A	N/A	N/A	Online	0	"Help if you're struggling to pay mortgages & other debts, plus rental help, council tax & more"	No evaluation	Public Domain resource - no evaluation or evaluation unknown	N/A	N/A	N/A	Hand searching	https://www.moneysavingexpert.com/news/2020/03/uk-coronavirus-help-and-your-rights/	R81	PHE<10
UK Covid-19 Freelance Artist Resources List	Public Domain	Resource	Socioeconomic	Low income, financial hardship	Low income artists	Low income artists with mental health worries	N/A	Resource	Online	N/A	N/A	N/A	Last updated April 2020	Collection of links to resources to help freelance creatives and artists during the current Coronavirus COVID-19 pandemic: Financial help and guidance for COVID	N/A	N/A	N/A	Online	0	To provide financial help and guidance for COVID	No evaluation	Public Domain resource - no evaluation or evaluation unknown	N/A	N/A	N/A	Hand searching	https://ukcovid19freelanceartistresource.wordpress.com	R82	PHE<10
UCL Factsheet	Public Domain	Resource	Socioeconomic	Mental Health	People with mental health issues	N/A	N/A	Resource	Online	N/A	N/A	N/A	N/A	How to address mental health in the workplace; prevalence of mental health problems; supoprting employees	N/A	N/A	N/A	Online	0	Factsheet on how to address mental health in the workplace	No evaluation	Public Domain resource - no evaluation or evaluation unknown	N/A	N/A	N/A	Hand searching	https://onlinelearning.ucl.ac.uk/resources/managing-workplace-stress-anxiety/	R83	PHE<10
NESTA	Public Domain	Resource	Socioeconomic	Low income, financial hardship	Small business owners	N/A	N/A	Resource	Online	N/A	N/A	N/A	N/A	Resources on funding, volunteering, advice on small business loans and crisis management	Nesta	N/A	N/A	Online	0	curated list of resources, from funding and volunteer opportunities to ways to share your data to help fight the spread of COVID-19.	No evaluation	Public Domain resource - no evaluation or evaluation unknown	N/A	N/A	N/A	Hand searching	https://www.nesta.org.uk/feature/unprecedented-times/	R84	PHE<10
NCVO	Public Domain	Resource	Socioeconomic	Charity owners	Charity workers	N/A	N/A	Resource	Online	N/A	N/A	N/A	N/A	Coronavirus Governance: what charities and trustees need to think about - Support and guidance for charities	N/A	N/A	N/A	Online	0	To provide a resource for charity owners and senior charity workers about forward planning and enabling charities to survive the pandemic	No evaluation	Public Domain resource - no evaluation or evaluation unknown	N/A	N/A	N/A	Hand searching	https://blogs.ncvo.org.uk/2020/03/17/coronavirus-and-governance-what-charity-trustees-need-to-think-about/	R85	PHE<10
Arts Professionals Magazine	Public Domain	Resource	All	Arts professionals	Arts professionals	N/A	N/A	Resource	Online	N/A	N/A	N/A	N/A	A microsite for Covid updates for arts professionals	N/A	N/A	N/A	Online	0	To provide regular updates on projects and resources to support wellbeing, careers and creativity in the arts	No evaluation	Public Domain resource - no evaluation or evaluation unknown	N/A	N/A	N/A	Hand searching	https://www.artsprofessional.co.uk/magazine/article/stay-well-supported-and-creative-our-new-microsite-covid-19-updates?fbclid=IwAR3Lc2KRSX9ks_4cefTem5E-LODfgcMlkJLRNTHTGvHxk0DHK3ShX5WjOn8	R86	PHE<10
Making Music	Public Domain	Resource	All	Musicians	Musicians	N/A	N/A	Outreach - artists	Online	N/A	N/A	N/A	N/A	Coronavirus: information and future planning for music groups: Resources for musicians who need to change their offer due to Covid	N/A	N/A	N/A	Online	0	"we explore matters to consider for your music group."	No evaluation	Public Domain resource - no evaluation or evaluation unknown	N/A	N/A	N/A	Hand searching	https://www.makingmusic.org.uk/news/coronavirus-music-groups	R87	PHE<10
Tutti Space General resources	Public Domain	Resource	Socioeconomic	Low income, financial hardship	Freelancers	N/A	N/A	Outreach - artists	Online	N/A	N/A	N/A	Last updated November 2020	Creative resources; live stream; teaching online; transferable skills; Freelancing online; Online support groups	N/A	N/A	N/A	Online	0	Back in March 2020 we compiled a list of free resources for freelancers struggling in the UK because of COVID-19 and its widespread affects. Very few of them were created by us - we simply found them online and thought they might be useful to our community, so compiled them here.	No evaluation	Public Domain resource - no evaluation or evaluation unknown	N/A	N/A	N/A	Hand searching	https://www.tutti.space/free-resources#regularly-updated-resources	R88	PHE<10
Mutual Aid - Bringing together the community	Public Domain	Resource	Socioeconomic	Community/ Isolated	Everyone in the community	People who are isolated/ housebound	N/A	Creative/Art	Online	N/A	N/A	N/A	N/A	Activities to bring the community together during lockdown	N/A	N/A	N/A	Online	0	How can we creatively connect with our audiences, our neighbours and new groups during a time of social isolation?	No evaluation	Public Domain resource - no evaluation or evaluation unknown	N/A	N/A	N/A	Hand searching	https://docs.google.com/document/d/1fiMx4BWWQ-stUAPVO4pwqU6iQhhbIqzgLx7cB6E1FrY/edit	R89	PHE<10
Mutual aid - Community noticeboard	Public Domain	Example of activity	Socioeconomic	Community/ Isolated	Everyone in the community	People who are isolated/ housebound	N/A	Creative/Art	Online	N/A	N/A	N/A	No - Informal, community led	Commmunity notice board	N/A	N/A	N/A	Online	0	Community cohesion during lockdown	No evaluation	Public Domain resource - no evaluation or evaluation unknown	N/A	N/A	N/A	Hand searching	https://medium.com/street-space/together-apart-connecting-community-in-social-distancing-spaces-fc880980994c	R90	PHE<10
Mutual aid - Social distanced neighbourhood scavenger hunt	Public Domain	Example of activity	Socioeconomic	Community/ Isolated	Everyone in the community	People who are isolated/ housebound	N/A	Creative/Art	Online	N/A	N/A	N/A	No - Informal, community led	Social distanced neighbourhood scavenger hunt	N/A	N/A	N/A	Online	0	Community cohesion during lockdown	No evaluation	Public Domain resource - no evaluation or evaluation unknown	N/A	N/A	N/A	Hand searching	https://flipboard.com/article/host-a-social-distancing-neighborhood-scavenger-hunt/a-_-KmkY-GRdWLjw3Mls4J4w%3Aa%3A1040439457-212056d146%2Flifehacker.com	R91	PHE<10
Mutual aid - Group exercise	Public Domain	Example of activity	Socioeconomic	Community/ Isolated	Everyone in the community	People who are isolated/ housebound	N/A	Creative/Art	Online	N/A	Once a week	N/A	No - Informal, community led	Regular group exercise	N/A	N/A	N/A	Online	0	Community cohesion during lockdown	No evaluation	Public Domain resource - no evaluation or evaluation unknown	N/A	N/A	N/A	Hand searching	https://www.walesonline.co.uk/news/wales-news/entire-street-take-part-daily-18084607	R92	PHE<10
Mutual aid - Balcony art curated by gallery	Public Domain	Example of activity	Socioeconomic	Community/ Isolated	Everyone in the community	People who are isolated/ housebound	N/A	Creative/Art	Online	N/A	N/A	N/A	No - Informal, community led	Balcony art curated by gallery	N/A	N/A	N/A	Online	0	Community cohesion during lockdown	No evaluation	Public Domain resource - no evaluation or evaluation unknown	N/A	N/A	N/A	Hand searching	https://www.theartnewspaper.com/news/museum-group-commissions-artists-to-make-balcony-art-during-coronavirus-crisis	R93	PHE<10
Mutual aid - Foraging during lockdown	Public Domain	Example of activity	Socioeconomic	Community/ Isolated	Everyone in the community	People who are isolated/ housebound	N/A	Nature	Online	N/A	N/A	N/A	No - Informal, community led	Foraging during lockdown	N/A	N/A	N/A	Online	0	Community cohesion during lockdown	No evaluation	Public Domain resource - no evaluation or evaluation unknown	N/A	N/A	N/A	Hand searching	https://gallowaywildfoods.com/foraging-during-the-corona-virus-pandemic/	R94	PHE<10
Mutual aid - Neighbourhood singalong	Public Domain	Example of activity	Socioeconomic	Community/ Isolated	Everyone in the community	People who are isolated/ housebound	N/A	Music	Online	N/A	Once a week	N/A	No - Informal, community led	Neighbourhood singalong	N/A	N/A	N/A	Online	0	Community cohesion during lockdown	No evaluation	Public Domain resource - no evaluation or evaluation unknown	N/A	N/A	N/A	Hand searching	https://www.itv.com/news/2020-03-14/my-street-came-alive-rome-sings-anthem-from-balconies-during-lockdown	R95	PHE<10
Mutual aid - Community food larder	Public Domain	Example of activity	Socioeconomic	Community/ Isolated	Everyone in the community	People who are isolated/ housebound	N/A	Social	Online	N/A	N/A	N/A	No - Informal, community led	Community food larder	N/A	N/A	N/A	Online	0	Community cohesion during lockdown	No evaluation	Public Domain resource - no evaluation or evaluation unknown	N/A	N/A	N/A	Hand searching	https://www.facebook.com/PUNKCIC/?eid=ARDL9h1XegcEvwxNF2eiXQoZQxraCKc4LHok1O3GSFwFCsPGcEYkNNs9RJWVOPjT3W1wznydP9cqhJRD&fref=mentions&__xts__[0]=68.ARBKgcCsg7Bx2WEiRNQSkYFidG87UPnASgYTGayjI2VYBMsg40jtxAtGwW1w-qpGPA6zrWkfWm3joo25UGEOTUfUC7XE--5sk5N8l7SyeNujaa9jJi3zqIDRV-MH87XbBw_VQxWptcvyEyPJK9i1DKNax_PvdZKX1sTzPX3rXdtW62sfFfjK6J9qpqd8uh36QicRNIbHsU_oFMEToGxnyYP3tDRbDWa0vUYtckYNA3rbn_ahka7RoTzJhtHB…	R96	PHE<10
Mutual aid - Hyperlocal care groups	Public Domain	Resource	Socioeconomic	Community/ Isolated	Everyone in the community	People who are isolated/ housebound	N/A	Social	Online	N/A	N/A	N/A	No - Informal, community led	Mutual aid repository	N/A	N/A	N/A	Online	0	Community cohesion during lockdown	No evaluation	Public Domain resource - no evaluation or evaluation unknown	N/A	N/A	N/A	Hand searching	https://www.opendemocracy.net/en/openmovements/creating-hyperlocal-infrastructure-care-covid-19-mutual-aid-groups/	R97	PHE<10
Covid mutual aid repository	Public Domain	Resource	Socioeconomic	Community/ Isolated	Everyone in the community	People who are isolated/ housebound	N/A	Creative/Art	Online	N/A	N/A	N/A	N/A	National mutual aid repository	N/A	N/A	N/A	Online	0	To provide resource	No evaluation	Public Domain resource - no evaluation or evaluation unknown	N/A	N/A	N/A	Hand searching	https://covidmutualaid.org/local-groups/	R98	PHE<10
Mutual aid - Back garden gigs	Public Domain	Example of activity	Socioeconomic	Community/ Isolated	Everyone in the community	People who are isolated/ housebound	N/A	Music	Online	N/A	N/A	N/A	No - Informal, community led	Back garden gigs	N/A	N/A	N/A	Online	0	Community cohesion during lockdown	No evaluation	Public Domain resource - no evaluation or evaluation unknown	N/A	N/A	N/A	Hand searching	https://www.bbc.co.uk/news/av/uk-england-south-yorkshire-51979042	R99	PHE<10
Mutual aid - Collaborative chalk murals	Public Domain	Example of activity	Socioeconomic	Community/ Isolated	Everyone in the community	People who are isolated/ housebound	N/A	Creative/Art	Online	N/A	N/A	N/A	No - Informal, community led	Collaborative chalk murals	N/A	N/A	N/A	Online	0	Community cohesion during lockdown	No evaluation	Public Domain resource - no evaluation or evaluation unknown	N/A	N/A	N/A	Hand searching	https://www.facebook.com/groups/713292735516917/	R100	PHE<10
National Activity Providers Association (a)	Public Domain	Resource	Socioeconomic	Community/ Isolated	Professionals working with isolated individuals	Professionals working with older people	N/A	Creative/Art	Online	N/A	N/A	N/A	N/A	National activity providers association resource for Covid - Good Practice Resource Guide: Engagement, Activity and Social Distancing	N/A	N/A	N/A	Online	0	How do we isolate people from each other to keep them well, without making them lonely?	No evaluation	Public Domain resource - no evaluation or evaluation unknown	N/A	N/A	N/A	Hand searching	https://napa-activities.co.uk/wp-content/uploads/2020/04/NAPA-Guidance-Social-distancing-April-2020-002.pdf	R101	PHE<10
Rural Arts	Public Domain	Example of activity	Socioeconomic	Community/ Isolated	Everyone in the community	People who are isolated/ housebound	N/A	Creative/Art	Online	N/A	N/A	N/A	N/A	Online art club for people in quarantine	N/A	N/A	N/A	Online	0	Community cohesion during lockdown	No evaluation	Public Domain resource - no evaluation or evaluation unknown	N/A	N/A	N/A	Hand searching	https://www.ruralarts.org/radish	R102	PHE<10
Art Branches	Public Domain	Example of activity	Socioeconomic	Community/ Isolated	Everyone in the community	People who are isolated/ housebound	N/A	Creative/Art	Online	N/A	N/A	30 days	N/A	A 30 day creative challenge suitable for all ages to complete during the Covid 19 self isolation. All can be done in your own home and garden with paper, pencil and things you can find. Please participate and share your ideas and drawings online.	N/A	N/A	N/A	Online	0	Community cohesion during lockdown	No evaluation	Public Domain resource - no evaluation or evaluation unknown	N/A	N/A	N/A	Hand searching	https://www.facebook.com/Art-Branches-Creative-Challenge-109960313983976	R103	PHE<10
National Activity Providers Association (b)	Public Domain	Resource	Socioeconomic	Community/ Isolated	Everyone in the community	People who are isolated/ housebound	N/A	Creative/Art	Online	N/A	N/A	N/A	N/A	NAPA covid resources	N/A	N/A	N/A	Online	0	To provide activity ideas to individuals, caregivers, professionals	No evaluation	Public Domain resource - no evaluation or evaluation unknown	N/A	N/A	N/A	Hand searching	http://napa-activities.co.uk/membership/free-resources	R104	PHE<10
Virtual Social Centre	Public Domain	Example of activity	Socioeconomic	Community/ Isolated	Everyone in the community	People who are isolated/ housebound	N/A	Social	Online	Several every week	Several every week	N/A	N/A	Reading groups, film clubs, resources for parents and caregivers during covid	N/A	N/A	N/A	Online	0	Community cohesion during lockdown	No evaluation	Public Domain resource - no evaluation or evaluation unknown	N/A	N/A	N/A	Hand searching	https://virtualsocialcentre.org.uk/culture-and-learning/	R105	PHE<10
Generation Games	Public Domain	Example of activity	Socioeconomic	Community/ Isolated	Everyone in the community	People who are isolated/ housebound	N/A	Exercise	Online	N/A	N/A	N/A	No - Informal, community led	Exercise for older people - online resource	N/A	N/A	N/A	Online	0	Community cohesion during lockdown	No evaluation	Public Domain resource - no evaluation or evaluation unknown	N/A	N/A	N/A	Hand searching	https://generationgames.org.uk/resource/GG%20home%20exercise%20Info.pdf	R106	PHE<10
March Network	Public Domain	Resource	Socioeconomic	Community/ Isolated	Everyone in the community	People who are isolated/ housebound	N/A	Creative/Art	Online	N/A	N/A	N/A	N/A	March network repository of activities	N/A	N/A	N/A	Online	0	Community cohesion during lockdown	No evaluation	Public Domain resource - no evaluation or evaluation unknown	N/A	N/A	N/A	Hand searching	https://www.marchnetwork.org/creative-isolation	R107	PHE<10
Heritage Fund	Public Domain	Example of activity	Socioeconomic	Community/ Isolated	Everyone in the community	People who are isolated/ housebound	N/A	Creative/Art	Online	N/A	N/A	N/A	N/A	Heritage fund - how to enjoy heritage from home	N/A	N/A	N/A	Online	0	Community cohesion during lockdown	No evaluation	Public Domain resource - no evaluation or evaluation unknown	N/A	N/A	N/A	Hand searching	https://www.heritagefund.org.uk/stories/how-enjoy-heritage-home	R108	PHE<10
Baring Foundation	Public Domain	Example of activity	Socioeconomic	Community/ Isolated	Everyone in the community	People who are isolated/ housebound	N/A	Creative/Art	Online	N/A	N/A	N/A	N/A	Baring foundation covid social prescribing	N/A	N/A	N/A	Online	0	Community cohesion during lockdown	No evaluation	Public Domain resource - no evaluation or evaluation unknown	N/A	N/A	N/A	Hand searching	https://baringfoundation.org.uk/blog-post/being-creative-and-being-together-creative-alternatives-online/	R109	PHE<10
Small Things	Public Domain	Example of activity	Socioeconomic	Several	Women	Older people	Refugee	Creative/Art	Online	N/A	N/A	N/A	N/A	Participatory arts projects	N/A	N/A	N/A	Online	0	Community cohesion during lockdown	No evaluation	Public Domain resource - no evaluation or evaluation unknown	N/A	N/A	N/A	Hand searching	https://smallthings.org.uk/about/	R110	PHE<10
Build Back Better	Public Domain	Resource	Socioeconomic	Community/ Isolated	Everyone in the community	People who are isolated/ housebound	N/A	Creative/Art	Online	N/A	N/A	N/A	N/A	Build back better - societal recovery after covid - online movement	N/A	N/A	N/A	Online	0	Community cohesion during lockdown	No evaluation	Public Domain resource - no evaluation or evaluation unknown	N/A	N/A	N/A	Hand searching	https://www.buildbackbetter.org.uk/about.html	R111	PHE<10
Couch Choir	Public Domain	Example of activity	Socioeconomic	Community/ Isolated	Everyone in the community	People who are isolated/ housebound	N/A	Music	Online	48 hours	One off	2 days March 2020	N/A	Communal singing event; watch videos and learn song; upload and they will turn it into a video	N/A	N/A	N/A	Online	0	Community cohesion during lockdown	No evaluation	Public Domain resource - no evaluation or evaluation unknown	N/A	N/A	N/A	Hand searching	https://www.facebook.com/events/2501350546785658/?active_tab=about	R112	PHE<10
Yes Brixham (2020)	Public Domain	Example of activity	Other	Homeschooling	Parents	N/A	Unknown	Boredom busters bag: help for parents	In person	In your own time	N/A	N/A	No	Informal, ad hoc example of local reach out	N/A	Free for participants	Torquay	South West England	0	To help parents	No evaluation	N/A	N/A	N/A	N/A	Hand searching	https://www.facebook.com/YESBrixham/photos/a.125041475557543/256666965728326/?type=3&theater	R113	PHE<10
Scouts	Public Domain	Example of activity	Other	Homeschooling	Parents	N/A	N/A	Resources for parents	Online	N/A	N/A	N/A	N/A	Indoor activities for kids	N/A	N/A	N/A	Online	0	Community cohesion during lockdown	No evaluation	Public Domain resource - no evaluation or evaluation unknown	N/A	N/A	N/A	Hand searching	https://www.scouts.org.uk/the-great-indoors/	R114	PHE<10
BBC Try It!	Public Domain	Example of activity	Other	Homeschooling	Parents	N/A	N/A	Resources for parents	Online	N/A	N/A	N/A	N/A	Make-along origami jumping frog	N/A	N/A	N/A	Online	0	Community cohesion during lockdown	No evaluation	Public Domain resource - no evaluation or evaluation unknown	N/A	N/A	N/A	Hand searching	https://www.bbc.co.uk/taster/pilots/origamimakealong	R115	PHE<10
Live Music Now	Public Domain	Example of activity	Physical	Elderly, care home	Elderly people, those in care homes	N/A	N/A	Music	Online	N/A	N/A	N/A	N/A	Live music now - videos for care homes and general public	N/A	N/A	N/A	Online	0	Community cohesion during lockdown	No evaluation	Public Domain resource - no evaluation or evaluation unknown	N/A	N/A	N/A	Hand searching	https://www.livemusicnow.org.uk/lmnonlinecare	R116	PHE<10
Edinburgh Art Festival	Public Domain	Example of activity	Socioeconomic	Community/ Isolated	Everyone in the community	People who are isolated/ housebound	N/A	Creative/Art	Online	N/A	N/A	2 months Annually	Yes - artist led	Edinburgh art festival home DIY creative kits	N/A	N/A	N/A	Online	0	Community cohesion during lockdown	No evaluation	Public Domain resource - no evaluation or evaluation unknown	N/A	N/A	N/A	Hand searching	https://www.edinburghartfestival.com/about/learning-and-engagement	R117	PHE<10
Arts and Minds	Public Domain	Example of activity	Socioeconomic	Community/ Isolated	Everyone in the community	People who are isolated/ housebound	N/A	Creative/Art	Online	N/A	Weekly	8 weeks April-May 2020	N/A	Arts and minds - encouraging creativity during covid	N/A	N/A	N/A	Online	0	Community cohesion during lockdown	No evaluation	Public Domain resource - no evaluation or evaluation unknown	N/A	N/A	N/A	Hand searching	https://artsandminds.org.uk/events.html#covid	R118	PHE<10
5x15	Public Domain	Example of activity	Socioeconomic	Community/ Isolated	Everyone in the community	People who are isolated/ housebound	N/A	Creative/Art	Online	N/A	N/A	N/A	N/A	Talks, events online	N/A	£16 per ticket	N/A	Online	0	Community cohesion during lockdown	No evaluation	Public Domain resource - no evaluation or evaluation unknown	N/A	N/A	N/A	Hand searching	https://www.5x15.com	R119	PHE<10
Block Printing with Molly Mahon	Public Domain	Example of activity	Socioeconomic	Community/ Isolated	Everyone in the community	People who are isolated/ housebound	N/A	Creative/Art	Online	N/A	N/A	N/A	Yes - artist led	Block printing at home tutorial	N/A	N/A	N/A	Online	0	Community cohesion during lockdown	No evaluation	Public Domain resource - no evaluation or evaluation unknown	N/A	N/A	N/A	Hand searching	https://www.youtube.com/playlist?list=PLIz7m63Q-AdSyNrQSDLE6zMI4QI05mjDZ	R120	PHE<10
Wowfest	Public Domain	Example of activity	Socioeconomic	BAME	BAME	N/A	N/A	Protest, movement	Online	N/A	N/A	N/A	N/A	Wowfest: BAME BLM protest/ political movements online activities during covid	N/A	N/A	Liverpool	NW England	0	Community cohesion during lockdown	No evaluation	Public Domain resource - no evaluation or evaluation unknown	N/A	N/A	N/A	Hand searching	https://www.wowfest.uk/events.html	R121	PHE<10
The Reader at Home	Public Domain	Example of activity	All	All	Everyone in the community	N/A	N/A	Creative/Art	Online	N/A	N/A	N/A	N/A	Access to reading materials/ shared reading online	N/A	N/A	N/A	Online	0	Community cohesion during lockdown	No evaluation	Public Domain resource - no evaluation or evaluation unknown	N/A	N/A	N/A	Hand searching	https://www.thereader.org.uk/get-involved/the-reader-at-home/	R122	PHE<10
Online cookery classes	Public Domain	Example of activity	All	All	Everyone in the community	N/A	N/A	Cooking	Online	N/A	N/A	N/A	N/A	online cooking classess run by refugee and migrant chefs	N/A	£20 per household	N/A	Online	0	Community cohesion during lockdown	No evaluation	Public Domain resource - no evaluation or evaluation unknown	N/A	N/A	N/A	Hand searching	https://www.migrateful.org/classes/	R123	PHE<10
BBC lockdown orchestra	Public Domain	Example of activity	All	All	Everyone in the community	N/A	N/A	Music	Online	N/A	N/A	N/A	N/A	BBC lockdown orchestra online videos	N/A	N/A	N/A	Online	0	Community cohesion during lockdown	No evaluation	Public Domain resource - no evaluation or evaluation unknown	N/A	N/A	N/A	Hand searching	https://www.bbc.co.uk/programmes/articles/lpcpKcs0Glj7w7hKkJv0Kv/the-bbc-lockdown-orchestra-perform-you-got-the-love	R124	PHE<10
Campaign Against Living Miserably (CALM)	Public Domain	Example of activity	Psychological	Mental Health	People with mental health issues	N/A	N/A	Creative/Art	Online	N/A	N/A	N/A	N/A	CALM comedy club daily comedy online; Starting on 27 April, every day of the week at 3pm (BST), exclusively live streamed through our Twitter feed, we will be having an array of very funny people who’ll be providing 10 mins of laughs, where you can take shelter away from the news and these weird times we’re in.	N/A	N/A	N/A	Online	0	10 mins of laughs, where you can take shelter away from the news and these weird times we’re in.	No evaluation	Public Domain resource - no evaluation or evaluation unknown	N/A	N/A	N/A	Hand searching	https://www.thecalmzone.net/2020/04/the-calm-comedy-club-is-coming-live-to-twitter/	R125	PHE<10
Big Book Weekend	Public Domain	Example of activity	All	Community/ Isolated	Everyone in the community	People who are isolated/ housebound	N/A	Reading	Online	N/A	N/A	19-21 March 2021	N/A	Free virtual festival for anyone who wants to take a break from the grind of lockdown life, watch some brilliant people discussing big ideas, and give themselves an injection of fresh inspiration and energy.	N/A	N/A	N/A	Online	0	N/A	No evaluation	Public Domain resource - no evaluation or evaluation unknown	N/A	N/A	N/A	Hand searching	https://bigbookweekend.com/about-us/	R126	PHE<10
Travel & Leisure	Public Domain	Example of activity	Psychological	Mental Health	People with mental health issues	N/A	N/A	Creative/Art	Online	N/A	N/A	N/A	N/A	Mindfulness activity - virtual train rides from around the world	N/A	N/A	N/A	Online	0	N/A	No evaluation	Public Domain resource - no evaluation or evaluation unknown	N/A	N/A	N/A	Hand searching	https://www.travelandleisure.com/trip-ideas/bus-train/virtual-train-rides?cid=email--NEWSLETTER--EMEA_GB_LON_EN_NEWSLETTER_20200421_FINAL--191586--4/21/2020&subsid=26831--691--6223279	R127	PHE<10
First Site	Public Domain	Example of activity	Socioeconomic	Community/ Isolated	Everyone in the community	People who are isolated/ housebound	Families	Creative/Art	Online	N/A	N/A	N/A	N/A	Art tutorials by artists	N/A	N/A	N/A	Online	0	N/A	No evaluation	Public Domain resource - no evaluation or evaluation unknown	N/A	N/A	N/A	Hand searching	https://firstsite.uk/art-is-where-the-home-is-programme/	R128	PHE<10
Royal Academy	Public Domain	Example of activity	Socioeconomic	Community/ Isolated	Everyone in the community	People who are isolated/ housebound	Families	Creative/Art	Online	N/A	N/A	N/A	N/A	Creative activities - Royal academy family resources	N/A	N/A	N/A	Online	0	N/A	No evaluation	Public Domain resource - no evaluation or evaluation unknown	N/A	N/A	N/A	Hand searching	https://www.royalacademy.org.uk/articles/tag/family-how-to	R129	PHE<10
Consequence of Sound	Public Domain	Example of activity	Socioeconomic	Community/ Isolated	Everyone in the community	People who are isolated/ housebound	N/A	Music	Online	N/A	N/A	N/A	N/A	Quarantine live streams from musicians	N/A	N/A	N/A	Online	0	N/A	No evaluation	Public Domain resource - no evaluation or evaluation unknown	N/A	N/A	N/A	Hand searching	https://consequenceofsound.net/tag/virtual-concert/	R130	PHE<10
The Poetry Society	Public Domain	Example of activity	Other	Homeschooling	Parents	N/A	N/A	Poetry	Online	N/A	N/A	N/A	N/A	Learning from Home: Poetry resources for home schooling	N/A	N/A	N/A	Online	0	N/A	No evaluation	Public Domain resource - no evaluation or evaluation unknown	N/A	N/A	N/A	Hand searching	https://poetrysociety.org.uk/education/learning-from-home/	R131	PHE<10
Misfits Music	Public Domain	Example of activity	Socioeconomic	Community/ Isolated	Everyone in the community	N/A	N/A	Music	Online	N/A	N/A	N/A	N/A	Online jamming for amateur musicians	N/A	N/A	N/A	Online	0	N/A	No evaluation	Public Domain resource - no evaluation or evaluation unknown	N/A	N/A	N/A	Hand searching	https://misfitsmusic.org.uk	R132	PHE<10
Smartify	Public Domain	Example of activity	Socioeconomic	Community/ Isolated	Everyone in the community	N/A	N/A	Creative/Art	Online	N/A	N/A	N/A	N/A	Online access to museum exhibitions	N/A	N/A	N/A	Online	0	N/A	No evaluation	Public Domain resource - no evaluation or evaluation unknown	N/A	N/A	N/A	Hand searching	https://smartify.org	R133	PHE<10
Dancing Alone Together	Public Domain	Example of activity	Socioeconomic	Community/ Isolated	Everyone in the community	N/A	N/A	Music	Online	N/A	N/A	Since March 2020	N/A	Dancing alone together initiative	N/A	N/A	N/A	Online	0	N/A	No evaluation	Public Domain resource - no evaluation or evaluation unknown	N/A	N/A	N/A	Hand searching	https://dancingalonetogether.org	R134	PHE<10
The Wildlife Trusts	Public Domain	Example of activity	Socioeconomic	Community/ Isolated	Everyone in the community	N/A	N/A	Nature	Online	N/A	N/A	N/A	N/A	Wildlife webcams	N/A	N/A	N/A	Online	0	N/A	No evaluation	Public Domain resource - no evaluation or evaluation unknown	N/A	N/A	N/A	Hand searching	https://www.wildlifetrusts.org/webcams	R135	PHE<10
The Turban Project	Public Domain	Example of activity	Socioeconomic	Community/ Isolated	Everyone in the community	N/A	N/A	Creative/Art	Online	N/A	N/A	N/A	N/A	How to make facemasks at home	N/A	N/A	N/A	Online	0	N/A	No evaluation	Public Domain resource - no evaluation or evaluation unknown	N/A	N/A	N/A	Hand searching	https://turbanproject.com/videos	R136	PHE<10
The Holburne Museum	Public Domain	Example of activity	Socioeconomic	Community/ Isolated	Everyone in the community	N/A	N/A	Creative/Art	Online	N/A	N/A	N/A	N/A	Pathways to wellbeing programme - community engagement programme - Holburne Museum	N/A	N/A	N/A	Online	0	N/A	No evaluation	Public Domain resource - no evaluation or evaluation unknown	N/A	N/A	N/A	Hand searching	https://www.holburne.org/learning/community-engagement/pathways-to-wellbeing/	R137	PHE<10
BBC Culture in quarantine	Public Domain	Example of activity	Socioeconomic	Community/ Isolated	Everyone in the community	N/A	N/A	Creative/Art	Online	N/A	N/A	N/A	N/A	BBC- Culture in quarantine - arts and culture videos on the BBC platform	N/A	N/A	N/A	Online	0	N/A	Unclear	Public Domain resource - no evaluation or evaluation unknown	N/A	N/A	N/A	Hand searching	https://www.bbc.co.uk/arts	R138	PHE<10
The Sofa Singers	Public Domain	Example of activity	Socioeconomic	Community/ Isolated	Everyone in the community	N/A	N/A	Music	Online	N/A	N/A	N/A	N/A	Sofa singers virtual choir	N/A	N/A	N/A	Online	0	N/A	No evaluation	Public Domain resource - no evaluation or evaluation unknown	N/A	N/A	N/A	Hand searching	https://www.thesofasingers.net	R139	PHE<10
Singing for Better Breathing	Public Domain	Example of activity	Socioeconomic	Community/ Isolated	Everyone in the community	N/A	N/A	Music	Online	N/A	N/A	N/A	N/A	Singing for better breathing - assisting with lung health during covid	N/A	N/A	N/A	Online	0	N/A	No evaluation	Public Domain resource - no evaluation or evaluation unknown	N/A	N/A	N/A	Hand searching	https://www.marchnetwork.org/creative-isolation?lightbox=dataItem-k7vt4gs3	R140	PHE<10
The Feel Good Book Club	Public Domain	Example of activity	Socioeconomic	Community/ Isolated	Everyone in the community	N/A	N/A	Creative/Art	Online, posted	N/A	Monthly	Since August 2020	N/A	Samaritans - the feel good book club	N/A	£18 per month	N/A	Online	0	N/A	Unclear	Public Domain resource - no evaluation or evaluation unknown	N/A	N/A	N/A	Hand searching	https://www.thefeelgoodbookclub.com/?utm_source=facebook&utm_medium=social&utm_campaign=fgbc	R141	PHE<10
Outdoors for all	Public Domain	Resource	Socioeconomic	Community/ Isolated	Everyone in the community	N/A	N/A	Nature	Online	N/A	N/A	N/A	N/A	The Antional Outdoors for All Working Group - Outdoors for all	N/A	N/A	N/A	Online	0	N/A	No evaluation	Public Domain resource - no evaluation or evaluation unknown	N/A	N/A	N/A	Hand searching	https://outdoorsforallweb.wordpress.com/about/	R142	PHE<10
Natural England	Public Domain	NGO report	All	All	Everyone in the community	N/A	N/A	Nature	Online	N/A	N/A	N/A	N/A	The People and Nature Survey for England: Adult Data Y1Q1 (April - June 2020) (Experimental Statistics)	N/A	N/A	N/A	Online	0	N/A	No evaluation	Public Domain resource - no evaluation or evaluation unknown	N/A	N/A	N/A	Hand searching	https://www.gov.uk/government/statistics/the-people-and-nature-survey-for-england-adult-data-y1q1-april-june-2020-experimental-statistics	R143	PHE<10
Alzheimers society	Public Domain	Example of activity	Physical	Dementia	People with Dementia	N/A	N/A	Creative/Art	Online	N/A	N/A	N/A	N/A	Activity ideas during coronavirus for people with dementia	N/A	N/A	N/A	Online	0	N/A	No evaluation	Public Domain resource - no evaluation or evaluation unknown	N/A	N/A	N/A	Hand searching	https://www.alzheimers.org.uk/get-support/coronavirus/activity-ideas-dementia	R144	PHE<10
ActoDementia	Public Domain	Example of activity	Physical	Dementia	People with Dementia	N/A	N/A	Creative/Art	Online	N/A	N/A	N/A	N/A	ActoDementia: AcTo Dementia provides recommendations and guidance on accessible touchscreen apps for people living with dementia.	N/A	N/A	N/A	Online	0	N/A	Qualitative	Public Domain resource - no evaluation or evaluation unknown	N/A	N/A	N/A	Hand searching	https://www.actodementia.com/	R145	PHE<10
Speed Art Museum	Public Domain	Example of activity	Other	Parents	Parents	N/A	N/A	Creative/Art	Online	N/A	N/A	N/A	N/A	Art Sparks from Home - resources and materials inspired by Art Sparks and the Speed’s collection that are fun for all ages.	N/A	N/A	N/A	Online	0	N/A	No evaluation	Public Domain resource - no evaluation or evaluation unknown	N/A	N/A	N/A	Hand searching	https://www.speedmuseum.org/learn/education-at-home-resources/	R146	PHE<10
Arts 4 Dementia	Public Domain	Social Prescribing Resource	Physical	Dementia	People with Dementia	N/A	N/A	Creative/Art	Online	N/A	N/A	N/A	N/A	A4D Social Prescribing for Dementia Programme: Regional museum-based meeetings to advance social prescribing to arts activities; Southwark weekly Drama and dance Workshops; Chatty Wednesdays; StAn's Virtual Café + signposting to 150 remote access arts events for people with dementia.	N/A	N/A	N/A	Online	0	N/A	No evaluation	Public Domain resource - no evaluation or evaluation unknown	N/A	N/A	N/A	Hand searching	https://arts4dementia.org.uk/events/	R147	PHE<10
Barnsley Museums	Public Domain	Example of activity	All	Creative at home	Everyone in the community	N/A	N/A	Creative/Art	Online	N/A	N/A	N/A	N/A	Barnsley Museums Online Jigsaw Puzzles	N/A	N/A	N/A	Online	0	N/A	No evaluation	Public Domain resource - no evaluation or evaluation unknown	N/A	N/A	N/A	Hand searching	https://www.jigsawplanet.com/BarnsleyMuseums	R148	PHE<10
BBC Reminiscence Archive	Public Domain	Example of activity	Physical	Dementia	People with Dementia	N/A	N/A	Creative/Art	Online	N/A	N/A	N/A	N/A	BBC Reminiscence Archive	N/A	N/A	N/A	Online	0	N/A	No evaluation	Public Domain resource - no evaluation or evaluation unknown	N/A	N/A	N/A	Hand searching	https://remarc.bbcrewind.co.uk/	R149	PHE<10
British Film Institute Archive	Public Domain	Example of activity	All	All	Everyone in the community	N/A	N/A	Creative/Art	Online	N/A	N/A	N/A	N/A	British Film Institute Archive	N/A	N/A	N/A	Online	0	N/A	No evaluation	Public Domain resource - no evaluation or evaluation unknown	N/A	N/A	N/A	Hand searching	https://player.bfi.org.uk/free/collections	R150	PHE<10
BuddyHub	Public Domain	Example of activity	Socioeconomic	Community/ Isolated	People who are isolated or housebound	N/A	N/A	Creative/Art	Online	N/A	N/A	N/A	N/A	BuddyHub: connected communities, happier people	N/A	N/A	N/A	Online	0	N/A	No evaluation	Public Domain resource - no evaluation or evaluation unknown	N/A	N/A	N/A	Hand searching	http://www.buddyhub.co.uk/	R151	PHE<10
Cambridge Curiosity & Imagination	Grey Literature (case study within wider report)	Charity project	Socioeconomic	Deprivation	Families	People with mental health issues	404	Creative/Art	Online, posted	In your own time	Weekly check ins (various)	Since April 2020	Yes - artist led	Creative Care programme : creative packages made by artists for vulnerable families, teens, adults; adults with mental health	Fullscope; Department of Healht and Social Care	Free for participants; Unknown	Cambridge; Peterborough	East England	0	"To encourage people to go out into the world around them, and reconnect with all their senses and with the pleasures of noticing, listening, making and shaping."	Working on validated measurement with a heritage consultant Anna Salaman	Not yet published	Feedback	Feedback: “All except one of the creativity boxes have been delivered and it was a delight to drop them round this morning. The children were absolutely thrilled and their parents really grateful. It really worked I thought, as a way to connect and engage with those families. I was feeling in bit of dip yesterday, with worry and feeling a bit fed up with the situation and what might happen next, …	COMPLETED: 357 packs; 698 downloads; 55 views; 12 packages developed; 13 online classes; community partnerships; social media campaign	https://www.culturehealthandwellbeing.org.uk/sites/default/files/2020-07/Case%20study%20-%20Cambs%20Curiosity%20%26%20Imagination.pdf	CHWA - https://www.culturehealthandwellbeing.org.uk/how-creativity-and-culture-are-supporting-shielding-and-vulnerable-people-home-during-covid-19	R152	PHE > 10
Counterpoints	Public Domain	Charity project	Socioeconomic	Creative at home	Refugees	N/A	N/A	Creative/Art	Online	N/A	N/A	N/A	Yes - artist led	Counterpoints Arts is a leading national organisation in the field of arts, migration and cultural change.	Arts Council; Unbound Philanthropy; Ben and Jerry's; Metropolitan Foundation; Paul Hamlyn; AB Charitable Trust; PRS Foundation; Sam and Bella Sebba Charitable Trust; Comic Relief	N/A	London/ online	Greater London/ online	0	Our mission is to support and produce the arts by and about migrants and refugees, seeking to ensure that their contributions are recognized and welcomed within British arts, history and culture.	No evaluation	Public Domain resource - no evaluation or evaluation unknown	N/A	N/A	N/A	Hand searching	https://counterpointsarts.org.uk/	R153	PHE<10
March Network	Public Domain	Resource	Socioeconomic	Community/ Isolated	People who are isolated or housebound	N/A	N/A	Creative/Art	Online	N/A	N/A	N/A	N/A	March Network - Creative Isolation resources for individuals	UKRI; UCL	N/A	N/A	Online	0	N/A	No evaluation for this particular project?		N/A	N/A	N/A	Hand searching	https://www.marchnetwork.org/creative-isolation	R154	PHE<10
COVID Minds	Public Domain	Resource	Psychological	Mental Health	People researching COVID and related mental health issues	N/A	N/A	Research	Online	N/A	N/A	N/A	N/A	We are a community of researchers running 140 longitudinal studies around the world to understand the impact of the COVID-19 pandemic on mental health.	Wellcome	N/A	N/A	Online	0	N/A	Several - repository of peer reviewed studies		N/A	N/A	N/A	Hand searching	https://www.covidminds.org	R155	PHE<10
Creatabot	Public Domain	Example of activity	Psychological	Wellbeing	All	N/A	N/A	Creative/Art	Online	N/A	N/A	N/A	N/A	Creatabot, which aims to make creativity and culture accessible to all with a focus on health and wellbeing.	N/A	N/A	N/A	Online	0	"To make creativity and culture accessible to all with a focus on health and wellbeing."	No evaluation	Public Domain resource - no evaluation or evaluation unknown	N/A	N/A	N/A	Hand searching	https://creatabot.co.uk/	R156	PHE<10
Everyone Connected	Public Domain	Example of activity	Socioeconomic	Digital poverty	People experiencing Digital poverty	N/A	N/A	Creative/Art	Online	N/A	N/A	N/A	N/A	Everyone Connected (formerly DevicesDotNow) is a project aiming to improve people's quality of life that has been made harder during the Covid-19 pandemic through lack of access to digital technology and skills training.	Good Things Foundation	N/A	N/A	Online	0	"We aim to support the 1.9 million offline households in the UK by supplying devices and connectivity. During the COVID-19 crisis this equipment will enable them to: access accurate health information online, interact with medical support, use essential services, stay socially connected."	Unknown	Public Domain resource - no evaluation or evaluation unknown	N/A	N/A	N/A	Hand searching	https://www.onlinecentresnetwork.org/projects/DevicesDotNow	R157	PHE<10
Ashmolean Museum Oxford	Public Domain	Research Award	Psychological	Mental Health	People with mental health issues	N/A	N/A	Creative/Art	Online	N/A	N/A	N/A	N/A	Evidence for Mental Health Benefits of Online Cultural Experiences	Oxford University Covid-19 Research Response Fund	N/A	N/A	Online	0	"To study the effects of online cultural experiences on mental health."	None yet		N/A	N/A	N/A	Hand searching	https://www.ashmolean.org/article/covid-19-research-award	R158	PHE<10
Voluntary Arts	Public Domain	Example of activity	All	Creative at home	Everyone in the community	N/A	N/A	Creative/Art	Online	N/A	N/A	N/A	N/A	Get Creative is a campaign and festival run by a group of cultural organisations to celebrate and support the everyday creativity happening in homes and public spaces. From outdoor photography to music workshops in your local library, via pottery, yarn bombing and performing on stage, we’re building an actively creative society that caters for everyone of every age, background and ability.	Voluntary Arts	N/A	N/A	Online	0	"Get Creative aims to inspire people to try something new at home or at a Get Creative Festival event and to encourage people to share their own examples of everyday creativity. The annual festival sees community groups, cultural venues and individual creative citizens all host participatory events that are accessible for everyone."	Unknown	Public Domain resource - no evaluation or evaluation unknown	N/A	N/A	N/A	Hand searching	https://www.voluntaryarts.org/get-creative	R159	PHE<10
Google Arts and Culture	Public Domain	Example of activity	All	All	Everyone in the community	N/A	N/A	Creative/Art	Online	N/A	N/A	N/A	N/A	Google Arts and Culture - interactive arts experiences	N/A	N/A	N/A	Online	0	N/A	No evaluation	Public Domain resource - no evaluation or evaluation unknown	N/A	N/A	N/A	Hand searching	https://artsandculture.google.com/; https://artsandculture.google.com/project/streetviews	R160	PHE<10
Arts & Health South West	Public Domain	Research campaign	All	All	All	N/A	N/A	Creative/Art	Online	N/A	N/A	N/A	N/A	Investigating the use of at-home dance resources	N/A	N/A	N/A	Online	0	N/A	None yet		N/A	N/A	N/A	Hand searching	https://www.ahsw.org.uk/latest-news/survey-on-the-use-of-at-home-dance-resources/	R161	PHE<10
Jigsaw Planet	Public Domain	Example of activity	All	Creative at home	Everyone in the community	N/A	N/A	Creative/Art	Online	N/A	N/A	N/A	N/A	Jigsaw Planet - puzzles to do online	N/A	N/A	N/A	Online	0	N/A	No evaluation	Public Domain resource - no evaluation or evaluation unknown	N/A	N/A	N/A	Hand searching	https://www.jigsawplanet.com/	R162	PHE<10
Adult Learning Worcestershire	Public Domain	Example of activity	All	Creative at home	Everyone in the community	N/A	N/A	Poetry	Online	N/A	N/A	N/A	N/A	Lockdown: A compilation of reflections by creatives living in Worcestershire	N/A	N/A	N/A	Online	0	N/A	No evaluation	Public Domain resource - no evaluation or evaluation unknown	N/A	N/A	N/A	Hand searching	https://mcusercontent.com/a694bc0ff11d9dd94b05ccd0d/files/047fe8a0-d40a-482d-b99c-d6dd29d27c49/Lockdown_Reflections_Poems.pdf	R163	PHE<10
London Arts in Health Forum	Public Domain	Resource	Socioeconomic	Community/ Isolated	People who are isolated or housebound	N/A	N/A	Creative/Art	Online	N/A	N/A	N/A	N/A	London Arts in Health Forum: Coronavirus resources	N/A	N/A	London/ online	Greater London	0	N/A	No evaluation	Public Domain resource - no evaluation or evaluation unknown	N/A	N/A	N/A	Hand searching	http://www.lahf.org.uk/resources/coronavirus-resources?mc_cid=388e97b67e&mc_eid=06e445d7fb	R164	PHE<10
Money Saving Central	Public Domain	Example of activity	All	All	Everyone in the community	N/A	N/A	Creative/Art	Online	N/A	N/A	N/A	N/A	Live Animal Cameras	N/A	N/A	N/A	Online	0	N/A	No evaluation	Public Domain resource - no evaluation or evaluation unknown	N/A	N/A	N/A	Hand searching	https://moneysavingcentral.co.uk/live-animal-cameras	R165	PHE<10
Culture Health and Wellbeing Alliance	Grey Literature	NGO Report	Vulnerable	All	Vulnerable all	N/A	N/A	Creative/Art	Online	N/A	N/A	N/A	N/A	How creativity and culture is supporting shielding and vulnerable people at home during Covid-19 – is based on case studies of almost 50 projects in England and Wales, all of whom have created new programmes or adapted existing work to reach people who are shielding or vulnerable in their homes.	CHWA	N/A	N/A	Online	0	The report is intended to bring to light the scope, breadth and reach of the work that cultural and creative organisations and individuals have been doing since lockdown to reach the most vulnerable in our communities, and the immense creativity and care with which this work has been designed.	No evaluation	Public Domain resource - no evaluation or evaluation unknown	N/A	N/A	N/A	Hand searching	https://www.culturehealthandwellbeing.org.uk/how-creativity-and-culture-are-supporting-shielding-and-vulnerable-people-home-during-covid-19	R166	PHE > 10
Marlow Zoo	Public Domain	Example of activity	All	All	Everyone in the community	N/A	N/A	Creative/Art	Online	N/A	N/A	N/A	N/A	What's happening at Marwell Zoo right now? Take a look	N/A	N/A	N/A	Online	0	N/A	No evaluation	Public Domain resource - no evaluation or evaluation unknown	N/A	N/A	N/A	Hand searching	https://www.marwell.org.uk/zoo/keep-in-touch/webcams	R167	PHE<10
Open University	Public Domain	Example of activity	All	Creative at home	Everyone in the community	N/A	N/A	Creative/Art	Online	N/A	N/A	N/A	N/A	Open Learn - free courses from the Open University	N/A	N/A	N/A	Online	0	N/A	No evaluation	Public Domain resource - no evaluation or evaluation unknown	N/A	N/A	N/A	Hand searching	https://www.open.edu/openlearn/	R168	PHE<10
Holburne Museum	Public Domain	Example of activity	Psychological	Mental Health	People experiencing social isolation	Homelessness	N/A	Creative/Art	Online	N/A	N/A	N/A	N/A	Pathways to Wellbeing is a museum-based community engagement programme, led by the Holburne Museum, with art at its heart. It supports people with lived experience of mental health issues, social isolation and homelessness to engage with local heritage and creative art activities, delivering measurable improvements in mental health and wellbeing.	N/A	N/A	N/A	Online	0	N/A	No evaluation	Public Domain resource - no evaluation or evaluation unknown	N/A	N/A	N/A	Hand searching	https://www.holburne.org/learning/community-engagement/pathways-to-wellbeing/	R169	PHE<10
Pinterest	Public Domain	Example of activity	Other	Families	Families	N/A	N/A	Creative/Art	Online	N/A	N/A	N/A	N/A	Pinterest Lockdown to do list	N/A	N/A	N/A	Online	0	N/A	No evaluation	Public Domain resource - no evaluation or evaluation unknown	N/A	N/A	N/A	Hand searching	https://www.pinterest.co.uk/amy_loo/lockdown-to-do-list/ https://www.pinterest.co.uk/6jhamilton/lockdown-ideas/	R170	PHE<10
Ravelry	Public Domain	Example of activity	All	Creative at home	Everyone in the community	N/A	N/A	Creative/Art	Online	N/A	N/A	N/A	N/A	Ravelry free knitting patterns	N/A	N/A	N/A	Online	0	N/A	No evaluation	Public Domain resource - no evaluation or evaluation unknown	N/A	N/A	N/A	Hand searching	https://www.ravelry.com/patterns/sources/free-knitpatterns-website/patterns	R171	PHE<10
Silver Sunday	Public Domain	Resource	Physical	Older	Older adults	N/A	N/A	Several	Online	N/A	N/A	N/A	N/A	Silver Sunday: Online repository of events for older adults	N/A	N/A	N/A	Online	0	N/A	No evaluation	Public Domain resource - no evaluation or evaluation unknown	N/A	N/A	N/A	Hand searching	https://silversunday.org.uk/ecal/list/?utm_source=MyWestminster+Updates&utm_campaign=6c5bee7ab8-EMAIL_CAMPAIGN_2020_03_22_10_27_COPY_01&utm_medium=email&utm_term=0_bd2a0fcc47-6c5bee7ab8-40128987	R172	PHE<10
The Color	Public Domain	Example of activity	All	Creative at home	Everyone in the community	N/A	N/A	Creative/Art	Online	N/A	N/A	N/A	N/A	Online colouring book	N/A	N/A	N/A	Online	0	N/A	No evaluation	Public Domain resource - no evaluation or evaluation unknown	N/A	N/A	N/A	Hand searching	https://www.thecolor.com/	R173	PHE<10
UK Hand Knitting Society	Public Domain	Example of activity	All	Creative at home	Everyone in the community	N/A	N/A	Creative/Art	Online	N/A	N/A	N/A	N/A	UK Hand Knitting Society - knitting for charity free patterns	N/A	N/A	N/A	Online	0	N/A	No evaluation	Public Domain resource - no evaluation or evaluation unknown	N/A	N/A	N/A	Hand searching	https://ukhandknitting.com/knitting-for-charity/charity-knitting-patterns	R174	PHE<10
Manchester Centre for Public History & Heritage	Public Domain	Research Award	All	All	Everyone in the community	N/A	N/A	Nature	Online	N/A	N/A	N/A	N/A	Virtual Heritage and Wellbeing	N/A	N/A	N/A	Online	0	N/A	No evaluation	Public Domain resource - no evaluation or evaluation unknown	N/A	N/A	N/A	Hand searching	https://mcphh.org/2020/06/01/virtual-heritage-and-wellbeing/; https://mcphh.org/2020/07/05/wellbeing-and-heritage-research-in-times-of-closure/	R175	PHE<10
Woodland Trust	Public Domain	Example of activity	All	All	Everyone in the community	N/A	N/A	Nature	Online	N/A	N/A	N/A	N/A	Woodland trust Podcasts	N/A	N/A	N/A	Online	0	N/A	No evaluation	Public Domain resource - no evaluation or evaluation unknown	N/A	N/A	N/A	Hand searching	https://www.woodlandtrust.org.uk/blog/categories/podcasts/	R176	PHE<10
Woodland Walks	Public Domain	Example of activity	All	All	Everyone in the community	N/A	N/A	Nature	Online	N/A	N/A	N/A	N/A	Woodland Walks on YouTube	N/A	N/A	N/A	Online	0	N/A	No evaluation	Public Domain resource - no evaluation or evaluation unknown	N/A	N/A	N/A	Hand searching	https://www.youtube.com/results?search_query=woodland+walks	R177	PHE<10
Barnsley Council	Public Domain	Example of activity	All	All	Everyone in the community	N/A	N/A	Virtual gallery tours, social meetings, forest schools, poetry	Online	N/A	N/A	N/A	N/A	Feels Like Home: Virtual gallery tours, social meetings, forest schools, poetry	N/A	N/A	N/A	Barnsley	0	N/A	Participant retention counted	Public Domain resource - no evaluation or evaluation unknown	N/A	N/A	N/A	Forwarded from LGA	https://www.local.gov.uk/barnsley-museums-staying-safe-and-engaged-barnsley-council	R178	PHE<10
Leeds City council	Public Domain	Example of activity	Socioeconomic	Deprivation - asset poor	People in asset poor areas	N/A	N/A	shopping, theater, social care referral	Online	N/A	N/A	N/A	N/A	No-one in Holbeck and Beeston Goes Hungry: Shopping, theater, social care referral	N/A	N/A	N/A	Leeds	0	N/A	Qualitative	Public Domain resource - no evaluation or evaluation unknown	N/A	N/A	N/A	Forwarded from LGA	https://www.local.gov.uk/slung-low-and-social-care-referrals-no-one-holbeck-and-beeston-goes-hungry	R179	PHE<10
Arts council england/ DfE	Public Domain	Example of activity	Socioeconomic	Parents	Parents of children in asset poor areas or experiencing digital poverty	N/A	N/A	Schools/ children access to cultural assets	Online	N/A	N/A	N/A	N/A	Schools/ children access to cultural assets	N/A	N/A	N/A	England	0	N/A	Participant n counted	Public Domain resource - no evaluation or evaluation unknown	N/A	N/A	N/A	Forwarded from LGA	https://www.local.gov.uk/festival-bridge-lets-create-art-packs-children-and-young-people	R180	PHE<10
Cornwall council	Public Domain	Example of activity	Socioeconomic	Deprivation - asset poor	People in asset poor areas	N/A	N/A	Creative/Art	Online	N/A	N/A	N/A	N/A	FEAST: Arts and cultural activity promotion	N/A	N/A	N/A	Cornwall	0	N/A	Qualitative	Public Domain resource - no evaluation or evaluation unknown	N/A	N/A	N/A	Forwarded from LGA	https://www.local.gov.uk/feast-re-ignition-funding-support-artist-engagement-communities	R181	PHE<10
Wigan Council	Public Domain	Cultural Asset Case Study	Socioeconomic	Deprivation	People using food banks	N/A	600+	Local authority and cultural assets partnership	Online	N/A	N/A	N/A	N/A	The Old Courts Arts Centre: Food parcels and welfare calls; A safety net for the people of Wigan: Wigan arts centre used their distribution netwokr and furloughed workers to become a food distributor to vulnerable families	Wigan LA	Free for participants; Unknown	Wigan	NW England	0	To use existing infrastructure, commnity asset, furloughed workers to link with/ help at risk and vulnerable families	Feedback	Feedback: ‘I feel that the lasting impact of 2020 is we feel even more grateful of The Old Courts and what it’s stands for. It’s an extremely humbling experience to realise that something of such value could be taken away by things out of everyone’s control.’ Jonny Davenport Artistic Director	Sustainability evaluation	"In terms of sustaining this new approach The Old Courts have committed to continuing both services related to the pandemic for as long as they are required in Wigan. As an organisation they specialise in refining lean processes to run all of our projects and they have applied the same treatment to these new strands of work."	600+ families reached	Forwarded from LGA	https://www.local.gov.uk/old-courts-arts-centre-food-parcels-and-welfare-calls-safety-net-people-wigan	R182	PHE<10
University of Sheffield (2020)	Public Domain	Resource	Psychological	Wellbeing	N/A	N/A	N/A	N/A	N/A	N/A	N/A	N/A	N/A	Volunteer value in supporting people in need during COVID-19	N/A	N/A	University of Sheffield	Central England	Longitudinal	Analyse findings from the Mobilising Volunteers Effectively study,	Longitudinal	Local level measures and not national volunteering platforms, have proved vital to responding to community needs during the pandemic. Responses accelratee community engagement and built stronger community relations. Local authorities most succcesffuly if they respect community autonomy. New respect and decisionmaking feeling by volunteers in emergency response role.	N/A	N/A	N/A	Hand searching	University of Sheffield.. 2020. New research shows volunteer value in supporting people in need during COVID-19 - Archive - News archive - The University of Sheffield [WWW Document]. URL https://www.sheffield.ac.uk/news/nr/sheffield-research-shows-value-in-volunteering-1.917122	R183	PHE<10
Tierney & Mahtani (2020)	Public Domain	Resource	Psychological	Wellbeing	N/A	N/A	N/A	N/A	N/A	N/A	N/A	N/A	N/A	Volunteering during the COVID-19 pandemic	N/A	N/A	Oxford	Home county	0	evaluation of 44 articles on how volunteering can help cope during pandemics/emergencies	Evidence Summary	There is weak evidence linking volunteering to positive well-being. In order to benefit, people may need to feel that what they do is likely to make a difference and that it is valued. This idea of ‘mattering’ highlights the fact that although not an explicit reason for volunteering, reciprocity may be important for someone to continue undertaking such work and to gain psychologically from it	N/A	N/A	N/A	Web of Science	Tierney and Mahtani. 2020. Volunteering during the COVID-19 pandemic: What are the potential benefits to people’s well-being? [WWW Document], n.d. . The Centre for Evidence-Based Medicine. URL https://www.cebm.net/covid-19/volunteering-during-the-covid-19-pandemic-what-are-the-potential-benefits-to-peoples-well-being/	R184	PHE<10
Board (2020)	Public Domain	Thought Piece	Physical	Dance	Dance profesionals/teachers	N/A	N/A	Music	N/A	N/A	N/A	N/A	N/A	Moving Embodied Dance Practices Online	N/A	N/A	Online	Online	0	Study the experiences of dance teachers, choregoraphs and practioniers via interview and publications	Qualitative	Dance professionals face challenges in adapting to pandemic; especially in regards to space and connection; sense of 'collective' loss due to no in person contact; but explosion of 'dance' tech. Challenges of teaching and limited proximity and concerns about equity of access .	N/A	N/A	N/A	Hand searching	Board, E., 2020. Moving Embodied Dance Practices Online. The Activist History Review. URL https://activisthistory.com/2020/10/02/moving-embodied-dance-practices-online/	R185	PHE<10
Gianovelli, Boucher & Harrison (2020)	Public Domain	Resource	All	All	Participants: UK Adults	N/A	860	Reading	N/A	N/A	N/A	N/A	N/A	The Lockdown Library Project Summary Report	N/A	N/A	Online	Online	0		Descriptive statistics	Almost 60% participants reading more. Preference for physical books. Almost 75% would discuss contents of books with others, primarily via social media. Novels read the most. Reasons for re-reading old books: escape, enjoyment, happy ending, pleasure, time, comfort, favourite character, old friend, reassurance, sense of stabillity, sense of normality.	N/A	N/A	N/A	Hand searching	Gianovelli, M., Boucher, A., Harrison, C., 2020.The Lockdown Library Project Summary Report. School of Humanities and Social Sciences, Aston University. URL: https://lockdownlibraryproject.wordpress.com/blog-2/	R186	PHE<10
Rauschenberg et al. (2020)	Public Domain	Study - Meta-review (preprint)	Psychological	Wellbeing	N/A	N/A	813 studies	N/A	N/A	N/A	N/A	N/A	N/A	Digital interventions	N/A	N/A	Germany	International (but applicable to UK population)	0	The aim of this rapid meta-review was to investigate the theoretical base, user perspective, safety, effectiveness, and cost effectiveness of digital interventions in public mental health provision (i.e. mental health promotion, prevention of, and treatment for mental disorder).	Meta-analysis	There is good evidence on the usability, safety, acceptance/satisfaction, and effectiveness of eHealth interventions while evidence on mHealth apps is promising, especially if social components (e.g. blended care) and strategies to promote adherence are incorporated. Although most digital interventions focus on the prevention or treatment of mental disorders, there is some evidence on mental heal…	N/A	N/A	N/A	Psyarxiv	Rauschenberg C, Schick A, Hirjak D, Seidler A, Paetzold I, Apfelbacher C, et al. Digital interventions to mitigate the negative impact of the COVID-19 pandemic on public mental health: a rapid meta-review 2020. doi:10.2196/23365.	R187	PHE<10
Jarrat (2020)	Public Domain	Unpublished Study	Psychological	Wellbeing	Participants: UK Adults	N/A	227	Nature	N/A	N/A	N/A	N/A	N/A	An exploration of webcam travel	N/A	N/A	University of Central Lancashire	NW England	0	To examine the surge of popularity in webcam technology to eplore natural environments	Regression	Experience is marked by feelings of freedom, nostalgia and connection which offers POTENTIAL wellness benefits. Use of virtual portals by particiapnts ot connect ot nature, outoodrs and places of happy memories. Brockholes Nature Reservice; increase of 850 views in their nature cams in february to 12.917 views in April (1537% increase). 59% of respondents who explored new places through webcams, …	N/A	N/A	N/A	Sage journals	Jarrat, D. 2020. An exploration of webcam travel: connecting to place and nature through webcams during covid 19 lockdown	R188	PHE<10
Pierce et al (2020)	Peer Reviewed - contextual literature	Study - Secondary Data Analysis	Psychological	Mental Health	Participants: UK Adults	N/A	53 351	N/A	N/A	N/A	N/A	N/A	N/A	Mental health before and during the COVID-19 pandemic: a longitudinal probability sample survey of the UK population	N/A	N/A	University of Manchester	NW England	Preceding trends	To examine changes in adult mental health in the UK population before and during the lockdown.	Longitudinal	Population prevalence of clinically significant levels of mental distress rose from 18·9% (95% CI 17·8–20·0) in 2018–19 to 27·3% (26·3–28·2) in April, 2020, one month into UK lockdown. Mean GHQ-12 score also increased over this time, from 11·5 (95% CI 11·3–11·6) in 2018–19, to 12·6 (12·5–12·8) in April, 2020. This was 0·48 (95% CI 0·07–0·90) points higher than expected when accounting for previou…	N/A	N/A	N/A	Pubmed	Pierce M, Hope H, Ford T, Hatch S, Hotopf M, John A, Kontopantelis E, Webb R, Wessely S, McManus S, Abel KM. Mental health before and during the COVID-19 pandemic: a longitudinal probability sample survey of the UK population. The Lancet Psychiatry. 2020 Oct 1;7(10):883-92.	28	Cochrane - Bronze
Fluharty & Fancourt (2020)	Peer Reviewed - contextual literature	Study - Population Analysis	Psychological	Coping	Participants: UK Adults	N/A	26580	N/A	N/A	N/A	N/A	N/A	N/A	How have people been coping during the COVID-19 pandemic? Patterns and predictors of coping strategies amongst 26,580 UK adults	N/A	N/A	UCL	Greater London	Preceding trends	Understanding how people cope during the covid 19 pandemic	Effect size	Experience of worries about finances, basic needs, and events related to Covid-19 were associated with a range of strategies, while experience of financial adversities was associated with problem-focused, emotion-focused and avoidant coping. There were no associations between coping styles and experiencing challenges in meeting basic needs, but Covid-19 related adversities were associated with a …	N/A	N/A	N/A	PsyARXiv	Fluharty M, Fancourt D. How have people been coping during the COVID-19 pandemic? Patterns and predictors of coping strategies amongst 26,580 UK adults 2020. doi:10.31234/osf.io/nx7y5.	29	Cochrane - Bronze
Bu, Steptoe, Mac & Fancourt (2020)	Peer reviewed - intervention study	Study - Population Analysis	Psychological	Mental Health	Participants: UK Adults	N/A	55204	N/A	N/A	N/A	N/A	N/A	N/A	Time-use and mental health during the COVID-19 pandemic: a panel analysis	N/A	N/A	UCL	Greater London	0	To investigate how specific activities correlate with mental healt and wellbeing	Effect size	Range of activities created; gardening, excersizing lead to improvememnts in mental health, and increased time on news decreased mental health	N/A	N/A	N/A	Google scholar	Bu F, Steptoe A, Mak HW, Fancourt D. Time-use and mental health during the COVID-19 pandemic: a panel analysis of 55,204 adults followed across 11 weeks of lockdown in the UK. medRxiv. 2020 Jan 1.	30	Cochrane - Bronze
Samaroudi, Echavarria & Perry (2020)	Peer Reviewed - contextual literature	Study - Survey	Psychological	Memory	N/A	N/A	83 institutions	N/A	N/A	N/A	N/A	N/A	N/A	Heritage in lockdown: digital provision of memory institutions	N/A	N/A	University of Brighton	South East	0	Understanding how memory institions adapted during COVID 10. Compared US and UK institions as both countries have diversity of institions with digital technology and expertise + lockdown occurred around the same time with similar socioeconomic challenges.	Qualitative	Seeking learning support (teachers, homeschooling parents,) Seeking emotional support and entertainment (arts, crafts, wellbeing benefits; bored or stressed people; lonely people)	N/A	N/A	N/A	Google Scholar	Samaroudi M, Echavarria KR, Perry L. Heritage in lockdown: digital provision of memory institutions in the UK and US of America during the COVID-19 pandemic. Museum Management and Curatorship. 2020 Jul 3;35(4):337-61.	30	Cochrane - Bronze
Fancourt & Baxter (2020)	Peer Reviewed - contextual literature	Study - Population Analysis	Psychological	Mental Health	Participants: UK Adults	N/A	7241	Cultural activities; mental health	N/A	N/A	N/A	N/A	N/A	Differential participation in community cultural activities amongst those with poor mental health:	N/A	N/A	UCL	Greater London	0	To identify whether there are differential participation rates in community cultural activities amongst those with differing levels of mental health (specifically, feelings of anxiety and happiness) and identify potential explanatory factors.	Effect size	There was no difference in participation amongst individuals experiencing high levels of anxious feelings, but individuals experiencing low levels of happiness were less likely to engage in ‘popular’ cultural activities (e.g., live music events/cinema), ‘high art’ cultural activities (e.g., opera/ballet), and crafts and literary cultural events (e.g., exhibitions/book fairs). Education and socio-…	N/A	N/A	N/A	Science direct	Fancourt D, Baxter L. Differential participation in community cultural activities amongst those with poor mental health: Analyses of the UK Taking Part Survey. Social Science & Medicine. 2020 Sep 1;261:113221.	31	Cochrane - Bronze
Von Humboldt et al. (2020)	Peer Reviewed - contextual literature	Study - Survey	Psychological	Meaning of life	Participants: Older adults	N/A	351	N/A	N/A	N/A	N/A	N/A	N/A	Smart technology and the meaning in life of older adults	N/A	N/A	Portugal	International (but applicable to UK population)	0	To analyze older adults perspectives of how smart technology infleunces their meaning in life during COVID	Qualitative - thematic	Themes: meaningful relations, rewarding activites (i.e. taking online classes; visit museums, participant in volunteer groups and webinars) and address boredom/learn new langauges. Distractions via knitting, music, gardening, meditating, tips for lfie and recipes, spritiuality (staying connecting and attending religious ceremonies (health and safety support, self growth, exploring new topics on y…	N/A	N/A	N/A	Taylor and Francis	von Humboldt S, Mendoza-Ruvalcaba NM, Arias-Merino ED, Costa A, Cabras E, Low G, Leal I. Smart technology and the meaning in life of older adults during the Covid-19 public health emergency period: a cross-cultural qualitative study. International Review of Psychiatry. 2020 Sep 14:1-0.	31	Cochrane - Bronze
Vuillier et al (2020)	Peer Reviewed - contextual literature	Study - Survey	Psychological	ED	Participants: Diagnosed with Eating Disorder	N/A	207	N/A	N/A	N/A	N/A	N/A	N/A	The impact of the COVID-19 pandemic on individuals with eating disorders: the role of emotion regulation and exploration of online treatment experiences.	N/A	N/A	University of Bournemouth	SW England	0	Evaluate impact of pandemic on eating disorder behaviour	Effect size/ Qualitative	Most participants (83.1%) reported worsening of ED symptomatology. Qualitative fndings indicated that dicult emotions (such as fear and uncertainty), changes to routine, connement and unhelpful social messages were triggering for participants during the pandemic. While some participants described employing positive coping strategies (such as limiting social media exposure), many reported using ED…	N/A	N/A	N/A	Google scholar	Vuillier L, May L, Greville-Harris M, Surman R, Moseley RL. The impact of the COVID-19 pandemic on individuals with eating disorders: the role of emotion regulation and exploration of online treatment experiences. Journal of eating disorders. 2020 Dec;9(1):1-8.	32	Cochrane - Bronze
Brown et al (2020)	Peer Reviewed - contextual literature	Study - Interview	Psychological	ED	Participants: Diagnosed with Eating Disorder	N/A	10	N/A	N/A	N/A	N/A	N/A	N/A	A qualitative exploration of the impact of COVID-19 on individuals with eating disorders in the UK.	N/A	N/A	University of Liverpool	UK academic study	0	It explores the impact of COVID-19 and associated public health measures on adults with eating disorders within the UK	Qualitative	Core themes identified related to social restrictions (social isolation, changes in accountability to others, and increased responsibility for self and others), functional restrictions (lack of routine and structure, a need to intentionally plan activity, a desire for secrecy particularly around food shopping) and restrictions in access to mental health services. `	N/A	N/A	N/A	PubMed	Brown S, Opitz MC, Peebles AI, Sharpe H, Duffy F, Newman E. A qualitative exploration of the impact of COVID-19 on individuals with eating disorders in the UK. Appetite. 2021 Jan 1;156:104977.	33	Cochrane - Bronze
Schlegl, Maier, Meule, & Voderholzer (2020)	Peer Reviewed - contextual literature	Study - Survey	Psychological	ED	Participants: Diagnosed with anorexia	N/A	150	N/A	N/A	N/A	N/A	N/A	N/A	Eating disorders in times of the COVID-19 pandemic-Results from an online survey of patients with anorexia nervosa.	N/A	N/A	Munich	International (but applicable to UK population)	0	The current study explored effects of the COVID‐19 pandemic on eating disorder (ED) symptoms and other psychological aspects in former inpatients with anorexia nervosa (AN).	Effect size	70% of patients reported that eating, shape and weight concerns, drive for physical activity, loneliness, sadness, and inner restlessness increased during the pandemic. Videoconference therapy was used by 26% and telephone contacts by 35% of patients. Patients experienced daily routines, day planning and enjoyable activities as the most helpful among the most used coping strategies.	N/A	N/A	N/A	PubMed	Schlegl S, Maier J, Meule A, Voderholzer U. Eating disorders in times of the COVID‐19 pandemic—Results from an online survey of patients with anorexia nervosa. International Journal of Eating Disorders. 2020 Nov;53(11):1791-800.	34	Cochrane - Bronze
Weinstein & Nguyen (2020)	Peer Reviewed - contextual literature	Study - Evidence Summary	Psychological	Motivation and preference	Participants living in the UK or the USA aged 35+ years who had reported living alone were recruited via Prolific.co.	N/A	N/A	N/A	N/A	N/A	N/A	N/A	N/A	Motivation and preference in isolation: a test of their different influences on responses to self-isolation during the COVID-19	N/A	N/A	University of Reading	Home county	Longitudinal	This multi-wave study examined the extent that both preference and motivation for time alone shapes ill-being during self-isolation.	Effect size	Arts and creativity: from pop-up public art to TikTok dance trends, from pandemic poetry to a baking craze that drove the price of yeast up by more than 6,000%, people have found joy and meaning in the arts and creativity. UCL’s study of 70,000 adults’ mental health during the pandemic found that 22% engaged more with arts during the lockdown period than usual, and that engaging in creative activ…	N/A	N/A	N/A	Hand searching	Weinstein N, Nguyen TV. Motivation and preference in isolation: a test of their different influences on responses to self-isolation during the COVID-19 outbreak. Royal Society Open Science. 2020 May 13;7(5):200458.	35	Cochrane - Bronze
Brown (2020)	Peer Reviewed - contextual literature	Study - Interview	Psychological	ED	Participants: 10 adults with eating disorders	N/A	10	N/A	N/A	N/A	N/A	N/A	N/A	A qualitative exploration of the impact of COVID-19 on individuals with eating disorders in the UK	N/A	N/A	University of Edinburgh	Scotland	0	explores the impact of COVID-19 and associated public health measures on adults with eating disorders within the UK	Qualitative	Core themes identified related to social restrictions (social isolation, changes in accountability to others, and increased responsibility for self and others), functional restrictions (lack of routine and structure, a need to intentionally plan activity, a desire for secrecy particularly around food shopping) and restrictions in access to mental health services. `	N/A	N/A	N/A	pubMed	Brown S, Opitz MC, Peebles AI, Sharpe H, Duffy F, Newman E. A qualitative exploration of the impact of COVID-19 on individuals with eating disorders in the UK. Appetite. 2021 Jan 1;156:104977.	35	Cochrane - Bronze
Ratschen et al. (2020)	Peer Reviewed - contextual literature	Study - Survey	Psychological	Wellbeing	Participants: UK Adults	N/A	5296	Animals	N/A	N/A	N/A	N/A	N/A	Human-animal relationships and interactions during the Covid-19 lockdown	N/A	N/A	University of York	NE	0	We aimed to investigate links between mental health and loneliness, companion animal ownership, the human-animal bond, and human-animal interactions; and to explore animal owners’ perceptions related to the role of their animals during lockdown.	Descriptive statistics	(89.8%) had at least one companion animal. Most perceived their animals to be a source of considerable support, but concerns were reported related to various practical aspects of providing care during lockdown. Strength of the human-animal bond did not differ significantly between species. Poorer mental health pre-lockdown was associated with a stronger reported human-animal bond). Animal ownersh…	N/A	N/A	N/A	Web of Science	Ratschen E, Shoesmith E, Shahab L, Silva K, Kale D, Toner P, Reeve C, Mills DS. Human-animal relationships and interactions during the Covid-19 lockdown phase in the UK: Investigating links with mental health and loneliness. PloS one. 2020 Sep 25;15(9):e0239397.	36	Cochrane - Bronze
Fancourt, Paul & Bu, F. (2020)	Peer Reviewed - contextual literature	Study - Longitudinal	Psychological	Wellbeing	Participants: Multi-demopgrahic UK population	N/A	N/A	N/A	N/A	N/A	N/A	N/A	N/A	UCL covid social study - explore the psychological and social experiences of adults in the UK during the coronavirus (COVID-19) outbreak.	N/A	N/A	UCL	Greater London	Longitudinal	Exploring the effects of the virus and social distancing measures on adults in the UK during the outbreak of COVID-19.	Longitudinal	Increase remains stable at 4/5 adults doing some form of activity /1 in 5 adults reported not having any face-to-face “in person” contact with others on the last weekday but 3 in 4 adults have been using phoning, video-calling or messaging to stay in touch	N/A	N/A	N/A	Hand searching	Fancourt D, Bu F, Mak HW, Steptoe A. COVID-19 social study. Results release. 2020 Apr 2;15.	39	Cochrane - Bronze
Akulwar-Tajane et al. (2020)	Peer Reviewed - contextual literature	Study - Survey	Psychological	Sleep/wellbeing	Participants: Physiotherapy students	N/A	150	N/A	N/A	N/A	N/A	N/A	N/A	Rethinking Screen Time during COVID-19	N/A	N/A	India	International (but applicable to UK population)	0	To examine how screen use correlates with sleep and wellbeing of physiotherpay students during covid lockdown. To consider how physical exercizes could be a mediating factor to improve sleep pattern and self-perception of wellbeing.	Descriptive statistics	52% report screen use affects sleep quality (reduced duration and mobile phone awakening). 48% say it affects physical wellbeing. 28.7% say it affects mental health. 65.27% say physical exercizes has helped decrease sleeping complaints and mental health issues	N/A	N/A	N/A	Google scholar	Akulwar-Tajane I, Parmar KK, Naik PH, Shah AV. Rethinking Screen Time during COVID-19: Impact on Psychological Well-Being in Physiotherapy Students. Int. J. Clin. Exp. Med. Res. 2020 Sep 24;4:201-16.	40	Cochrane - Bronze
Institute of Fiscal Studies (2020)	Grey Literature	NGO report	Psychological	Depression	N/A	N/A	55204	N/A	N/A	N/A	N/A	N/A	N/A	The mental health effects of the first two months of lockdown and social distancing during the Covid-19 pandemic in the UK.	N/A	N/A	London	UK report	Confidence interval	looked at how individual behaviours either protected or declined mental health during COVID; especially those in relation to activities/time use and mental health and wellbeing	Confidence interval	Time use/activities: 1. Working 2. Volunteering 3. Chores (cooking, cleaning, etc) or carer duties 4. Looking after children 5. Gardening 6. Exersie OUTSIDE (including walks or hit) or inside home/garden 7. Reading 8. Homebaed arts and crafts (music, writing, etc) or digital arts (concert, virtual tours) or DIY 9. Communication with family/friends 10. Following COVID news 11. Listening to radio 1…	N/A	N/A	N/A	MedRxiv	Institute of Fiscal Studies, 2020. The mental health effects of the first two months of lockdown and social distancing during the Covid-19 pandemic in the UK.	41	AACODS > 70%
Mental Health Foundation (2020)	Grey Literature	NGO report	Psychological	Mental Health	Participants: UK Adults	N/A	4251	N/A	N/A	N/A	N/A	N/A	N/A	Coping with the pandemic: a report on how UK adults are dealing with stress	N/A	N/A	London	UK report	0	How uK adults manage stress during pandemic	Descriptive statistics	Six in ten (59 per cent) of UK adults who had experienced stress because of the pandemic said walking helped them cope	N/A	N/A	N/A	Hand searching	Mental Health Foundation, 2020. Coping with the pandemic: New mental health research reveals how UK adults are managing stress. Report.	42	AACODS > 70%
Lades, Laffan, Daly & Delaney (2020)	Peer Reviewed - contextual literature	Study - Survey	All	Emotion	Participants: 604 Adults	N/A	604	N/A	N/A	N/A	N/A	N/A	N/A	Daily emotional well-being during the COVID-19 pandemic	N/A	N/A	N/A	UK academic study	0	to investigate how people experience the activities, interactions, and settings of their lives during the pandemic.	Descriptive statistics	We found that while most time was spent in the home (74%), time spent outdoors (8%) was associated with markedly raised positive affect and reduced negative emotions. Exercising, going for walks, gardening, pursuing hobbies, and taking care of children were the activities associated with the greatest affective benefits. Home‐schooling children and obtaining information about COVID‐19 were ranked …	N/A	N/A	N/A	Google Scholar	Lades LK, Laffan K, Daly M, Delaney L. Daily emotional well‐being during the COVID‐19 pandemic. British journal of health psychology. 2020 Nov;25(4):902-11.	43	Cochrane - Bronze
Office for National Statistics (2020)	Grey Literature	NGO report	Psychological	Depression	N/A	N/A	N/A	N/A	N/A	N/A	N/A	N/A	N/A	Coronavirus and depression in adults.	N/A	N/A	London	UK report	Longitudinal	Review of the psychological impact of quarantine using three electronic databases	Descriptive statistics	Most reviewed studies reported negative psychological effects including post-traumatic stress symptoms, confusion, and anger. Stressors included longer quarantine duration, infection fears, frustration, boredom, inadequate supplies, inadequate information, financial loss, and stigma	N/A	N/A	N/A	ONS	Office for National Statistics, 2020. Coronavirus and depression in adults, Great Britain: June 2020.	44	AACODS > 70%
Wellcome Mental Health (2020)	Grey Literature	NGO report	Psychological	Mental immersion	N/A	N/A	N/A	N/A	N/A	N/A	N/A	N/A	N/A	Covid Living Wrap up report	N/A	N/A	London	Greater London	0	To collect experiences of young adults around the world to see individual approaches of managing mental health and experiment with collection methods	Qualitative	lockdown didn’t only cause anxiety= allowed for people to reflect on normal times. Skills/hobbies allowed for sense of purspoe and control ( especially mentally immersive ones; ie gardening, crochet, drawing in detail, building models, painting patterns etc. Young people conencted with wider people and valued face to face time. However sense of expectation to use time productively created anxiety…	N/A	N/A	N/A	Hand searching	Wellcome Mental Health, 2020. Covid Living Wrap up Report [Internet]. 2020. Available from: https://cms.wellcome.org/sites/default/files/covid-living-wrap-up-report.pdf	45	AACODS > 70%
Wellcome Collection (2020)	Grey Literature	NGO report	Psychological	Resilience	N/A	N/A	N/A	Arts, relationships, religion/ philosophy, nature, games, volunteering, activism, education	N/A	N/A	N/A	N/A	N/A	Collective Resillience: How we've protected our mental health during Covid-19.	N/A	N/A	London	UK report	0	The present study explores older adults’ reports of what about the pandemic is stressful, and what brings joy and comfort in the midst of stress.	Qualitative content analysis	Qualitative analysis revealed 20 stress categories and 21 joy/comfort categories Stressors:mixed method qualitate approach and then content analysis for themes and qunatiative analysis between stressors, joys nad pyschological wellbeing indicators; - Confinement/restrictions - Concern for others - Isolation/loneliness COMFORT: Exercise, faith and nature= associated with more positive psychologica…	N/A	N/A	N/A	Hand searching	Wellcome Collection, 2020. Collective Resillience: How we’ve protected our mental health during Covid-19. Retrieved from https://cms.wellcome.org/sites/default/files/collective-resilience-how-protected-mental-health-during-covid-19.pdf	46	AACODS > 70%
Royal Horticultural Society (2020)	Grey Literature	NGO report	Psychological	Wellbeing	N/A	N/A	N/A	Nature	N/A	N/A	N/A	N/A	N/A	Get the gardening low-down on lock-own	N/A	N/A	Nationwide	UK report	0	Measuring UK Adult relationship and attitude to gardens and outdoor spaces during the lockdown	Qualitative	7 out of 10 of us consider that having a garden has helped our mental health during lockdown with everyday activities such as weeding, mowing and watering cited as having a positive impact. 60% of respondents felt that their physical health has benefited from the opportunity to garden. In total, 59% of people with 10 sq metres or less felt a garden/outdoor space has helped their mental health dur…	N/A	N/A	N/A	Hand searching	RHS. 2020. Get the gardening low-down on lock-own. The Royal Horticultural Societ. URL https://www.rhs.org.uk/advice/health-and-wellbeing/articles/Lockdown-lowdown	47	AACODS < 70%
National Trust (2020)	Grey Literature	Press release	Psychological	Wellbeing	Participants: UK adults	N/A	N/A	Nature	N/A	N/A	N/A	N/A	N/A	UK values nature more as a result of lockdown	N/A	N/A	Nationwide	UK report	0	To study whether UK adults in the pandemic are developing a connection with nature with wellbeing	Descriptive statistics	Findings in the YouGov poll revealed that more than two-thirds (68 per cent) of adults either agreed or strongly agreed that spending time noticing the nature around them has made them feel happy during lockdown. Findings also revealed that since lockdown interest in nature has risen by a third (33 per cent), with interest growing the most in the 25-34 year old age group (40 per cent). And with l…	N/A	N/A	N/A	Hand searching	National Trust, 2020. UK values nature more as a result of lockdown, according to summer solstice poll. URL: https://www.nationaltrust.org.uk/press-release/uk-values-nature-more-as-a-result-of-lockdown-according-to-summer-solstice-poll-	48	AACODS < 70%
RSPB (2020)	Grey Literature	Study - Survey	Psychological	Wellbeing	Participants: UK adults	N/A	2155	Nature	N/A	N/A	N/A	N/A	N/A	A Report Of Public Opinion On The Role And Importance Of Nature	N/A	N/A	Nationwide	UK report	0	The views of adults in England on the role of nature in our communities during the Coronavirus crisis and its potential to help in our recovery	Qualitative	Overwhelming support protecting and investing in nature and increasing accessible natural greenspace as part of our recovery • strongly oppose the UK Government reducing spending • see nature as important for health and wellbeing and access to nature close to home as beneficial during the Coronavirus crisis	N/A	N/A	N/A	Hand searching	RSPB. 2020. Recovering Together: A Report Of Public Opinion On The Role And Importance Of Nature During And In Our Recovery From The Coronavirus Crisis In England. URL: https://www.rspb.org.uk/globalassets/downloads/recovering-together-report/recovering-together-report_nature-and-green-recovery_rspbyougov_june-2020.pdf	49	AACODS < 70%
Thrive (2020)	Grey Literature	Study - Survey	Psychological	Mental Health	Participants: UK Adults	N/A	1000	Gardening	N/A	N/A	N/A	N/A	N/A	Gardening helps mental health	N/A	N/A	Nationwide	UK report	0	Examine gardening in covid	Descriptive statistics	43% of participants agreed its good for mental health and helped them cope in summer/spring. Physical benefits of gardening (47% of over 65 say it keeps them fit). 1/4 men said they spend an additional 3 hours gardening than normal. Growing fruits and veggies= main motivator during lockdown. Accessible gardening= designs and matieral on website of THRIVE. the crisis goes hand in hand with a posit…	N/A	N/A	N/A	Hand searching	Thrive, 2020. Gardening helps mental health during Covid 19. URL: https://www.thrive.org.uk/how-we-help/what-we-do/new-and-updates/gardening-helps-mental-health-during-covid-19	50	AACODS < 70%
56 Degree Insight (2020)	Grey Literature	Study - Survey	Psychological	Wellbeing	Participants: UK Adults	N/A	1487	Nature	N/A	N/A	N/A	N/A	N/A	Engaging with the outdoors during and beyond lockdown	N/A	N/A	Nationwide	UK report	0	Report on benefits of spending time outdoors during lockdown	Qualitative	Activities most likely to be of interest include: Spending time visiting parks, the countryside and the coast (63% would do more than pre-lockdown) Spending time outdoors together with family (51%) Taking walks or runs on off road paths and trails (54%) Playing outdoors with children (49%).	N/A	N/A	N/A	Hand searching	56 Degree Insight, 2020. COVID-19 Impacts: Engaging with the outdoors during and beyond lockdown. URL: https://www.56degreeinsight.com/covid19-engaging-with-the-outdoors	51	AACODS < 70%
The Crafts Council (2020)	Grey Literature	NGO report	All	Craft	N/A	N/A	N/A	Creative/Art	N/A	N/A	N/A	N/A	N/A	The Crafts council: The Market for Craft	N/A	N/A	London	UK report	0	Looking at state of craft market due to the pandemic	Market research data	The findings reveal that there is a growing new generation of younger craft consumers. Savvy buyers, they like collecting and know what they want. They represent a significant shift in patterns of consumption, as craft becomes more mainstream.	N/A	N/A	N/A	Hand searching	The Crafts Council 2020. The Market for Craft: Commissioned by the Crafts Council and Partners. Report: https://www.craftscouncil.org.uk/documents/880/Market_for_craft_full_report_2020.pdf	52	AACODS < 70%
Niedzwiedz et al. (2020)	Peer Reviewed - contextual literature	Study - Longitudinal	Psychological	Behaviour	Participants: UK Adults	N/A	9748	N/A	N/A	N/A	N/A	N/A	N/A	Mental health and health behaviours	N/A	N/A	University of Glasgow	Scotland	0	examined trends in mental health and health behaviours in the UK before and during the initial phase of the COVID-19 lockdown and differences across population subgroups	Effect size	Psychological distress increased one month into lockdown with the prevalence rising from 19.4% (95% CI 18.7%-20.0%) in 2017-19 to 30.3% (95% CI 29.1%-31.6%) in April 2020 (RR=1.3, 95% CI: 1.1,1.4). Groups most adversely affected included women, young adults, people from an Asian background and those who were degree educated. Loneliness remained stable overall (RR=0.9, 95% CI: 0.6,1.5). Smoking de…	N/A	N/A	N/A	MedRxiv	Niedzwiedz C. L., Green, M., Benzeval, M., Campbell, D., Craig, P., Demou,E., et al. (2020). Mental health and health behaviours before and during the initial phase of the COVID-19 lockdown: Longitudinal analyses of the UK Household Longitudinal Study. medRxiv, 2020.06.21.20136820. doi:10.1101/2020.06.21.20136820.	53	Cochrane - Bronze
Fischer et al. (2020)	Peer reviewed - review of intervention	Study - Review	Psychological	Anxiety	Participants: UK Adults	N/A	145744	N/A	N/A	N/A	N/A	N/A	N/A	Rapid review and meta-meta-analysis of self-guided interventions to address anxiety, depression and stress during COVID-19 social distancing.	N/A	N/A	New Zealand	International (but applicable to UK population)	Confidence interval	Meta-analysis of self-guided interventions to address mental health issues during covid	Effect size	3rd wave therapeutic approaches most effect- mindfulness, CBT and acceptance based and activity interventions (music, physical exercise). Many available= online or smart phone app. Self guided interventions= not as effective as group therapy/guided individuals	N/A	N/A	N/A	PsyArXiv	Fischer R, Bortolini T, Karl JA, Zilberberg M, Robinson K, Rabelo A, Gemal L, Wegerhoff D, Nguyễn TB, Irving B, Chrystal M. Rapid review and meta-meta-analysis of self-guided interventions to address anxiety, depression, and stress during COVID-19 social distancing. Frontiers in psychology. 2020;11	54	AMSTAR - Moderate
Karwowski et al. (2020)	Peer Reviewed - contextual literature	Study - Pre/Post	Psychological	Wellbeing	University students	N/A	313	Creative activity	N/A	N/A	N/A	N/A	N/A	Creative Lockdown? A Daily Diary Study of Creative Activity During Pandemics.	N/A	N/A	Poland	International (but applicable to UK population)	0	Study the impact of COVID 19 on creativity	Effect size	ROLE EMOTIONS and CREATIVITY;creativity focuses positive emotions (happy, enthusiastic,) etc. to improve creative performance; Compared to 2019; students engaged more in creative activities and declared more positive emotions Analysis of diaries collected during the pandemic also showed that students who spent more time discussing or searching for information about COVID-19 were not only more eng…	N/A	N/A	N/A	PsyArXiv	Karwowski, Maciej, Aleksandra Zielińska, dorota jankowska, Elżbieta Strutyńska, iwona omelańczuk, and Izabela Lebuda. 2020. “Creative Lockdown? A Daily Diary Study of Creative Activity During Pandemics.” PsyArXiv. doi:10.31234/osf.io/kvesm	55	Cochrane - Bronze
The Conservation Volunteers (2020)	Grey Literature	NGO report	Psychological	Wellbeing	People using social prescribing	N/A	741	Social Prescribing	N/A	N/A	N/A	N/A	N/A	A summary of the issues affecting longer-term VCSE funding including views from before and during the COVID-19 pandemic: Enabling the potential of Social Prescribing	N/A	N/A	London	Greater London	0	highlights some of the ways in which arts organisations have supported the wellbeing of older people during the COVID-19 pandemic, explores the challenges that they are facing, and asks what needs to happen to make sure they can continue to do so.	Descriptive statistics	VCSE funding infrastructure for social prescribing was fragile and piecemeal before the pandemic. Twenty social prescribing schemes (10% of the total) reported being unfunded. Over half of the respondents had seen an increase in referrals (up 62% on average) and self-referrals (up 51% on average) over the past 12 months. Phase 2 data identified ways in which the pandemic has forced social prescri…	N/A	N/A	N/A	Hand searching	The Conservation Volunteers, 2020. Enabling the potential of Social Prescribing - Full report.https://www.tcv.org.uk/wp-content/uploads/2020/09/tcv-social-prescribing-potential.pdf	56	AACODS < 70%
Blake et al. (2020)	Peer reviewed - intervention study	Study - Survey	Psychological	Wellbeing	Hospital employees	N/A	819	N/A	N/A	N/A	N/A	N/A	N/A	Evaluation of the Implementation of Supported Wellbeing Centres	N/A	N/A	University of Nottingham	Central England	0	The aim of the study was to determine facility usage and gather insight into employee wellbeing and the views of employees towards this provision.	Service evaluation	Wellbeing was higher in those that accessed a wellbeing centre. Work engagement and job satisfaction were high. Healthcare organisations are urged to mobilise access to high-quality rest spaces and Psychological First Aid, but this should be localised and diversified.	N/A	N/A	N/A	Pubmed	Blake H, Yildirim M, Wood B, Knowles S, Mancini H, Coyne E, Cooper J. COVID-Well: Evaluation of the implementation of Supported Wellbeing Centres for hospital employees during the COVID-19 pandemic. International journal of environmental research and public health. 2020 Jan;17(24):9401.	57	Cochrane - Bronze
Y Lab (2020).	Grey Literature	NGO report	All	Barriers to participation	Participants: arts and health professionals from across Wales	N/A	12	N/A	N/A	N/A	N/A	N/A	N/A	HARP COVID-19 Sprint Challenge Final Report: How could the arts support people living through lockdown? How could access to arts interventions be improved? Our sprint challenge aimed to build our knowledge to support more people in Wales.	N/A	N/A	London	UK report	0	The HARP Covid-19 Sprint was a time-limited, experimental innovation project, based in Wales. The aim was to inspire and support arts and	Qualitative	All four teams managed to successfully test their ideas, which included: daily sketching and writing activities inspired by virtual reality experiences; small online groups creating story chains using a variety of art forms; families creating art (musicdancing and drawing) together online. Especially important were building trust and connections both in health and community environments, investin…	N/A	N/A	N/A	Hand searching	Y Lab, 2020. HARP COVID-19 Sprint Challenge. Y-Lab. Report: https://ylab.wales/harp-covid-19-sprint-challenge-final-report	58	AACODS < 70%
Wolf, Reinhardt & Funk (2020)	Peer Reviewed - contextual literature	Study - Conference proceedings	All	Virtual exhibitions	N/A	N/A	N/A	Museum Exhibitions	N/A	N/A	N/A	N/A	N/A	Virtual exhibitions: what do we win and what do we lose?	N/A	N/A	Germany	International (but applicable to UK population)	0	Virtual user study to compare experiences of physical and virtual museum in Otto Weidt Musem in Germany	Descriptive statistics	12/18 visitors preffered physical enviroinment; but enjoyed the language and zoom ability of VR and web accesibility; favourited the spatial sensory experirence of texture/oetc of physical	N/A	N/A	N/A	Google Scholar	Wolf K, Reinhardt J, Funk M. Virtual exhibitions: what do we win and what do we lose?. Electronic Visualisation and the Arts. 2018 Jul:79-86.	59	Cochrane - None
Hacker, Vom Brocke, Handali, Otto & Schneider (2020)	Peer Reviewed - contextual literature	Study - Secondary Data Analysis	Other	Web conferencing	Twitter users	N/A	N/A	N/A	N/A	N/A	N/A	N/A	N/A	Virtually in this together – how web-conferencing systems enabled a new virtual togetherness	N/A	N/A	Leichtenstein	International (but applicable to UK population)	0	To examine the role of web conferencing technology and the internet during the Covid-19 Pandemic	Qualitative - thematic	Key activities involving web conferencing involved community meet ups, staying connecting with family and friends, social interactions and online group gatherings. Online game nights (bingo cards integrated, dice caups (everyday objects) lockdown quizzes), happy hours, birthday parties, feamily reunions, 'watch parties'. Online CULTURAl events (concerns), church services, online book clubs, onlin…	N/A	N/A	N/A	Taylor and Francis	Hacker, J., Vom Brocke, J., Handali, J, Otto, M., & Schneider, K. (2020) Virtually in this together – how web-conferencing systems enabled a new virtual togetherness during the COVID-19 crisis, European Journal of Information Systems, 29:5, 563-584, DOI: 10.1080/0960085X.2020.1814680	60	Cochrane - Bronze
Faulkner et al. (2020)	Peer Reviewed - contextual literature	Study - Survey	Physical	Physical Activity	Participants: UK Adults	N/A	8425	Exercise	N/A	N/A	N/A	N/A	N/A	Physical activity, mental health and well-being of adults	N/A	N/A	University of Limerick	Ireland	0	To test whether National Govvernment COVID strategies have impacted on physical activity, mental health and wellbeing in UK, Ireland, NZ and Australia	Descriptive statistics	Negative change in exercise bheaivour between pre/early covid 19 restrictions had POORER mental health and wellbeing compared to those with positive/no change. No differences between countries (although NZ reported general better mental health and wellbeing).	N/A	N/A	N/A	medrxiv	Faulkner J, O’Brien WJ, McGrane B, Wadsworth D, Batten J, Askew CD, Badenhorst C, Byrd E, Coulter M, Draper N, Elliot C. Physical activity, mental health and well-being of adults during initial COVID-19 containment strategies: A multi-country cross-sectional analysis. Journal of science and medicine in sport. 2021 Apr 1;24(4):320-6.	61	Cochrane - Bronze
Jacob et al. (2020)	Peer Reviewed - contextual literature	Study - Survey	Physical	Wellbeing	Participants: 902 adults	N/A	902	Exercise	N/A	N/A	N/A	N/A	N/A	The relationship between physical activity and mentalhealth	N/A	N/A	Spain	International (but applicable to UK population)	0	Investigate the cross-sectional association between physical activity levels with depressive symptoms, anxiety symptoms, and positive mental well-being in a sample of the UK public social distancing owing to COVID-19.	Regression	In the present sample of UK adults social distancing owing to COVID-19 those who were physically active have better overall mental health. Negative association between moderate-to-vigorous physical activity per day in hours and poor mental health	N/A	N/A	N/A	NCB	Jacob L, Tully MA, Barnett Y, Lopez-Sanchez GF, Butler L, Schuch F, López-Bueno R, McDermott D, Firth J, Grabovac I, Yakkundi A. The relationship between physical activity and mental health in a sample of the UK public: A cross-sectional study during the implementation of COVID-19 social distancing measures. Mental health and physical activity. 2020 Oct 1;19:100345.	62	Cochrane - Bronze
Nigro et al. (2020)	Peer Reviewed - contextual literature	Study - Evidence Summary	Physical	Physical Activity	N/A	N/A	N/A	Exercise	N/A	N/A	N/A	N/A	N/A	Molecular mechanisms involved in the positive effects of physical activity	N/A	N/A	Italy	International (but applicable to UK population)	0	review of molecular mechanisms modulated by PA to provide equipment against viral infections like covid	Regression	In the present sample of UK adults social distancing owing to COVID-19 those who were physically active have better overall mental health. Negative association between moderate-to-vigorous physical activity per day in hours and poor mental health	N/A	N/A	N/A	Pubmed	Nigro E, Polito R, Alfieri A, Mancini A, Imperlini E, Elce A, Krustrup P, Orrù S, Buono P, Daniele A. Molecular mechanisms involved in the positive effects of physical activity on coping with COVID-19. European journal of applied physiology. 2020 Sep 3:1-4.	63	Cochrane - Bronze
McCall, Heneghan & Nunan (2020)	Grey Literature	Evidence Summary	Physical	Exercise	Patients with Acute Respiratory Infection (ACI)	Healthy adults	N/A	Evidence Summary	Various	Various	Various	Various	Yes Clinician led	Does physical exercise prevent or treat acute respiratory infection (ARI)?	Oxford Covid-19 Evidence Service Team	N/A	Oxford	UK wide academic study written in Oxford	Several control groups across the included studies	To assess the need for exercise interventions for respiratory health for Covid-19	Narrative review, authors' own evaluation	Exercise decreases rate and duration of ACI and it is in the public interest to promote exercise	N/A	N/A	N/A	Hand searching	McCall, M., Heneghan, C., Nunn, D. 2020. Does physical exercise prevent or treat acute respiratory infection (ARI)?. Report. Centre for Evidence Based Medicine. Oxford. https://www.cebm.net/covid-19/does-physical-exercise-prevent-or-treat-acute-respiratory-infection-ari/	64	AACODS > 70%
Robinson et al. (2021)	Peer Reviewed - contextual literature	Study - Survey	Physical	Physical Activity	Participants: UK Adults	N/A	2002	N/A	N/A	N/A	N/A	N/A	N/A	Obesity, eating behavior and physical activity during COVID-19 lockdown: A study of UK adults	N/A	N/A	UCL	Greater London	0	examined weight related behaviours and weight management barriers in UK Adults during lockdonw using online surveys measuring physical activity, diet quality, etc.	Descriptive statistics	Results: precieved barriers and issues to weight management; - Negative changes in eating and physical activity and problems with motivation/control around food - TRENDS focused on participants with HIGHER BMI= more likely to reduce physical activity and diet equality - Decline in mental health= predictor of greater overeating and lower physical activity F8	N/A	N/A	N/A	pubMed	Robinson, E., Boyland, E., Chisholm, A., Harrold, J., Maloney, N. G., Marty, L., Mead, B. R., Noonan, R., & Hardman, C. A. 2021. Obesity, eating behavior and physical activity during COVID-19 lockdown: A study of UK adults. Appetite, 156, 104853. https://doi.org/10.1016/j.appet.2020.104853	65	Cochrane - Bronze
What Works Centre for Wellbeing, (2020)	Grey Literature	NGO report	Psychological	Wellbeing	Virtual local choir participants	N/A	N/A	Music	N/A	N/A	N/A	N/A	N/A	Virtual Choirs and Wellbeing	N/A	N/A	N/A	UK report	0	To measure the wellbeing impact of choir members when rehearsal moved online using the Centre’s Guide for Measuring your Wellbeing Impact.	Focus group discussions. Reflective and event based.	Depite not singing together in person, online rehearsals still delivered a positive experience for many singers. Good example of how indvidual organizations can evaluate changes in wellbeing of ongoing projects. Many found the online sessions continued to inspire as a result of the music chosen and the work of the choir leader. Weekly rehearsals provided a focus for learning and purpose. There we…	N/A	N/A	N/A	Hand searching	What works centre for wellbeing, 2020. Virtual Choirs and Wellbeing. What Works Well. URL https://whatworkswellbeing.org/blog/virtual-choirs-and-wellbeing-podcast/	66	AACODS > 70%
Buckley & Westaway. (2020)	Peer Reviewed - contextual literature	Study - Ethnography	Psychological	Happiness and gratitude	Participants: 100000 adults	N/A	100000	Nature	N/A	N/A	N/A	N/A	N/A	Mental health rescue effects of women’s outdoor tourism: A role in COVID-19 recovery. Annals of Tourism Research	N/A	N/A	Australia	International (but applicable to UK population)	0	we examine how outdoor tourism and recreation may be able to generate mentally therapeutic outcomes, for urban women with families in a developed nation.	Qualitative - ethnography	Resulting themes: happiness and gratitude ('improved my state of mind, physical and emotional health), Relaxation release and clarity (it allowed me to unwind and find peace), Capability transformation and missing life (creaiton of new challenges), pyshcological rescue (it got me through some of my darest times) Comanionship and community (powerful and nurtutring), Family attitudes and chidren (r…	N/A	N/A	N/A	Sciencedirect	Buckley R, Westaway D. Mental health rescue effects of women's outdoor tourism: A role in COVID-19 recovery. Annals of tourism research. 2020 Nov 1;85:103041.	67	Cochrane - Bronze
Johannes, Vuorre & Przybylski (2020)	Peer Reviewed - contextual literature	Study - Survey	Psychological	Wellbeing	Participants: Players of Plants vs Zombies, Battle for Neighborville and Animal Crossing: New Horizons	N/A	6529	Gaming	N/A	N/A	N/A	N/A	N/A	Video game play is positively correlated with well-being	N/A	N/A	University of Oxford	Home county	0	To investigate the relations between video gamesand subjective well-being of players in collaboration with two industry partners,Electronic Arts and Nintendo of America.	Descriptive statistics	Video game play is positively associated with wellbeing unline previously thought. Whereas previous research had to rely on self-reported play behaviour, the authors collaborated with two games companies, Electronic Arts and Nintendo of America, to obtain players’ actual play behaviour. They surveyed players of Plants vs. Zombies: Battle for Neighborville and Animal Crossing: New Horizons for the…	N/A	N/A	N/A	Psyarxiv	Johannes N, Vuorre M, Przybylski AK. Video game play is positively correlated with well-being. Royal Society open science. 2020 Feb 17;8(2):202049.	68	Cochrane - Bronze
Baracsi (2020)	Grey Literature	Unpublished Study	Psychological	Kindness	N/A	N/A	N/A	N/A	N/A	N/A	N/A	N/A	N/A	Coronavirus Kindness Phenomenon	N/A	N/A	Unclear	Preliminary research	0	This study is concerned with this phenomenon and the representation of socially engaged visual arts & crafts during the first 27 days of lockdown in the UK	Descriptive statistics	Physiological needs (144 events, 21% of 692) were mostly food donations (79 events, 55% of 144) and fundraisings (45 events, 31% of 144).	N/A	N/A	N/A	Hand searching	Baracsi, Z. 2020. Coronavirus Kindnes Phenomenon: Trends of Social Flow of Creativity during the First 27 Days of Social Distancing in the COVID-19 Pandemic in the UK. pHD Preliminary Research. URL http://www.wiseninggate.uk/documents/covid.pdf	69	AACODS > 70%
Kriz (2020)	Peer Reviewed - contextual literature	Study - Review	Psychological	Mental Health	All	N/A	N/A	Gaming	N/A	N/A	N/A	N/A	N/A	Gaming in the Time of COVID-19	N/A	N/A	N/A	International (but applicable to UK population)	0	To investigate the relations between video gamesand subjective well-being of players in collaboration with two industry partners,Electronic Arts and Nintendo of America.	Regression	Contrary to many fears that excessive game time will lead to addiction and poor mental health, we found a small positive relation between game play and well-being. Need satisfaction and motivations during play did not interact with game time but were instead independently related to well-being. Our results advance the field in two important ways	N/A	N/A	N/A	Google scholar	Kriz, W. C. 2020.'Gaming in the Time of COVID-19’, Simulation & Gaming, 51(4), pp. 403–410. doi: 10.1177/1046878120931602.	70	AMSTAR - critically low
Townsend (2020)	Peer Reviewed - contextual literature	Study - Review	Psychological	Wellbeing	N/A	N/A	N/A	Gardening	N/A	N/A	N/A	N/A	N/A	The professional wild food community	N/A	N/A	James Hutton Institute, Aberdeen	Scotland	0	Examine how wild food foraging adapted to the pandemic	Descriptive statistics	The majority of wild food professionals are engaged in teaching – typically in the form of courses in which clients join a group and explore rural (and sometimes urban) natural habitats, learning how to identify edible wild plants and fungi, as well as learning which plants and fungi to avoid. wild food professionals; eithe rplaced credit, refunded but some decided to create online classes due to…	N/A	N/A	N/A	taylor and francis	Townsend L. The professional wild food community and Covid-19: The use of online platforms in supporting people to access alternative food sources. Local Development & Society. 2020 Aug 24:1-6.	71	Cochrane - Bronze
Rousseau & Deschacht (2020)	Peer Reviewed - contextual literature	Study - Secondary Data Analysis	Psychological	Wellbeing	N/A	N/A	N/A	Nature	N/A	N/A	N/A	N/A	N/A	Public Awareness of Nature and the Environment	N/A	N/A	Belgium	International (but applicable to UK population)	0	Investigating how public awareness of nature/environment evolved during Covid-19	Descriptive statistics	Covid-19 pandemic has caused the 'anthropause'; deterioration of mental health and concerns. This study demonstrates how localizeed outdoor tourism can improve mental health of clients. EMOTIONAL, RESTORAXTIVE AND WORLDVIEW PSYCHOLOGICAL OUTCOMES and therapeutic effects of 'pyschological rescue' of commercial nature tourism. With a focu son URBAN WOMENS MENTAL HEALTH>high nature related topics (m…	N/A	N/A	N/A	google scholar	Rousseau S, Deschacht N. Public awareness of nature and the environment during the COVID-19 crisis. Environmental and Resource Economics. 2020 Aug;76(4):1149-59.	72	Cochrane - Bronze
Zabini et.al. (2020)	Peer reviewed - intervention study	Study - Survey	Psychological	Anxiety	People with mental health issues	N/A	90	Nature	N/A	N/A	N/A	N/A	N/A	Comparative Study of the Restorative Effects of Forest and Urban Videos	N/A	N/A	Italy	International (but applicable to UK population)	0	this study investigated the effectiveness of a simple and affordable remedy for improving psychological well-being, based on audio-visual stimuli brought by a short computer video showing forest environments, with an urban video as a control.	Effect size	The virtual exposure to forest environments showed effective to reduce perceived anxiety levels in people forced by lockdown in limited spaces and environmental deprivation. Although significant, the effects were observed only in the short term, highlighting the limitation of the virtual experiences.	N/A	N/A	N/A	Google scholar	Zabini F, Albanese L, Becheri FR, Gavazzi G, Giganti F, Giovanelli F, Gronchi G, Guazzini A, Laurino M, Li Q, Marzi T. Comparative study of the restorative effects of forest and urban videos during COVID-19 lockdown: Intrinsic and benchmark values. International Journal of Environmental Research and Public Health. 2020 Jan;17(21):8011.	73	Cochrane - Bronze
Giordano et al. (2020)	Peer reviewed - intervention study	Study - Intervention	Psychological	Wellbeing	Participants: Clinical Staff	N/A	34	N/A	In person	N/A	3 times a week	4 weeks	Yes -RCT	Receptive music therapy to reduce stress and improve wellbeing	N/A	N/A	Italy	International (but applicable to UK population)	Control group	9 weeks study exploring role of music therapy to reduce stress and improve wellbeing in clinical staff working with Covid-19 patients	Effect size	Results indicicate variation in emotional status; confirm that remote MT supports CS in high stress situations ; improvement in energy, breathing, serenity.	N/A	N/A	N/A	Pubmed	Giordano F, Scarlata E, Baroni M, Gentile E, Puntillo F, Brienza N, Gesualdo L. Receptive music therapy to reduce stress and improve wellbeing in Italian clinical staff involved in COVID-19 pandemic: A preliminary study. The Arts in psychotherapy. 2020 Sep 1;70:101688.	74	Cochrane - Bronze
Viana & de Lira (2020)	Peer reviewed - review of intervention	Study - Review	Psychological	Anxiety	People with Anxiety Disorder	N/A	N/A	Exercise	N/A	N/A	N/A	N/A	N/A	Exergames as Coping Strategies for Anxiety Disorders	N/A	N/A	Brazil	International (but applicable to UK population)	Confidence interval	Critical apprasail of exergames as coping strategy to treat anxiety in COVID lockdown	Confidence interval	Exergames: ‘active video games’ = appear to be most enjoyable example of home based excersize: - Increase motivation and self efficacy - Previous studies= improve physical activity, performance, heart rate, oxygen consumption, energy expenditure, etc. - Single session reduces anxiety (22) Single session of Zumba Fitness= reduces anxiety in health youn women (22) Participants in dance-based exerga…	N/A	N/A	N/A	Hand searching	Viana RB, de Lira CA. Exergames as coping strategies for anxiety disorders during the COVID-19 quarantine period. Games for health journal. 2020 Jun 1;9(3):147-9.	75	AMSTAR - critically low
Gilbert (2020)	Grey Literature	Unpublished Study	Psychological	Wellbeing	Participants: UK Adults	N/A	99	Sewing	N/A	N/A	N/A	N/A	N/A	Voluntary sewing group effiacy	N/A	N/A	University of Worcester	Midlands	0	The study considers the responses of individual research participants within a Tamworth community group forming as a direct result of Covid-19. It examines the emotions and motivations of community voluntary	Qualitative	Emotions linked to: purpose, community; Volunteering is useful way of improving wellbeing and social connection during the pandemic by creating purpose. Locally oriented projects are well received.	N/A	N/A	N/A	Hand searching	Gilbert, B. 2020.Examining the motivations and emotions linked to the formation of a Voluntary sewing group formed in response to Covid-19 'Tamworth Volunteers – Sewing for NHS and Healthcare Workers. University of Worcester. URL http://eprints.worc.ac.uk/9895/2/Gilbert-2020-presentation-Examining-the-motivations-and-emotions-linked-to-the-formation-of-a-Voluntary-sewing-group-formed-in-response-…	76	AACODS > 70%
Choi, Tessler & Kao (2020)	Peer reviewed - intervention study	Study - Mixed methods	Psychological	Coping	Parents and Teachers in the US and Korea	N/A	N/A	N/A	N/A	N/A	N/A	N/A	N/A	Arts and crafts as an educational strategy and coping mechanism	N/A	N/A	USA	International (but applicable to UK population)	0	The authors of this article explored how some parents have shifted towards cultural and creative enrichment as a resource to occupy their children during governmental stay-at-home directives in both the United States and the Republic of Korea.	Market and sales research	The authors found that arts and crafts and educational toy sales have increased, parents are sharing advice and resources for at-home creative activities, and arts and cultural institutions have expanded their free online content. This article discusses whether the short-term stressors from COVID-19 might lead to long-term changes in parenting and sustained interest in these resources.	N/A	N/A	N/A	PubMed	Choi M, Tessler H, Kao G. Arts and crafts as an educational strategy and coping mechanism for Republic of Korea and United States parents during the COVID-19 pandemic. International Review of Education. 2020 Oct 23:1-21.	77	Cochrane - Bronze
University of Cumbria (2020)	Grey Literature	Study - Survey	Psychological	Wellbeing	Participants: UK Adults	N/A	703	Nature	N/A	N/A	N/A	N/A	N/A	Connection with Nature in the UK during the COVID-19 Lockdown.	N/A	N/A	University of Cumbria	NE	0	To explore experiences of nature during COVID 19 lockdown	Descriptive statistics	There has been a large increase in desire to spend time in nature among adults in the UK. 72% of women and 60% of men reported that they are more likely to spend time in nature in future, following lockdown.	N/A	N/A	N/A	Hand searching	University of Cumbria, 2020. Connection with Nature in the UK during the COVID-19 Lockdown.	78	AACODS > 70%
Ugolini.,et.al. (2020)	Peer Reviewed - contextual literature	Study - Survey	Physical	Urban green space	Participants: people living in urban areas	N/A	2560	Green space	N/A	N/A	N/A	N/A	N/A	Effects of the COVID-19 pandemic on the use and perceptions of urban green space:	N/A	N/A	Italy	International (but applicable to UK population)	0	This study aims to identify the drivers that normally attract visitors to Urban Green Space, and to assess the effects of social isolation on the usage and perception of UGS during the COVID-19 pandemic.	Effect size	Results showed that urban residents normally have a need for accessible UGS, mainly for physical exercise, relaxing and observing nature. The reduction in UGS visitation during the containment period was related to distinct changes in the motivations of those who did visit, with a relative increase in "necessary activities" such as taking the dog out, and a reduction in activities that could be c…	N/A	N/A	N/A	PubMed	Ugolini F, Massetti L, Calaza-Martínez P, Cariñanos P, Dobbs C, Ostoić SK, Marin AM, Pearlmutter D, Saaroni H, Šaulienė I, Simoneti M. Effects of the COVID-19 pandemic on the use and perceptions of urban green space: An international exploratory study. Urban forestry & urban greening. 2020 Dec 1;56:126888.	79	Cochrane - Bronze
Rogers et al. (2020)	Peer Reviewed - contextual literature	Study - Survey	Physical	Physical Activity	Participants: UK Adults	N/A	N/A	N/A	N/A	N/A	N/A	N/A	N/A	Behavioural change towards reduced intensity physical activity is disproportionately prevalent among adults with serious health issues or self-perception of high risk during the UK COVID-19 lockdown	N/A	N/A	N/A	UK academic study	0	To assess whether lockdown had disproportionate impact on physical activity in covid 19	Descriptive statistics	Study implies those with diability, depression, obesity, hypertension and lung disease most likely to reduce intensity of PA during lockdown (relevant as its therapetuci management of disease); hence advice more poerteinent to promote home-based excersizes INCLUDIGN DAILY STEP COUNT and more intense forms of PA RESULTS:	N/A	N/A	N/A	medrxiv	Rogers NT, Waterlow NR, Brindle H, Enria L, Eggo RM, Lees S. Behavioral change towards reduced intensity physical activity is disproportionately prevalent among adults with serious health issues or self-perception of high risk during the UK COVID-19 lockdown. Frontiers in public health. 2020;8.	80	Cochrane - Bronze
Rowley et al. (2020)	Peer Reviewed - contextual literature	Study - Service Evaluation	Physical	Exercise	N/A	N/A	N/A	Exercise	N/A	N/A	N/A	N/A	N/A	Adapt or Perish: Exercise referral schemes’ operational changes during the Covid-19 pandemic.	N/A	N/A	N/A	UK academic study	0	Service evaluation in May 2020of UK-based exercise referral schemes for individuals medically referred to an exercise prescription to improve, manage and treat a long-term health condition and increase physical activity levels.	Descriptive statistics	Social Prescribing can be succesfully adapated. 54% still offering SOME level of service: § Exercize videos § Online virtual classes § Leaflets § Telephone support § Support via updated websites § Deliver exercize equipment to patients to use at home (in one scheme) 46% Not offering ANY service/halted operations (due to lack of software capacity to deliver online sessions, furloughed staff) Shift…	N/A	N/A	N/A	Google Scholar	Rowley N, Shore C, Buckley B, Hesketh K. Adapt or Perish: Exercise referral schemes’ operational changes during the Covid-19 pandemic. SportRxiv. October. 2020 Oct;2.	81	Cochrane - Bronze
McCarthy, Potts & Fischer (2020)	Peer Reviewed - contextual literature	Study - Longitudinal	Physical	Physical Activity	Participants: App Users	N/A	5395	Exercise	N/A	N/A	N/A	N/A	N/A	Physical Activity Behaviour Before, During and After COVID-19 Restrictions	N/A	N/A	UCL	Greater London	0	explore patterns of tracked activitiy of uk residents	Effect size	We found significant changes in PA from the week before the first case of COVID-19 was announced (baseline), to the week that social distancing restrictions were relaxed (Friedman test: ?2(2) = 2331, p < 0.001.) By the first full week of lockdown, the median change in PA 57 minutes less than baseline. This represents a 37% reduction in weekly minutes of PA. Overall, 63% of people decreased their …	N/A	N/A	N/A	Web of Science	McCarthy H, Potts HW, Fisher A. Physical Activity Behavior Before, During, and After COVID-19 Restrictions: Longitudinal Smartphone-Tracking Study of Adults in the United Kingdom. Journal of Medical Internet Research. 2021;23(2):e23701.	82	Cochrane - Bronze
Sport England (2020)	Grey Literature	Study - Survey	Physical	Exercise	Participants: 2000 adults	N/A	2000	N/A	N/A	N/A	N/A	N/A	N/A	Exploring the attitudes and behaviours in England	N/A	N/A	University of Liverpool	NW England	0	Report explores the amount and type of activity being undertaken, how activity is changing over time, who people are being active with, and what they are thinking and feeling about being active during the pandemic.	Mixed methods analysis	31% did more, 41% did less PA; - 62% adults think its important - 69% agree exercise important to maintain physical health: 65% agree for mental health - Governments messages about physical movement have been positive (53% have been encouraged by government) o 59% walked, 44% online fitness, 18% jogging, 8% cycled Types of activities: (from most to least) APRIL § Walking 59% § Any home based acti…	N/A	N/A	N/A	Hand searching	Sport England, 2020. COVID-19 Briefing: Exploring the attitudes and behaviours in England during the COVID 19 Pandemic. URL:https://www.sportengland.org/know-your-audience/demographic-knowledge/coronavirus?section=research	83	AACODS < 70%
Sharma et al. (2020)	Peer reviewed - intervention study	Study - Pilot	Physical	Chronic pain	Patients with chronic pain	N/A	18	Exercise	N/A	N/A	N/A	N/A	N/A	Tele- Yoga therapy for Patients with Chronic Pain	N/A	N/A	N/A	UK academic study	Control group	To evaluate impact of TELE YOGA therpay on patients with chronic pain, disability, anxiety and depression	Effect size	Improvements to all factors; including pain intensity, anxiety and depression reduction	N/A	N/A	N/A	medrxiv	Sharma N, Modi D, Nathwani A, Pandya B, Joshi J. Tele-Yoga therapy for Patients with Chronic Pain during Covid-19 Lockdown: A Prospective Nonrandomized Single Arm Clinical Trial. medRxiv. 2020 Jan 1.	84	Cochrane - Bronze
Heyang & Martin (2020)	Peer Reviewed - contextual literature	Study - Review	Physical	Dance	Dance teachers	N/A	N/A	Music	N/A	N/A	N/A	N/A	N/A	A reimagined world: international tertiary dance education	N/A	N/A	China	N/A	0	Reflection on series of virtual theatre events held by colelctive encounters; to consider effects of pandemic on participants, makers ant the practice	Qualitative	Themes= innovation, motivation, cultural agenda, slow scholarship, online pedagogy, virtual and corporeal mobility; engagement crucial for dance institions to kepe relationships and dialogue	N/A	N/A	N/A	Taylor anad Francis	Heyang T, Martin R. A reimagined world: international tertiary dance education in light of COVID-19. Research in Dance Education. 2020 Jun 14:1-5.	85	Cochrane - Bronze
Philip, Lewis & Jeffery (2020)	Peer reviewed - intervention study	Study - RCT	Physical	Singing for lung health	Participants: UK adults	N/A	120	Music	In person	1.5 hours	Once a week	12 weeks	Yes -RCT	Moving singing for lung health	N/A	N/A	Imperial College	Greater London	Control group	This study identifies key considerations regarding the adaptation of SLH from face-to-face to online delivery.	Effect size	Attendance was 69% overall, (90% of the face-to-face sessions, 53% online sessions). Analysis of semistructured interviews identified three themes regarding participation in SLH delivered face to face and online, these where (1) perceived benefits; (2) digital barriers (online) and (3) digital facilitators (online). Findings were summarised into key considerations for optimising transitioning sin…	N/A	N/A	N/A	PubMed	Philip KE, Lewis A, Jeffery E, Buttery S, Cave P, Cristiano D, Lound A, Taylor K, Man WD, Fancourt D, Polkey MI. Moving singing for lung health online in response to COVID-19: experience from a randomised controlled trial. BMJ open respiratory research. 2020 Nov 1;7(1):e000737.	86	Cochrane - Silver
Mürbe et al. (2020)	Peer reviewed - intervention study	Study - Experimental	Physical	Singing	Participants: Singers	N/A	8	Music	N/A	N/A	N/A	N/A	N/A	Aerosol emission is increased in professional singing	N/A	N/A	Germany	International (but applicable to UK population)	Control group	Impact of singing on spreading Covid-19	Effect size	In the investigated cohort of eight volunteers, the loud vocalizations and physical exertion increases risk of aerols in air, especially in indoor setting with poor ventilation and crowds= hence in person singing a huge risk	N/A	N/A	N/A	Google Scholar	Mürbe, D., Kriegel, M., Lange, J., Rotheudt, H., Fleischer, M., 2020. Aerosol emission is increased in professional singing (preprint). Open Science Framework. https://doi.org/10.31219/osf.io/znjeh	87	Cochrane - Bronze
Giebel et al. (2020)	Peer Reviewed - contextual literature	Study - Survey	Physical	Dementia	People with Dementia	Carers of peopl ewith dementia	569	N/A	N/A	N/A	N/A	N/A	N/A	A UK survey of COVID-19 related social support closures and their effects on older people, people with dementia, and carers.	N/A	N/A	University of Edinburgh	Scotland	0	explore the impact of COVID‐19 public health measures on access to social support services and the effects of closures of services on the mental well‐being of older people and those affected by dementia.	T-test, Chi square	Inability to access social support due to covid= increased anxiety and worse QOL	N/A	N/A	N/A	Google scholar	Giebel C, Pulford D, Cooper C, Lord K, Shenton J, Cannon J, Shaw L, Tetlow H, Limbert S, Callaghan S, Whittington R. COVID-19-related social support service closures and mental well-being in older adults and those affected by dementia: a UK longitudinal survey. BMJ open. 2021 Jan 1;11(1):e045889.	88	Cochrane - Bronze
Lee, O'Neill & Moss (2020)	Peer reviewed - intervention study	Study - Phenomenological	Physical	Dementia	People with Dementia	N/A	N/A	Music	N/A	N/A	N/A	N/A	N/A	Promoting well-being among people with early-stage dementia and their family carers through community-based group singing: a phenomenological study	N/A	N/A	N/A	UK academic study	0	To measure how community based singing supports individuals with dementia during the pandemic.	IPA and Semi-Structured Interviews	Weekly rehearsals provided a focus for learning and purpose. There were practical advantages to online rehearsals – not having to travel and comfort of being at home. Rehearsals remained a shared experience. Initially the majority of singers described their reasons for being a member of the choir relating to a love of music and singing, however, the value of relationships and friendships formed w…	N/A	N/A	N/A	PubMed	Lee S, O’Neill D, Moss H. Promoting well-being among people with early-stage dementia and their family carers through community-based group singing: a phenomenological study. Arts & Health. 2020 Oct 31:1-7.	89	Cochrane - Bronze
Roberts (2020)	Peer Reviewed - contextual literature	Study - Review	Socioeconomic	Community asset use	Everyone in the community	N/A	N/A	No intervention - description of leisure use under lockdown	N/A	N/A	N/A	N/A	N/A	Lockdown Leisure in Britain: Narrative review of leisure activities uptake during UK lockdown	N/A	N/A	Liverpool	UK wide academic study written in Liverpool	0	To give an overview of how leisure time has been used during lockdown in order to inform leisure/ marketing studies	Narrative review - authors own evaluation	Age and sex differences in how individuals spent lockdown; childcare and housework increased for men whilst DIY and leisure time for men. Over 60s spent less time in childcare and more time in leisure activities. Sleeping, resting, leisure increased. Implications for wellbeing, social cohesion, economy	Unknown	N/A	N/A	Taylor and francis	Roberts K. Locked down leisure in Britain. Leisure Studies. 2020 Sep 2;39(5):617-28.	90	Cochrane - Bronze
Mak, Fluharty, Fancourt (2020)	Peer Reviewed - contextual literature	Study - Cross Sectional	All	Arts engagement	Participants: UK Adults	N/A	19384	Surveys	N/A	N/A	N/A	N/A	N/A	Predictors and impact of arts engagement during the COVID-19 pandemic: analyses of data from 19,384 adults in the COVID-19 Social Study	Nuffield Foundation	N/A	UK wide	UK wide academic study written in London	Statistical model controlled for demographic and psychometric data	This study aims to address: (i) who was likely to engage with the arts at home during lockdown, (ii) how this engagement differed from patterns of arts engagement prior to COVID-19, and (iii) whether home-based arts engagement was related to people’s ability to cope with their emotions during lockdown.	Regression models	Demographics, socio-economic factors, psychosocial/ health, adverse events/ worries, coping styles were associated with the type/ frequency/ exposure of activities.	N/A	N/A	N/A	SocArXiv	Mak HW, Fancourt D. Predictors of engaging in voluntary work during the Covid-19 pandemic: analyses of data from 31,890 adults in the UK.	91	Cochrane - Bronze
Mak, Fluharty & Fancourt (2020)	Peer Reviewed - contextual literature	Study - Survey	All	Arts engagement	Participants: UK Adults	N/A	19384	Creative/Art	N/A	N/A	N/A	N/A	N/A	Predictors and impact of arts engagement during the COVID-19 pandemic	N/A	N/A	UCL	Greater London	0	This study aims to address: (i) who was likely to engage with the arts at home during lockdown, (ii) how this engagement differed from patterns of arts engagement prior to COVID-19, and (iii) whether home-based arts engagement was related to people’s ability to cope with their emotions during lockdown.	Regression	The home-based arts engagement were identified during the COVID-19 pandemic: digital arts & writing, performing arts, crafts, and reading for pleasure. The results show that the strongest predictors of the engagement were age, education levels, social support, social network size, and trait emotion-focused or supportive coping styles. In particular, younger adults (aged 18-29), non-keyworkers, pe…	N/A	N/A	N/A	PsyArXiv	Mak HW, Fluharty M, Fancourt D. Predictors and impact of arts engagement during the COVID-19 pandemic: analyses of data from 19,384 adults in the COVID-19 Social Study. Frontiers in Psychology. 2021;12.	91	Cochrane - Bronze
Collective Encounters (2020)	Grey Literature	Study - Focus Group	Socioeconomic	Deprivation - many	Participants: 320 participatory theatre makers, creative learning managers, engagement managers, choreographers, drama teachers, lecturers, HE course leads, artistic directors, producers, choir leaders and researchers.	N/A	320	Theatre	N/A	N/A	N/A	N/A	N/A	Delivering Participatory Theatre during the Pandemic: what's working?	N/A	N/A	Liverpool	NW England	0	Throughout June 2020 Collective Encounters ran a series of free events exploring how the participatory theatre sector was responding to COVID-19 and the effect lockdown and social distancing was having on participants, participatory theatre makers and their practice.	Qualitative	THEMES FOUND: 1. digital inclusion, 2. from zoom to room, 3. digital participatory theatre, 4. safeguarding online, 5. online workshop activities	N/A	N/A	N/A	Hand searching	Collective Encounters, 2020.Delivering Participatory Theatre during the Pandemic: What's working?. Collective Encounters. URL https://collective-encounters.org.uk/wp-content/uploads/2020/07/Delivering-Participatory-Theatre-During-Social-Distancing-Whats-Working-Low-Res.pdf	92	AACODS < 70%
Randler et al. (2020)	Peer Reviewed - contextual literature	Study - Comparison	Psychological	Wellbeing	Participants: UK Adults	N/A	4484	Nature	N/A	N/A	N/A	N/A	N/A	Lockdown Influences Nature-Based Recreational Activity	N/A	N/A	Germany	International (but applicable to UK population)	Cross culture comparison	this study focused on the behavioral changes of birders due to the Covid-19 Pandemic	Descriptive statistics	People focused mostly on yard birding. In total, 12% of respondents (n = 542 cases) reported having more time for birding, whereas 8% (n = 356 cases) reported having less time for birding. Social interactions decreased since respondents, especially older people, changed their birding behavior toward birding alone or with their spouse. Women reported more often than men that they changed to birdin…	N/A	N/A	N/A	Web of Science	Randler C, Tryjanowski P, Jokimäki J, Kaisanlahti-Jokimäki ML, Staller N. SARS-CoV2 (COVID-19) Pandemic Lockdown Influences Nature-Based Recreational Activity: The Case of Birders. International journal of environmental research and public health. 2020 Jan;17(19):7310.	94	Cochrane - Bronze
